# Supplementary material for: Metal and acid-free synthesis of acenaphthenone-2-ylidene ketones in PEG 400 and their radical nitration by TBN in water
Source: Royal Society of Chemistry journal article supplement (doi:10.1039/d4ob00963k), 2024-01-01
Supplement: d4ob00963k1.pdf [file d4ob00963k1.pdf]

## Supporting Information

### **Metal and acid-free synthesis of acenaphthenone-2-ylidene ketones in PEG 400 and their radical nitration by TBN in water.**

Tiyasa Dhar,<sup>a</sup> Debasish Bera,<sup>a</sup> Tandrima Chaudhuri<sup>b</sup> and Chhanda Mukhopadhyay<sup>\*a</sup>

<sup>a</sup>Department of Chemistry, University of Calcutta, 92 APC Road, Kolkata-700009, India  
<sup>\*</sup>E-mail: [cmukhop@yahoo.co.in](mailto:cmukhop@yahoo.co.in)

<sup>b</sup>Department of Chemistry, Dr. Bhupendranath Dutta Smriti Mahavidyalaya, Burdwan 713407, India.

# Table of contents

|                                                                                 |       |
|---------------------------------------------------------------------------------|-------|
| 1. General information of material and instruments.....                         | 3     |
| 2. Procedure for synthesis of compound <b>3a, 3b, 5a</b> and <b>5b</b> .....    | 3-18  |
| 3. $^1\text{H}$ NMR and $^{13}\text{C}$ NMR of compound <b>3aa-3as</b> .....    | 19-37 |
| 4. $^1\text{H}$ NMR and $^{13}\text{C}$ NMR of compound <b>3ba-3bd</b> .....    | 38-41 |
| 5. $^1\text{H}$ NMR and $^{13}\text{C}$ NMR of compound <b>5aa-5as</b> .....    | 42-60 |
| 6. $^1\text{H}$ NMR and $^{13}\text{C}$ NMR of compound <b>5ba-5bd</b> .....    | 61-64 |
| 7. Mass spectrum of the crude reaction mixture.....                             | 65    |
| 8. Experiment to prove the geometry of the synthesized.....<br>compound (Z)-5ab | 66-68 |
| 9. HSQC of compound <b>3ai</b> and <b>5ai</b> .....                             | 69-70 |
| 10. <b>Table 1</b> : Optimization of reaction condition.....                    | 71    |
| 11. Green metrics calculation.....                                              | 72-74 |

## General information of materials and instruments :

All commercially available chemicals were purchased from Aldrich, USA or Spectrochem, India, and used without further purification. All solvents were used as received. The progress of the reaction was checked by glass sheets pre-coated TLC with silica gel (with binder, 300 mesh, Spectrochem) and column chromatography was performed using silica gel (100-200 mesh). Bruker 300 MHz and 400 MHz instruments were used for  $^1\text{H}$  and  $^{13}\text{C}$  NMR spectra at 300 MHz, 400 MHz and 75 MHz, 100 MHz respectively. Chemical shifts are reported in parts per million (ppm) downfield from an internal TMS (tetramethylsilane) reference. Coupling constants ( $J$ ) are reported in hertz (Hz), and spin multiplicities are represented by the symbols s (singlet), brs (broad singlet), d (doublet), t (triplet), q (quartet) and m (multiplet). HRMS with an ESI resource were acquired using a Waters XEVO-G2S Q TOF mass spectrometer. 2400 Series II CHNS Analyzer, Perkin Elmer USA was used for elemental analyses. For all four compounds, the ground state geometries were optimized using the hybrid density functional B3LYP method, i.e., Becke's three parameter nonlocal-exchange functional [1] with the nonlocal correlation functional of Lee, Yang and Parr [2], with high angular momentum basis set 6-31G (d, p) [3]. Optimization is followed by frequency calculation using the same basis set to obtain the appropriate stationary point for each compound. All the calculations have been performed starting from a Molecular Mechanics [4] optimized geometry of the compounds using Gaussian'09.

### Procedure for synthesis of compound (E)-3aa :

Acenaphthylene 1,2 dione **1** (1 mmol) , Acetophenone **2aa** (1 mmol) were added with 1 ml of PEG 400 in a dry 10 ml round bottom flask with a magnetic stirrer bar . Then the reaction mixture was allowed to run at 110 °C for 2.5 hour . After reaching the completion, which was further monitored by TLC the reaction mixture was cooled to room temperature and diluted with 10 ml of ice cooled water and extracted with EtOAc ( 3 × 5 ml ) . The organic layer was combined and washed with brine and dried over anhydrous  $\text{Na}_2\text{SO}_4$  .After the solvent was removed under reduced pressure, the crude product was purified by column chromatography using 100-200 mesh silica gel and petroleum ether-ethyl acetate mixture as the eluent to afford the desired product (E)-**3aa**.

**Procedure for synthesis of compound (E)-3ba :**

Acenaphthylene 1,2 dione **1** (1 mmol) ,Methyl 2-(triphenylphosphoranylidene)acetate **2ba** (1 mmol) were added with 1 ml of PEG 400 in a dry 10 ml round bottom flask with a magnetic stirrer bar . Then the reaction mixture was allowed to run at 110 °C for 2.5 hour . After reaching the completion, which was further monitored by TLC the reaction mixture was cooled to room temperature and diluted with 10 ml of ice cooled water and extracted with EtOAc ( 3 × 5 ml ). The organic layer was combined and washed with brine and dried over anhydrous Na<sub>2</sub>SO<sub>4</sub> .After the solvent was removed under reduced pressure, the crude product was purified by column chromatography using 100-200 mesh silica gel and petroleum ether-ethyl acetate mixture as the eluent to afford the desired product **(E)-3ba** .

**Procedure for synthesis of compound (Z)-5aa :**

(E)-2-(2-oxo-2-phenylethylidene)acenaphthylene-1(2H)-one (**3aa**) (1mmol) , **4** (1.2 mmol) were added with 1 ml of H<sub>2</sub>O in a dry 10 ml round bottom flask with a magnetic stirrer bar . Then the reaction mixture was allowed to run at 80 °C for 2 hour . After reaching the completion, which was further monitored by TLC the reaction mixture was cooled to room temperature and diluted with 10 ml of ice cooled water and extracted with EtOAc ( 3 × 5 ml ). The organic layer was combined and washed with brine and dried over anhydrous Na<sub>2</sub>SO<sub>4</sub> .After the solvent was removed under reduced pressure, the crude product was purified by column chromatography using 100-200 mesh silica gel and petroleum ether-ethyl acetate mixture as the eluent to afford the desired product **(Z)-5aa**.

**Gram scale synthesis of (Z)- 5aa :**

(E)-2-(2-oxo-2-phenylethylidene)acenaphthylene-1(2H)-one (**3aa**) (1.57 gm, 6 mmol, 1.0 equiv ) , **4** (7.2 mmol, 1.2 equiv ) were added with 5 ml of H<sub>2</sub>O in a dry 10 ml round bottom flask with a magnetic stirrer bar . Then the reaction mixture was allowed to run at 80 °C for 2 hour . After reaching the completion, which was further monitored by TLC the reaction mixture was cooled to room temperature and diluted with 20 ml of ice cooled water and extracted with EtOAc ( 3 × 10 ml ). The organic layer was combined and washed with brine and dried over anhydrous Na<sub>2</sub>SO<sub>4</sub> .After the solvent was removed under reduced pressure, the crude product was purified by column chromatography using 100-200 mesh silica gel and petroleum ether-ethyl acetate mixture as the eluent to afford the desired product **(Z)-5aa**.

**Procedure for synthesis of compound (Z)- 5ba :**

Methyl (E)-2-(2-oxoacenaphthylen-1(2H)-ylidene)acetate (**3ba**) (1 mmol) , **4** (1.2 mmol ) were added with 1 ml of H<sub>2</sub>O in a dry 10 ml round bottom flask with a magnetic stirrer bar . Then the reaction mixture was allowed to run at 80 °C for 2 hour. After reaching the completion, which was further monitored by TLC the reaction mixture was cooled to room temperature and diluted with 10 ml of ice cooled water and extracted with EtOAc (3 × 5 ml). The organic layer was combined and washed with brine and dried over anhydrous Na<sub>2</sub>SO<sub>4</sub> .After the solvent was removed under reduced pressure, the crude product was purified by column chromatography using 100-200 mesh silica gel and petroleum ether-ethyl acetate mixture as the eluent to afford the desired product (**Z**)-**5ba** .

**Gram scale synthesis of (Z)-5ba :**

Methyl (E)-2-(2-oxoacenaphthylen-1(2H)-ylidene)acetate (**3ba**) (1.35gm , 6 mmol, 1.0 equiv ) , **4** (7.2 mmol, 1.2 equiv) were added with 5 ml of H<sub>2</sub>O in a dry 10 mL round bottom flask with a magnetic stirrer bar . Then the reaction mixture was allowed to run at 80 °C for 2 hour . After reaching the completion, which was further monitored by TLC the reaction mixture was cooled to room temperature and diluted with 20 ml of ice cooled water and extracted with EtOAc ( 3 × 10 ml ). The organic layer was combined and washed with brine and dried over anhydrous Na<sub>2</sub>SO<sub>4</sub> .After the solvent was removed under reduced pressure, the crude product was purified by column chromatography using 100-200 mesh silica gel and petroleum ether-ethyl acetate mixture as the eluent to afford the desired product (**Z**)-**5ba**.

*(E)-2-(2-oxo-2-phenylethylidene)acenaphthylen-1(2H)-one* (Table 2, entry 1, **3aa**)

Yellow solid, Yield: 90% ; R<sub>f</sub> : 0.2 ( 8% Ethyl Acetate in Petroleum Ether ) ; M.P. = 126-128 °C ; <sup>1</sup>H NMR (300 MHz, CDCl<sub>3</sub>): δ (ppm) = 8.73 (d, J = 9 Hz , 1H), 8.18 ( t, 3H) ,8.11 (d, J = 6 Hz, 2H), 8.02 (d, J = 6 Hz, 1H), 8.01 (d, J = 8 Hz, 1H), 7.99 (s, 1H) , 7.81- 7.70 (m, 2H) , 7.66 (d, J = 9 Hz , 1H) , 7.58 (t ,2H) ; <sup>13</sup>C NMR ( 75 MHz, CDCl<sub>3</sub> ), δ(ppm) = 190.6 , 186.4 ,143.5 , 135.2 , 134.6 , 132.6 , 130.8 , 130.4 , 130.0 , 129.9 , 129.6 , 129.2 , 129.1 , 129.0 , 128.5 , 127.0 , 125.9 , 123.1 ; HRMS (ESI/TOF-Q) M/Z : [M+H]<sup>+</sup> Calcd. for [C<sub>20</sub>H<sub>12</sub>O<sub>2</sub>] : 284.0837 ; Found : 284.0830 .

*(E)*-2-(2-oxo-2-(*p*-tolyl)ethylidene)acenaphthylen-1(2*H*)-one (Table 2, entry 2, **3ab**)

Yellow solid, Yield: 93% ; Rf : 0.2 (10% Ethyl Acetate in Petroleum Ether ) ; M.P. = 132-134 °C ; <sup>1</sup>H NMR (300 MHz, CDCl<sub>3</sub>): δ (ppm) = 8.68 (d, J = 9 Hz, 1H), 8.13 (d, J = 6 Hz, 1H), 8.09 (d, J = 9 Hz, 3H) , 7.99 (d, J = 9 Hz, 1H) , 7.96 (s, 1H) , 7.78- 7.67 (m, 2H), 7.36 (d, J = 9 Hz, 2H) , 2.47 (s, 3H) ; <sup>13</sup>C NMR ( 75 MHz, CDCl<sub>3</sub> ), δ(ppm) = 192.8 , 191.4 , 144.8 , 142.8 , 142.0 , 135.5 , 131.8 , 131.4 , 130.8 , 130.6 , 129.6 , 129.0 , 128.8 , 128.0 , 127.8 , 125.2 , 124.2 , 121.9 , 21.8 ; HRMS (ESI/TOF-Q) M/Z : [M+H]<sup>+</sup> Calcd. for [C<sub>21</sub>H<sub>14</sub>O<sub>2</sub>] : 298.0994 ; Found : 298.0992 .

*(E)*-2-(2-(4-methoxyphenyl)-2-oxoethylidene)acenaphthylen-1(2*H*)-one (Table 2, entry 3, **3ac**)

Yellow solid, Yield: 92% ; Rf : 0.25 (8% Ethyl Acetate in Petroleum Ether ) ; M.P. = 130-132 °C ; <sup>1</sup>H NMR (400 MHz, CDCl<sub>3</sub>): δ (ppm) = 8.64 (d, J = 8 Hz , 1H), 8.19 (d, J= 8 Hz, 2H) ,8.16 (d, J = 8 Hz, 1H), 8.11 (d, J = 8 Hz, 1H), 8.01 (d, J = 8 Hz, 1H), 7.97 (s, 1H) , 7.81- 7.69 (m, 2H) , 7.04 (d, J = 8 Hz , 2H) , 3.93 (s,3H) ; <sup>13</sup>C NMR ( 100 MHz, CDCl<sub>3</sub> ), δ(ppm) = 192.9 , 190.4 , 164.2, 142.7 , 141.7 , 131.8 , 131.5 , 131.3 , 131.0 , 130.9 , 130.7 , 128.8 , 127.9 , 127.8 , 125.1 , 124.6 , 121.9 , 114.2 , 55.6 ; HRMS (ESI/TOF-Q) M/Z : [M+H]<sup>+</sup> Calcd. for [C<sub>21</sub>H<sub>14</sub>O<sub>3</sub>] : 314.0943 ; Found : 314.0949 .

*(E)*-2-(2-(2-methoxyphenyl)-2-oxoethylidene)acenaphthylen-1(2*H*)-one (Table 2, entry 4, **3ad**)

Yellow solid, Yield: 89% ; Rf : 0.3 (10% Ethyl Acetate in Petroleum Ether ) ; M.P. = 131-133 °C; <sup>1</sup>H NMR (400 MHz, CDCl<sub>3</sub>): δ (ppm) = 8.82 (d, J = 8 Hz , 1H), 8.14 ( d, J = 8 Hz , 1H) ,8.08 (d, J = 4 Hz , 1H ) , 8.00 (d, J = 12 Hz, 1H) , 7.91 (s, 1H), 7.89 (d, J = 8Hz, 1H), 7.78-7.70 (m , 2H), 7.56 (t, 1H) , 7.12 (t, 1H), 7.05 (t, 1H), 3.95 (s, 3H) ; <sup>13</sup>C NMR (100 MHz, CDCl<sub>3</sub> ), δ(ppm) = 193.5 , 192.8 , 159.2 , 142.6 , 139.9 , 134.5 , 131.7 , 131.6 , 131.2 , 130.9 , 130.6 , 128.9 , 128.8 , 128.7 , 127.8 , 127.7 , 125.0 , 121.7 , 120.9 , 111.9 , 55.9 ; HRMS (ESI/TOF-Q) M/Z : [M+H]<sup>+</sup> Calcd. for [C<sub>21</sub>H<sub>14</sub>O<sub>3</sub>] : 314.0943 ; Found : 314.0948 .

*(E)*-2-(2-(4-ethoxyphenyl)-2-oxoethylidene)acenaphthylen-1(2*H*)-one (Table 2, entry 5, **3ae**)

Yellow solid, Yield: 91% ; Rf : 0.25 (10% Ethyl Acetate in Petroleum Ether ) ; M.P. = 138-140 °C ; <sup>1</sup>H NMR (300 MHz, CDCl<sub>3</sub>): δ (ppm) = 8.62 (d, J = 6 Hz ,

1H), 8.15 (t, 3H), 8.09 (d, J = 6 Hz, 1H), 7.99 (d, J = 6 Hz, 1H), 7.94 (s, 1H), 7.76 (t, 1H), 7.69 (t, 1H), 7.01 (d, J = 9 Hz, 2H), 4.19- 4.12 (m, 2H), 1.48 (t, 3H) ; <sup>13</sup>C NMR (75 MHz, CDCl<sub>3</sub>), δ(ppm) = 192.8, 190.3, 163.6, 141.6, 132.6, 131.8, 131.4, 131.3, 131.0, 130.8, 130.6, 128.8, 128.5, 127.8, 127.8, 125.1, 124.6, 122.1, 121.9, 114.6, 63.9, 14.7 ; HRMS (ESI/TOF-Q) M/Z : [M+H]<sup>+</sup> Calcd. for [C<sub>22</sub>H<sub>16</sub>O<sub>3</sub>] : 328.1099 ; Found : 328.1090.

*(E)*-2-(2-oxo-2-(4-propoxyphenyl)ethylidene)acenaphthylen-1(2H)-one (Table 2, entry 6, **3af**)

Yellow solid, Yield: 90% ; Rf : 0.2 (12% Ethyl Acetate in Petroleum Ether) ; M.P. = 143-145 °C ; <sup>1</sup>H NMR (300 MHz, CDCl<sub>3</sub>): δ (ppm) = 8.63 (d, J = 6 Hz, 1H), 8.18- 8.10 (m, 4H), 8.00 (d, J = 9 Hz, 1H), 7.96 (s, 1H), 7.80 – 7.68 (m, 2H), 7.02 (d, J = 6 Hz, 1H), 4.04 (t, 2H), 1.91 – 1.84 (m, 2H), 1.08 (t, 3H) ; <sup>13</sup>C NMR (75 MHz, CDCl<sub>3</sub>), δ(ppm) = 192.9, 190.4, 163.8, 141.6, 131.8, 131.5, 131.3, 130.9, 130.8, 130.7, 130.6, 128.8, 127.8, 127.8, 125.1, 124.7, 121.9, 114.6, 114.1, 69.9, 22.5, 10.4 ppm ; HRMS (ESI/TOF-Q) M/Z : [M+H]<sup>+</sup> Calcd. for [C<sub>23</sub>H<sub>18</sub>O<sub>3</sub>] : 342.1256 ; Found : 342.1258.

*(E)*-2-(2-(4-hydroxyphenyl)-2-oxoethylidene)acenaphthylen-1(2H)-one (Table 2, entry 7, **3ag**)

Yellow solid, Yield: 90% ; Rf : 0.2 ( 8% Ethyl Acetate in Petroleum Ether ) ; M.P. = 152-154 °C ; <sup>1</sup>H NMR (400 MHz, CDCl<sub>3</sub>): δ (ppm) = 10.81 (s, 1H), 8.62 (d, J = 8 Hz, 1H), 8.17 (d, J = 8 Hz, 2H), 8.14 (d, J = 8 Hz, 1H), 8.09 (d, J = 8 Hz, 1H), 8.01 (d, J = 8 Hz, 1H), 7.96 (s, 1H), 7.79 - 7.69 (m, 2H), 7.03 (d, J = 8 Hz, 2H) ; <sup>13</sup>C NMR ( 100 MHz, CDCl<sub>3</sub> ), δ(ppm) = 192.8, 190.3, 157.1, 141.5, 131.7, 131.4, 131.3, 130.8, 130.8, 130.6, 130.6, 128.7, 127.8, 127.8, 125.0, 124.7, 121.9, 114.6, 114.1 ; HRMS (ESI/TOF-Q) M/Z : [M+H]<sup>+</sup> Calcd. for [C<sub>20</sub>H<sub>12</sub>O<sub>3</sub>] : 300.0786 ; Found : 300.0780 .

*(E)*-2-(2-(3-hydroxyphenyl)-2-oxoethylidene)acenaphthylen-1(2H)-one (Table 2, entry 8, **3ah**)

Yellow solid, Yield: 91% ; Rf : 0.2 (10% Ethyl Acetate in Petroleum Ether) ; M.P. = 150-152 °C ; <sup>1</sup>H NMR (300 MHz, CDCl<sub>3</sub>): δ (ppm) = 8.71 (d, J = 6 Hz, 1H), 8.17 (d, J = 6 Hz, 1H), 8.13 (d, J = 3 Hz, 1H), 8.03 (d, J = 6 Hz, 1H), 7.97 (s, 1H), 7.81- 7.73 (m, 2H), 7.70 (d, J = 6 Hz, 2H), 7.45 (t, 1H), 7.17 (d, J = 6 Hz, 1H) ; <sup>13</sup>C NMR ( 75 MHz, CDCl<sub>3</sub> ), δ(ppm) = 192.6, 190.3, 156.3, 132.0, 130.7, 130.3, 128.8, 128.2, 127.9, 125.3, 123.9, 122.1, 121.5, 121.1, 115.0 ;

HRMS (ESI/TOF-Q) M/Z : [M+H]<sup>+</sup> Calcd. for [C<sub>20</sub>H<sub>12</sub>O<sub>3</sub>] : 300.0786 ; Found : 300.0789 .

*(E)*-2-(2-(4-chlorophenyl)-2-oxoethylidene)acenaphthylen-1(2H)-one (Table 2, entry 9, **3ai**)

Yellow solid, Yield: 93% ; Rf : 0.2 (8% Ethyl Acetate in Petroleum Ether ) ; M.P. = 151-153 °C ; <sup>1</sup>H NMR (400 MHz, CDCl<sub>3</sub>): δ (ppm) = 8.76 (d, J = 9 Hz , 1H), 8.17 (d, J= 12 Hz, 2H) ,8.12 (d, J = 6 Hz, 2H), 8.05 (d, J = 6 Hz, 1H), 7.94 (s, 1H) , 7.83- 7.72 (m, 2H) , 7.55 (d, J = 6 Hz, 2H) ; <sup>13</sup>C NMR ( 100 MHz, CDCl<sub>3</sub> ), δ(ppm) = 192.6 , 190.5 , 143.1 , 142.9 , 140.3 , 136.3 , 131.9 , 131.2 , 130.7 , 130.6 , 130.2 , 129.3 , 128.8 , 128.4 , 128.0 , 125.5 , 123.0 , 121.1 ; HRMS (ESI/TOF-Q) M/Z : [M+H]<sup>+</sup> Calcd. for [C<sub>20</sub>H<sub>11</sub>ClO<sub>2</sub>] : 318.0448 ; Found : 318.0448.

*(E)*-2-(2-(2-chlorophenyl)-2-oxoethylidene)acenaphthylen-1(2H)-one (Table 2, entry 10, **3aj**)

White solid, Yield: 91% ; Rf : 0.25 (10% Ethyl Acetate in Petroleum Ether ) ; M.P. = 150-152 °C ; <sup>1</sup>H NMR (400 MHz, CDCl<sub>3</sub>): δ (ppm) = 8.98 (d, J = 8 Hz , 1H), 8.16 (d, J = 8 Hz , 1H) ,8.09 (d, J = 8 Hz , 1H) , 8.05 (d, J = 8 Hz, 1H) , 7.79-7.75 (m , 3H), 7.73 (s , 1H) ,7.51 (d, J = 4 Hz , 2H) , 7.45- 7.41 (m, 1H) ; <sup>13</sup>C NMR (100 MHz, CDCl<sub>3</sub> ), δ(ppm) = 192.9 , 191.0 , 150.0 , 143.2 , 142.2 , 139.2 , 132.7 , 132.2 , 131.9 , 131.2 , 130.8 , 130.7 , 130.2 , 128.9 , 128.6 , 127.9 , 127.2 , 125.9 , 125.6 , 122.0 ; HRMS (ESI/TOF-Q) M/Z : [M+H]<sup>+</sup> Calcd. for [C<sub>20</sub>H<sub>11</sub>ClO<sub>2</sub>] : 318.0448 ; Found : 318.0443.

*(E)*-2-(2-(2,4-dichlorophenyl)-2-oxoethylidene)acenaphthylen-1(2H)-one (Table 2, entry 11, **3ak**)

Yellow solid, Yield: 93% ; Rf : 0.3 (12% Ethyl Acetate in Petroleum Ether ) ; M.P. = 155-157 °C ; <sup>1</sup>H NMR (300 MHz, CDCl<sub>3</sub>): δ (ppm) = 8.99 (d, J = 9 Hz , 1H), 8.19 (d, J = 6 Hz , 1H) ,8.10 (t , 2H) , 7.83-7.77 (m , 2H), 7.73 (d, J = 9 Hz, 1H) ,7.70 (s,1H) , 7.55 (d, J = 3 Hz, 1H) , 7.43 (d, J = 6 Hz , 1H) ; <sup>13</sup>C NMR ( 75 MHz, CDCl<sub>3</sub> ), δ(ppm) = 192.7 , 191.7 , 143.4 , 142.7 , 138.4 , 137.5 , 131.9 , 131.3 , 131.2 , 130.7 , 128.9 , 128.8 , 128.0 , 127.6 , 126.0 , 125.0 , 122.1 ; HRMS (ESI/TOF-Q) M/Z : [M+H]<sup>+</sup> Calcd. for [C<sub>20</sub>H<sub>10</sub>Cl<sub>2</sub>O<sub>2</sub>] : 352.0058 ; Found : 352.0055.



*(E)*-2-(2-(4-bromophenyl)-2-oxoethylidene)acenaphthylen-1(2H)-one (Table 2, entry 12, **3al**)

Yellow solid, Yield: 90% ; Rf : 0.2 (10% Ethyl Acetate in Petroleum Ether ) ; M.P. = 158-160 °C ; <sup>1</sup>H NMR (400 MHz, CDCl<sub>3</sub>): δ (ppm) = 8.76 (d, J = 8 Hz , 1H), 8.19 (d, J = 8 Hz , 1H), 8.13 (d, J = 8 Hz , 1H), 8.08-8.04 (m , 3H), 7.94 (s, 1H), 7.83-7.74 (m, 2H), 7.72 (d, J = 8Hz , 2H) ; <sup>13</sup>C NMR (100 MHz, CDCl<sub>3</sub> ), δ(ppm) = 190.7 , 188.1 , 145.9 , 143.7 , 134.2 , 132.7 , 132.7 , 132.5 , 131.9 , 131.7 , 130.8 , 130.5 , 130.2 , 129.0 , 128.5 , 128.5 , 126.8 , 126.1 , 123.3 , 122.1 ; HRMS (ESI/TOF-Q) M/Z : [M+H]<sup>+</sup> Calcd. for [C<sub>20</sub>H<sub>11</sub>BrO<sub>2</sub>] : 361.9942 ; Found : 361.9949 .

*(E)*-2-(2-(3-bromophenyl)-2-oxoethylidene)acenaphthylen-1(2H)-one (Table 2, entry 13, **3am**)

Yellow solid, Yield: 89% ; Rf : 0.3 (12% Ethyl Acetate in Petroleum Ether ) ; M.P. = 155-157 °C ; <sup>1</sup>H NMR (400 MHz, CDCl<sub>3</sub>): δ (ppm) = 8.79 (d, J = 4 Hz , 1H), 8.33 (d, J = 4 Hz, 1H) ,8.18 (d, J = 8 Hz, 1H), 8.13 (d, J = 8 Hz, 2H), 8.06 (d, J = 8 Hz, 1H), 7.93 (s, 1H) , 7.83- 7.74 (m, 3H) , 7.46 (t , 1H) , ; <sup>13</sup>C NMR ( 100 MHz, CDCl<sub>3</sub> ), δ(ppm) = 192.6 , 190.3 , 143.3 , 143.2 , 139.7 , 136.5 , 132.0 , 131.7 , 131.2 , 130.7 , 130.6 , 130.5 , 128.8 , 128.5 , 128.0 , 127.4 , 125.6 , 123.3 , 122.7 , 122.2 ; HRMS (ESI/TOF-Q) M/Z : [M+H]<sup>+</sup> Calcd. for [C<sub>20</sub>H<sub>11</sub>BrO<sub>2</sub>] : 361.9942 ; Found : 361.9940 .

*(E)*-2-(2-(2-bromophenyl)-2-oxoethylidene)acenaphthylen-1(2H)-one (Table 2, entry 14, **3an**)

Yellow solid, Yield: 87% ; Rf : 0.2 (12% Ethyl Acetate in Petroleum Ether ) ; M.P. = 159-161 °C ; <sup>1</sup>H NMR (400 MHz, CDCl<sub>3</sub>): δ (ppm) = 9.03 (d, J = 4 Hz , 1H), 8.18 (d, J = 8 Hz , 1H), 8.11 (d, J = 4 Hz , 1H), 8.08 (d, J = 8 Hz , 1H), 7.79 (t, 2H), 7.73 – 7.69 (m, 3H), 7.48 (t, 1H), 7.41 (t, 1H) ; <sup>13</sup>C NMR (100 MHz, CDCl<sub>3</sub> ), δ(ppm) = 193.7 , 192.8 , 143.3 , 142.4 , 141.3 , 133.9 , 132.6 , 131.9 , 131.2 , 130.8 , 130.7 , 130.0 , 128.9 , 128.7 , 127.9 , 127.7 , 126.1 , 125.3 , 122.1 , 120.2 ; HRMS (ESI/TOF-Q) M/Z : [M+H]<sup>+</sup> Calcd. for [C<sub>20</sub>H<sub>11</sub>BrO<sub>2</sub>] : 361.9942 ; Found : 361.9948 .

*(E)*-2-(2-(4-iodophenyl)-2-oxoethylidene)acenaphthylen-1(2H)-one (Table 2, entry 15, **3ao**)

Yellow solid, Yield: 88% ; Rf : 0.3 (10% Ethyl Acetate in Petroleum Ether ) ; M.P. = 163-165 °C ; <sup>1</sup>H NMR (300 MHz, CDCl<sub>3</sub>): δ (ppm) = 8.76 (d, J = 9 Hz , 1H), 8.17 (d, J = 9 Hz , 1H), 8.11 (d, J = 6 Hz , 1H), 8.04 (d, J = 9 Hz , 1H), 7.94 (d, J = 9 Hz , 1H), 7.90 (s, 1H), 7.88 (d, J = 6 Hz , 2H), 7.81 – 7.71 (m, 2H) ; <sup>13</sup>C NMR

(75 MHz, CDCl<sub>3</sub>),  $\delta$ (ppm) = 192.6, 190.9, 143.1, 143.0, 138.2, 137.3, 131.9, 131.2, 130.7, 130.1, 128.8, 128.4, 127.9, 125.5, 122.8, 122.1, 102.0; HRMS (ESI/TOF-Q) M/Z : [M+H]<sup>+</sup> Calcd. for [C<sub>20</sub>H<sub>11</sub>IO<sub>2</sub>] : 409.9804; Found : 409.9805.

*(E)*-2-(2-(4-fluorophenyl)-2-oxoethylidene)acenaphthylen-1(2H)-one (Table 2, entry 16, **3ap**)

Yellow solid, Yield: 96% ; Rf : 0.2 (12% Ethyl Acetate in Petroleum Ether ) ; M.P. = 139-141 °C ; <sup>1</sup>H NMR (400 MHz, CDCl<sub>3</sub>):  $\delta$  (ppm) = 8.72 (d, J = 8 Hz, 1H), 8.25 (d, J = 4 Hz, 1H), 8.22 (d, J = 8 Hz, 1H), 8.17 (d, J = 8 Hz, 1H), 7.94 (s, 1H), 7.82- 7.72 (m, 2H), 7.25 (t, 2H), ; <sup>13</sup>C NMR (100 MHz, CDCl<sub>3</sub>),  $\delta$ (ppm) = 190.6, 185.0, 145.6, 143.6, 132.7, 132.0, 131.9, 131.9, 131.8, 130.8, 130.1, 129.9, 129.0, 128.5, 126.8, 125.9, 123.2, 116.6, 116.4 ; HRMS (ESI/TOF-Q) M/Z : [M+H]<sup>+</sup> Calcd. for [C<sub>20</sub>H<sub>11</sub>FO<sub>2</sub>] : 302.0743 ; Found : 302.0748.

*(E)*-2-(2-oxo-2-(4-(trifluoromethyl)phenyl)ethylidene)acenaphthylen-1(2H)-one (Table 2, entry 17, **3aq**)

White solid, Yield: 95% ; Rf : 0.25 (15% Ethyl Acetate in Petroleum Ether ) ; M.P. = 163-165 °C ; <sup>1</sup>H NMR (400 MHz, CDCl<sub>3</sub>):  $\delta$  (ppm) = 8.23 (d, J = 8 Hz, 1H), 8.07 (d, J = 8 Hz, 1H), 8.01 (d, J = 8 Hz, 1H), 7.95-7.88 (m, 2H), 7.80 (d, J = 8 Hz, 1H), 7.76 (t, 1H), 7.69- 7.65 (m, 3H), 7.62 (t, 1H) ; <sup>13</sup>C NMR (100 MHz, CDCl<sub>3</sub>),  $\delta$ (ppm) = 204.2, 196.8, 142.1, 133.5, 131.2, 129.5, 128.2, 128.0, 127.9, 126.7, 126.6, 125.2, 125.0, 124.5, 124.1, 124.0, 124.0, 123.1, 123.0, 121.1 ; HRMS (ESI/TOF-Q) M/Z : [M+H]<sup>+</sup> Calcd. for [C<sub>21</sub>H<sub>11</sub>F<sub>3</sub>O<sub>2</sub>] : 352.0711 ; Found : 352.0710.

*(E)*-2-(2-(naphthalen-2-yl)-2-oxoethylidene)acenaphthylen-1(2H)-one (Table 2, entry 18, **3ar**)

Yellow solid, Yield: 94% ; Rf : 0.3 (10% Ethyl Acetate in Petroleum Ether ) ; M.P. = 146-148 °C ; <sup>1</sup>H NMR (300 MHz, CDCl<sub>3</sub>):  $\delta$  (ppm) = 8.89 (d, J = 9 Hz, 1H), 8.81 (d, J = 9 Hz, 1H), 8.19 (d, J = 9 Hz, 1H), 8.13 (d, J = 6 Hz, 2H), 8.09-7.96 (m, 3H), 7.91 (s, 1H), 7.80 (t, 1H), 7.76-7.68 (m, 2H), 7.65-7.56 (m, 2H) ; <sup>13</sup>C NMR (75 MHz, CDCl<sub>3</sub>),  $\delta$ (ppm) = 194.9, 192.8, 143.0, 142.0, 135.7, 134.0, 133.9, 131.9, 131.4, 130.8, 130.7, 130.5, 130.0, 128.8, 128.7, 128.5, 128.2, 127.9, 12.1, 126.8, 125.8, 125.4, 124.6, 122.0 ; HRMS (ESI/TOF-Q) M/Z : [M+H]<sup>+</sup> Calcd. for [C<sub>24</sub>H<sub>14</sub>O<sub>2</sub>] : 334.0994 ; Found : 334.0999.

*(E)*-2-(2-oxo-2-(thiophen-3-yl)ethylidene)acenaphthylen-1(2H)-one (Table 2, entry 19, **3as**)

Yellow solid, Yield: 88% ; Rf : 0.2 (10% Ethyl Acetate in Petroleum Ether ) ; M.P. = 121-123 °C ; <sup>1</sup>H NMR (300 MHz, CDCl<sub>3</sub>): δ (ppm) = 8.91 (d, J = 9 Hz , 1H), 8.38 (s,1H), 8.17 (d, J = 9 Hz , 1H) , 8.11 (d, J = 9 Hz , 1H ) , 8.04 (d, J = 9 Hz, 1H) , 7.88 (s, 1H), 7.80 – 7.73 (m, 3H), 7.44 (d, J = 3 Hz, 1H) ; <sup>13</sup>C NMR (75 MHz, CDCl<sub>3</sub> ), δ(ppm) = 192.9 , 185.1 , 143.6 , 143.1 , 142.4 , 133.7 , 131.9 , 131.3 , 130.8 , 130.7 , 128.8 , 128.3 , 127.9 , 127.3 , 127.0 , 125.9 , 123.9 , 122.0 ; HRMS (ESI/TOF-Q) M/Z : [M+H]<sup>+</sup> Calcd. for [C<sub>18</sub>H<sub>10</sub>O<sub>2</sub>S] : 290.0402 ; Found : 290.0408.

*methyl (E)-2-(2-oxoacenaphthylen-1(2H)-ylidene)acetate*(Table 4, entry 1, **3ba**)

Yellow solid, Yield: 92% ; Rf : 0.25 (10% Ethyl Acetate in Petroleum Ether ) ; M.P. = 122-124 °C ; <sup>1</sup>H NMR (300 MHz, CDCl<sub>3</sub>): δ (ppm) = 8.93 (d, J = 9 Hz , 1H), 8.16 (d, J = 9 Hz , 1H) , 8.07 (d, J = 6 Hz , 1H ) , 8.02 (d, J = 9 Hz, 1H) , 7.79- 7.73 (m, 2H), 6.99 (s, 1H), 3.94 (s,3H) ; <sup>13</sup>C NMR (75 MHz, CDCl<sub>3</sub> ), δ(ppm) = 192.1 , 166.8 , 143.9 , 143.0 , 131.8 , 131.1 , 130.6 , 130.4 , 128.8 , 128.0 , 127.9 , 126.3 , 122.0 , 119.7 , 52.2 ; HRMS (ESI/TOF-Q) M/Z : [M+H]<sup>+</sup> Calcd. for [C<sub>15</sub>H<sub>10</sub>O<sub>3</sub>] : 238.0630 ; Found : 238.0637.

*ethyl (E)-2-(2-oxoacenaphthylen-1(2H)-ylidene)acetate*(Table 4, entry 2, **3bb**)

Yellow solid, Yield: 90% ; Rf : 0.2 (10% Ethyl Acetate in Petroleum Ether ) ; M.P. = 127-129 °C ; <sup>1</sup>H NMR (300 MHz, CDCl<sub>3</sub>): δ (ppm) = 8.86 (d, J = 6 Hz , 1H), 8.08 (d, J = 3 Hz , 1H), 8.00- 7.9(m , 2H), 7.74- 7.66 (m, 2H), 6.94 (d, J = 6Hz , 1H), 4.42-4.35 (m, 2H), 1.42 (t, 3H) ; <sup>13</sup>C NMR (75 MHz, CDCl<sub>3</sub> ), δ(ppm) = 192.0 , 166.3 , 143.6 , 142.8 , 131.7 , 131.1 , 130.5 , 130.4 , 128.8 , 127.9 , 127.8 , 126.3 , 121.9 , 120.2 , 61.2 , 14.3 ; HRMS (ESI/TOF-Q) M/Z : [M+H]<sup>+</sup> Calcd. for [C<sub>16</sub>H<sub>12</sub>O<sub>3</sub>] : 252.0786 ; Found : 252.0789.

*tert-butyl (E)-2-(2-oxoacenaphthylen-1(2H)-ylidene)acetate* (Table 4, entry 3, **3bc**)

Yellow solid, Yield: 89% ; Rf : 0.2 (8% Ethyl Acetate in Petroleum Ether ) ; M.P. = 133-135 °C ; <sup>1</sup>H NMR (400 MHz, CDCl<sub>3</sub>): δ (ppm) = 8.66 (d, J = 8 Hz , 1H), 8.13 (d, J = 8 Hz , 1H), 7.96 (d, J = 8 Hz , 1H), 7.92 (d, J = 4 Hz , 1H), 7.83 (d, J = 8 Hz , 1H), 7.68 (t,1H), 7.57 (t, 1H) 7.73 – 7.69 (m, 3H), 7.48 (t, 1H), 7.41 (t, 1H) , 1.42 (s, 9H) ; <sup>13</sup>C NMR (100 MHz, CDCl<sub>3</sub> ), δ(ppm) = 188.0 , 165.3 , 145.6 , 142.4 , 132.7 , 131.7 , 128.7 , 128.4 , 127.7 , 127.6 , 125.9 , 122.3 , 121.9 , 121.7 , 81.7 , 28.0 ; HRMS (ESI/TOF-Q) M/Z : [M+H]<sup>+</sup> Calcd. for [C<sub>18</sub>H<sub>16</sub>O<sub>3</sub>] : 280.1099 ; Found : 280.1095.

*benzyl (E)-2-(2-oxoacenaphthylen-1(2H)-ylidene)acetate* (Table 4, entry 4, **3bd**)

Yellow solid, Yield: 91% ; Rf : 0.3 ( 12% Ethyl Acetate in Petroleum Ether ) ; M.P. = 142-144 °C ; <sup>1</sup>H NMR (300 MHz, CDCl<sub>3</sub>): δ (ppm) = 8.92 (d, J = 6 Hz, 1H), 8.16 (d, J = 9 Hz, 1H) , 8.08-8.01 ( m , 2H) , 7.80- 7.72 (m, 2H) , 7.48 (t, 2H) , 7.45-7.38 (m, 3H) , 7.05 (s, 1H) , 5.38 (s, 2H) ; <sup>13</sup>C NMR (75 MHz, CDCl<sub>3</sub> ) , δ(ppm) =192.0 , 166.1 , 144.1 , 143.0 , 135.6 , 131.8 , 131.1 , 130.6 , 130.4 , 128.8 , 128.7 , 128.5 , 128.4 , 128.1 , 127.9 , 126.4 , 122.0 , 119.8 , 66.9 ; HRMS (ESI/TOF-Q) M/Z : [M+H]<sup>+</sup> Calcd. for [C<sub>21</sub>H<sub>14</sub>O<sub>3</sub>] : 314.0943 ; Found : 314.0949.

*(Z)-2-(1-nitro-2-oxo-2-phenylethylidene)acenaphthylen-1(2H)-one* (Table 6, entry 1, **5aa**)

Orange solid, Yield: 86% ; Rf : 0.2 ( 12% Ethyl Acetate in Petroleum Ether ) ; M.P. = 198-200 °C ; <sup>1</sup>H NMR (300 MHz, CDCl<sub>3</sub>): δ (ppm) = 8.40 (d, J = 6 Hz, 1H) , 8.23 ( d, J = 6 Hz, 1H), 8.21- 8.09 ( m, 3H) , 7.98 ( d, J = 6Hz , 1H), 7.86-7.77 (m, 2H), 7.67 (t, 1H), 7.54 (t, 2H) ; <sup>13</sup>C NMR ( 75 MHz, CDCl<sub>3</sub> ) , δ(ppm) = 190.6 , 186.4 , 143.5 , 135.2 , 134.6 , 132.6 , 130.8 , 130.4 , 130.0 , 130.0 , 129.6 , 129.2 , 129.1 , 129.0 , 128.5 , 127.0 , 125.8 , 123.1 ; HRMS (ESI/TOF-Q) M/Z : [M+H]<sup>+</sup> Calcd. for [C<sub>20</sub>H<sub>11</sub>NO<sub>4</sub>] : 329.0688 ; Found : 329.0681.

*(Z)-2-(1-nitro-2-oxo-2-(p-tolyl)ethylidene)acenaphthylen-1(2H)-one* (Table 6, entry 2, **5ab**)

Orange solid, Yield: 90% ; Rf : 0.3 ( 15% Ethyl Acetate in Petroleum Ether ) ; M.P. = 204-206 °C ; <sup>1</sup>H NMR (400 MHz, CDCl<sub>3</sub>): δ (ppm) = 8.36 (d, J= 8 Hz , 1H) , 8.23 ( d, J= 12 Hz , 1H) , 8.15 (d, J= 8 Hz , 1H) , 7.99 (t , J= 8 Hz , 3H) , 7.85-7.78 (m , 2H) , 7.34 (d, J= 8 Hz , 2H) , 2.46 (s , 3H) ; <sup>13</sup>C NMR ( 100 MHz, CDCl<sub>3</sub> ) , δ(ppm) = 190.6 , 185.9 , 145.9 , 143.4, 132.8 , 132.5 , 132.1 , 130.8 , 130.7 , 130.3 , 130.0 , 129.9 , 129.9 , 129.4 , 129.0 , 128.5 , 127.0 , 125.6 , 123.0 , 21.9 ; HRMS (ESI/TOF-Q) M/Z : [M+H]<sup>+</sup> Calcd. for [C<sub>23</sub>H<sub>11</sub>NO<sub>4</sub>] : 343.0845 ; Found : 343.0847.

*(Z)-2-(2-(4-methoxyphenyl)-1-nitro-2-oxoethylidene)acenaphthylen-1(2H)-one*(Table 6, entry 3, **5ac**)

Orange solid, Yield: 87% ; Rf : 0.2 ( 15% Ethyl Acetate in Petroleum Ether ) ; M.P. = 207-209 °C ; <sup>1</sup>H NMR (400 MHz, CDCl<sub>3</sub>): δ (ppm) = 8.30 (d, J= 4 Hz , 1H), 8.22 (d , J= 8 Hz , 1H) , 8.14 (d, J = 8 Hz , 1H), 8.08 (d , J= 8 Hz, 2H) , 7.99 (d, J= 4Hz, 1H), 7.83- 7.78 (m, 2H ) , 7.01 (d, J = 12 Hz, 2H ) , 3.90 (s, 3H) ;

$^{13}\text{C}$  NMR ( 100 MHz,  $\text{CDCl}_3$  ),  $\delta(\text{ppm}) = 190.5 , 184.6 , 164.8 , 146.6 , 143.1 , 135.2 , 132.5 , 131.8 , 131.7 , 130.8 , 130.1 , 129.7 , 128.9 , 128.5 , 128.3 , 127.5 , 127.0 , 125.2 , 125.0 , 123.0 , 55.6$  ; HRMS (ESI/TOF-Q) M/Z :  $[\text{M}+\text{H}]^+$  Calcd. for  $[\text{C}_{21}\text{H}_{13}\text{NO}_5]$  : 359.0794 ; Found : 359.0790.

*(Z)*-2-(2-(2-methoxyphenyl)-1-nitro-2-oxoethylidene)acenaphthylen-1(2H)-one  
(Table 6, entry 4, **5ad**)

Orange solid, Yield: 86% ; Rf : 0.25 (15% Ethyl Acetate in Petroleum Ether ) ; M.P. = 206-208  $^{\circ}\text{C}$  ;  $^1\text{H}$  NMR (300 MHz,  $\text{CDCl}_3$ ):  $\delta$  (ppm) = 8.63 (d, J = 6 Hz, 1H) , 8.31 (d, J = 6 Hz, 1H), 8.19 (d, J = 6 Hz, 1H), 8.12 (d, J = 6 Hz, 1H), 7.95 (d, J = 6 Hz, 1H) , 7.84-7.73 (m, 2H), 7.60 (t, 1H) 7.20 (t,1H) , 6.96 (d, J = 6 Hz, 1H), 3.74 (s, 3H) ;  $^{13}\text{C}$  NMR ( 75 MHz,  $\text{CDCl}_3$  ),  $\delta(\text{ppm}) = 191.5 , 184.2 , 159.8 , 143.5 , 135.9 , 132.4 , 131.5 , 130.7 , 130.6 , 130.1 , 129.6 , 129.0 , 128.2 , 128.0 , 126.8 , 124.6 , 122.7 , 121.6 , 112.0$  ; HRMS (ESI/TOF-Q) M/Z :  $[\text{M}+\text{H}]^+$  Calcd. for  $[\text{C}_{21}\text{H}_{13}\text{NO}_5]$  : 359.0794 ; Found : 359.0798.

*(Z)*-2-(2-(4-ethoxyphenyl)-1-nitro-2-oxoethylidene)acenaphthylen-1(2H)-one  
(Table 6, entry 5, **5ae**)

Orange solid, Yield: 87% ; Rf : 0.2 (12% Ethyl Acetate in Petroleum Ether ) ; M.P. = 210-212  $^{\circ}\text{C}$  ;  $^1\text{H}$  NMR (300 MHz,  $\text{CDCl}_3$ ):  $\delta$  (ppm) = 8.29 (d, J = 9 Hz ,1H), 8.21 (d, J = 3 Hz ,1H), 8.13 (d, J = 6 Hz, 1H), 8.06 (d, J = 9 Hz ,4H), 7.98 (d, J = 6 Hz ,1H), 7.83- 7.77 (m ,2H) , 4.18-4.09 (m, 2H) , 1.47 (t, 3H) ;  $^{13}\text{C}$  NMR ( 75 MHz,  $\text{CDCl}_3$  ),  $\delta(\text{ppm}) = 190.4 , 184.7 , 164.3 , 143.1 , 133.3 , 132.4 , 132.3 , 132.1 , 132.0 , 131.8 , 129.7 , 129.0 , 128.4 , 125.1 , 124.6 , 123.2 , 123.0 , 115.0 , 114.9 , 114.1 , 64.0 , 14.6$  ; HRMS (ESI/TOF-Q) M/Z :  $[\text{M}+\text{H}]^+$  Calcd. for  $[\text{C}_{22}\text{H}_{15}\text{NO}_5]$  : 373.0950 ; Found : 373.0958.

*(Z)*-2-(1-nitro-2-oxo-2-(4-propoxyphenyl)ethylidene)acenaphthylen-1(2H)-one  
(Table 6, entry 6, **5af**)

Orange solid, Yield: 89% ; Rf : 0.3 (20% Ethyl Acetate in Petroleum Ether ) ; M.P. =215-217  $^{\circ}\text{C}$  ;  $^1\text{H}$  NMR (400 MHz,  $\text{CDCl}_3$ ):  $\delta$  (ppm) = 8.28 (d, J = 8 Hz, 1H), 8.22 (d, J = 8 Hz, 1H), 8.14 (d, J = 8 Hz, 1H), 8.06 (d, J = 8 Hz, 1H), 7.98 (d, J = 8 Hz, 1H), 7.80 (d, J = 8 Hz, 2H), 6.99 (d, J= 4 Hz, 2H), 4.02 (t, 2H), 1.88-1.82 (m 2H), 1.06 (t, 3H) ;  $^{13}\text{C}$  NMR ( 100 MHz,  $\text{CDCl}_3$  ),  $\delta(\text{ppm}) = 190.4 , 184.5 , 164.5 , 143.1 , 133.2 , 132.4 , 131.8 , 130.8 , 130.2 , 129.7 , 128.9 , 128.4 , 128.0 , 127.0 ,$

125.1 , 123.0 , 114.9 , 69.9 , 22.4 , 10.5 ; HRMS (ESI/TOF-Q) M/Z : [M+H]<sup>+</sup>  
Calcd. for [C<sub>23</sub>H<sub>17</sub>NO<sub>5</sub>] : 387.1107 ; Found : 387.1109.

*(Z)*-2-(2-(4-hydroxyphenyl)-1-nitro-2-oxoethylidene)acenaphthylen-1(2H)-one  
(Table 6, entry 7, **5ag**)

Orange solid, Yield: 86% ; Rf : 0.25 (15% Ethyl Acetate in Petroleum Ether ) ;  
M.P. = 207-209 °C; <sup>1</sup>H NMR (400 MHz, CDCl<sub>3</sub>): δ (ppm) = 11.04 (s, 1H), 8.77 (d, J = 4 Hz, 1H), 8.47 (d, J = 8 Hz, 1H) , 8.34 (d, J = 8 Hz , 1H), 8.25 (d, J = 8 Hz, 1H), 8.19 (d , J = 8 Hz, 1H), 7.98 (d, J = 8 Hz, 1H), 7.87-7.79 (m, 2H) , 7.34 (d, J = 8Hz, 1H) ; <sup>13</sup>C NMR ( 100 MHz, CDCl<sub>3</sub> ), δ(ppm) = 190.8 , 183.8 , 159.2 , 143.9 , 137.0 , 133.5 , 133.3 , 132.9 , 130.8 , 130.5 , 129.6 , 129.1 , 128.6 , 128.5 , 128.5 , 127.7 , 127.1 , 126.6 , 123.3 , 121.3 ; HRMS (ESI/TOF-Q) M/Z : [M+H]<sup>+</sup> Calcd. for [C<sub>20</sub>H<sub>11</sub>NO<sub>5</sub>] : 345.0637 ; Found : 345.0630.

*(Z)*-2-(2-(3-hydroxyphenyl)-1-nitro-2-oxoethylidene)acenaphthylen-1(2H)-one  
(Table 6, entry 8, **5ah**)

Orange solid, Yield: 85% ; Rf : 0.3 (20% Ethyl Acetate in Petroleum Ether ) ; M.P. = 203-205 °C; <sup>1</sup>H NMR (400 MHz, CDCl<sub>3</sub>): δ (ppm) = 10.61 ( s, 1H ), 8.92 ( d, J = 12 Hz , 1H ), 8.32 (d, J = 12 Hz , 1H ), 8.21 ( d, J = 12 Hz , 1H), 8.16-8.09 ( m, 2H ), 7.96 (d, J = 4Hz , 1H), 7.91 (s, 1H) , 7.5-7.74 ( m, 3H) ; <sup>13</sup>C NMR ( 100 MHz, CDCl<sub>3</sub> ), δ(ppm) = 192.4 , 186.2 , 155.1 , 144.4 , 143.6 , 132.0 , 130.7 , 129.1 , 128.8 , 128.0 , 126.0 , 125.9 , 122.3 , 121.4 , 120.6 , 119.5 ; HRMS (ESI/TOF-Q) M/Z : [M+H]<sup>+</sup> Calcd. for [C<sub>20</sub>H<sub>11</sub>NO<sub>5</sub>] : 345.0637 ; Found : 345.0635.

*(Z)*-2-(2-(4-chlorophenyl)-1-nitro-2-oxoethylidene)acenaphthylen-1(2H)-one  
(Table 6, entry 9, **5ai**)

Orange solid, Yield: 88% ; Rf : 0.25 (15% Ethyl Acetate in Petroleum Ether ) ;  
M.P. = 208-210 °C ; <sup>1</sup>H NMR (300 MHz, CDCl<sub>3</sub>): δ (ppm) = 8.43(d, J= 9 Hz , 1H) , 8.24 (d, J= 6 Hz , 1H) , 8.18 ( d , J= 9 Hz , 1H ) , 8.04-7.98 (m, 3H ) , 7.87-7.79 (m , 2H ) , 7.52 (d, J = 9 Hz , 2H) ; <sup>13</sup>C NMR ( 75 MHz, CDCl<sub>3</sub> ), δ(ppm) = 190.7 , 185.5 , 143.7 , 141.1, 133.8 , 132.8 , 132.7 , 130.8 , 130.5 , 130.2 , 129.8, 129.5 , 129.0 , 128.5 , 126.8 , 126.1 , 123.2 ; HRMS (ESI/TOF-Q) M/Z : [M+H]<sup>+</sup> Calcd. for [C<sub>20</sub>H<sub>10</sub>ClNO<sub>4</sub>] : 363.0298 ; Found : 363.0299.

*(Z)*-2-(2-(2-chlorophenyl)-1-nitro-2-oxoethylidene)acenaphthylen-1(2H)-one  
(Table 6, entry 10, **5aj**)

Orange solid, Yield: 87% ; Rf : 0.3 (20% Ethyl Acetate in Petroleum Ether ) ; M.P. = 205-207 °C; <sup>1</sup>H NMR (400 MHz, CDCl<sub>3</sub>): δ (ppm) = 9.09 (d, J = 8 Hz, 1H), 8.70 (d, J = 8 Hz, 1H), 8.58 (d, J = 8 Hz, 1H), 8.53 ( d, J = 8 Hz, 2H ), 8.20 ( t, 3H), 7.79 ( t, 2H), 7.51 (d, J = 8 Hz, 1H ) ; <sup>13</sup>C NMR ( 100 MHz, CDCl<sub>3</sub> ), δ (ppm) = 191.1 , 184.8 , 143.8 , 134.9 , 134.3 , 132.6 , 132.5 , 132.4 , 131.7 , 131.7 , 130.7 , 130.3 , 129.1 , 128.4 , 127.3 127.3 , 126.9 , 125.3 , 124.7 , 123.1 ; HRMS (ESI/TOF-Q) M/Z : [M+H]<sup>+</sup> Calcd. for [C<sub>20</sub>H<sub>10</sub>ClNO<sub>4</sub>] : 363.0298 ; Found : 363.0291.

*(Z)*-2-(2-(2,4-dichlorophenyl)-1-nitro-2-oxoethylidene)acenaphthylen-1(2H)-one (Table 6, entry 11, **5ak**)

Orange solid, Yield: 88% ; Rf : 0.2 (15% Ethyl Acetate in Petroleum Ether ) ; M.P. = 214-216 °C; <sup>1</sup>H NMR (400 MHz, CDCl<sub>3</sub>): δ (ppm) = 8.62 (d, J = 8 Hz, 1H), 8.24 (d, J = 8 Hz, 1H), 8.17 (t, 2 H), 8.00 (d, J = 8 Hz, 1H), 7.87- 7.79 (m, 2H) , 7.53 (d, J = 4 Hz, 1H), 7.45 (d, J = 8 Hz, 1H) ; <sup>13</sup>C NMR ( 100 MHz, CDCl<sub>3</sub> ), δ(ppm) = 191.2 , 183.9 , 144.1 , 140.2 , 135.1 , 133.2 , 132.7 , 132.2 , 131.4 , 130.8 , 130.5 , 129.6 , 129.1 , 128.5 ,127.8 , 127.2 , 125.6 , 124.8 , 123.3 , 122.1 ; HRMS (ESI/TOF-Q) M/Z : [M+H]<sup>+</sup> Calcd. for [C<sub>20</sub>H<sub>9</sub>Cl<sub>2</sub>NO<sub>4</sub>] : 396.9909 ; Found : 396.9905.

*(Z)*-2-(2-(4-bromophenyl)-1-nitro-2-oxoethylidene)acenaphthylen-1(2H)-one (Table 6, entry 12, **5al**)

Orange solid, Yield: 89% ; Rf : 0.3 (20% Ethyl Acetate in Petroleum Ether ) ; M.P. = 220-222 °C; <sup>1</sup>H NMR (400 MHz, CDCl<sub>3</sub>): δ (ppm) = 8.44 (d, J= 12 Hz , 1H) , 8.25 (d, J= 12 Hz , 1H) , 8.18 (d , J = 12 Hz , 1H) , 8.00 (d, J = 8 Hz , 1H), 7.96 (d, J= 12 Hz, 2H) , 7.87-7.79 (m, 2H) , 7.69 (d, J = 12 Hz , 2H) ; <sup>13</sup>C NMR ( 100 MHz, CDCl<sub>3</sub> ), δ(ppm) = 190.7 , 188.1, 145.9 , 143.7 , 134.2 , 132.7 , 132.7 , 132.5 , 131.9 , 131.7, 130.8 , 130.5 , 130.2 , 129.0 , 128.5 , 128.5 , 126.8 , 126.1 , 123.3 , 122.1 ; HRMS (ESI/TOF-Q) M/Z : [M+H]<sup>+</sup> Calcd. for [C<sub>20</sub>H<sub>10</sub>BrNO<sub>4</sub>] : 406.9793 ; Found : 406.9790.

*(Z)*-2-(2-(3-bromophenyl)-1-nitro-2-oxoethylidene)acenaphthylen-1(2H)-one (Table 6, entry 13, **5am**)

Orange solid, Yield: 88% ; Rf : 0.25 (20% Ethyl Acetate in Petroleum Ether ) ; M.P. = 219-221 °C ; <sup>1</sup>H NMR (400 MHz, CDCl<sub>3</sub>): δ (ppm) = 8.49 (d, J= 8 Hz , 1H) , 8.26-8.18 (m , 3H) , 8.01 (d , J = 4 Hz , 2H) , 7.88-7.78 (m , 3H) , 7.42 (t ,

1H) ;  $^{13}\text{C}$  NMR ( 100 MHz,  $\text{CDCl}_3$  ),  $\delta(\text{ppm}) = 190.7$  ,  $185.5$  ,  $145.1$  ,  $143.9$  ,  $137.3$  ,  $137.1$  ,  $133.2$  ,  $132.8$  ,  $131.8$  ,  $130.8$  ,  $130.6$  ,  $130.4$  ,  $129.7$  ,  $129.1$  ,  $128.5$  ,  $127.7$  ,  $126.8$  ,  $126.5$  ,  $123.4$  ,  $123.3$  ; HRMS (ESI/TOF-Q) M/Z :  $[\text{M}+\text{H}]^+$  Calcd. for  $[\text{C}_{20}\text{H}_{10}\text{BrNO}_4]$  : 406.9793 ; Found : 406.9799.

*(Z)*-2-(2-(2-bromophenyl)-1-nitro-2-oxoethylidene)acenaphthylen-1(2H)-one (Table 6, entry 14, **5an**)

Orange solid, Yield: 89% ; Rf : 0.3 (20% Ethyl Acetate in Petroleum Ether ) ; M.P. = 217-219  $^{\circ}\text{C}$  ;  $^1\text{H}$  NMR (400 MHz,  $\text{CDCl}_3$ ):  $\delta$  (ppm) = 9.05 (d, J = 12 Hz, 1H), 8.66 (d, J = 8 Hz, 1H), 8.45 (d, J = 8 Hz, 1H), 8.40 (d, J = 8 Hz, 1H), 8.18 (d, J = 8 Hz, 1H), 8.12 (d, J = 8 Hz, 1H), 7.75 (t, 2H), 7.44 (t, 2H) ;  $^{13}\text{C}$  NMR ( 100 MHz,  $\text{CDCl}_3$  ),  $\delta(\text{ppm}) = 190.8$  ,  $185.3$  ,  $143.62$  ,  $135.4$  ,  $135.3$  ,  $134.7$  ,  $134.2$  ,  $132.7$  ,  $132.6$  ,  $130.3$  ,  $129.0$  ,  $128.5$  ,  $127.8$  ,  $127.7$  ,  $127.6$  ,  $126.5$  ,  $124.9$  ,  $124.8$  ,  $123.2$  ,  $122.6$  ; HRMS (ESI/TOF-Q) M/Z :  $[\text{M}+\text{H}]^+$  Calcd. for  $[\text{C}_{20}\text{H}_{10}\text{BrNO}_4]$  : 406.9793 ; Found : 406.9797.

*(Z)*-2-(2-(4-iodophenyl)-1-nitro-2-oxoethylidene)acenaphthylen-1(2H)-one (Table 6, entry 15, **5ao**)

Orange solid, Yield: 84% ; Rf : 0.25 (12% Ethyl Acetate in Petroleum Ether ) ; M.P. = 223-225  $^{\circ}\text{C}$  ;  $^1\text{H}$  NMR (300 MHz,  $\text{CDCl}_3$ ):  $\delta$  (ppm) = 9.12 (d, J = 9 Hz, 1H) , 8.71(d, J = 9 Hz, 1H), 8.64 (d, J = 6Hz, 1H), 8.37 (d, J = 3 Hz, 1H), 8.34 (d, J = 3 Hz, 1H), 7.90 (d, J= 9 Hz, 3H), 7.81 (d, J = 9 Hz, 2H) ;  $^{13}\text{C}$  NMR ( 75 MHz,  $\text{CDCl}_3$  ),  $\delta(\text{ppm}) = 190.6$  ,  $186.1$  ,  $143.6$  ,  $138.7$  ,  $138.5$  ,  $135.4$  ,  $133.5$  ,  $132.7$  ,  $132.2$  ,  $130.4$  ,  $130.3$  ,  $129.0$  ,  $128.5$  ,  $127.5$  ,  $127.2$  ,  $126.1$  ,  $124.8$  ,  $124.2$  ,  $123.2$  ,  $122.1$  ; HRMS (ESI/TOF-Q) M/Z :  $[\text{M}+\text{H}]^+$  Calcd. for  $[\text{C}_{20}\text{H}_{10}\text{INO}_4]$  : 454.9655 ; Found : 454.9652.

*(Z)*-2-(2-(4-fluorophenyl)-1-nitro-2-oxoethylidene)acenaphthylen-1(2H)-one (Table 6, entry 16, **5ap**)

Orange solid, Yield: 86% ; Rf : 0.2 (15% Ethyl Acetate in Petroleum Ether ) ; M.P. = 207-209  $^{\circ}\text{C}$  ;  $^1\text{H}$  NMR (400 MHz,  $\text{CDCl}_3$ ):  $\delta$  (ppm) = 8.30 (d, J= 8 Hz , 1H) , 8.14 (d, J = 8 Hz , 1H) , 8.08-8.02 (m , 3H) , 7.9 (d, J= 8 Hz , 1H), 7.76-7.71 (m, 2H) ;  $^{13}\text{C}$  NMR ( 100 MHz,  $\text{CDCl}_3$  ),  $\delta(\text{ppm}) = 190.6$  ,  $185.0$  ,  $165.3$  ,  $143.6$  ,  $132.7$  ,  $132.6$  ,  $132.0$  ,  $131.9$  ,  $131.9$  ,  $131.8$  ,  $130.8$  ,  $130.1$  ,  $129.9$  ,  $129.0$  ,  $128.5$  ,  $126.8$  ,  $125.9$  ,  $123.2$  ; HRMS (ESI/TOF-Q) M/Z :  $[\text{M}+\text{H}]^+$  Calcd. for  $[\text{C}_{20}\text{H}_{10}\text{FNO}_4]$  : 347.0594 ; Found : 347.0599.



*(Z)*-2-(1-nitro-2-oxo-2-(4-(trifluoromethyl)phenyl)ethylidene)acenaphthylen-1(2*H*)-one (Table 6, entry 17, **5aq**)

Orange solid, Yield: 88% ; Rf : 0.2 (20% Ethyl Acetate in Petroleum Ether ) ; M.P. = 213-215 °C ; <sup>1</sup>H NMR (400 MHz, CDCl<sub>3</sub>): δ (ppm) = 8.51 (d, J = 8 Hz, 1H), 8.26 (d, J = 8 Hz , 1H) , 8.20 (d, J = 8 Hz, 3H), 8.00 (d, J = 8 Hz, 1H), 7.87 ( t, 1H ), 7.82 ( t, 3H) ; <sup>13</sup>C NMR ( 100 MHz, CDCl<sub>3</sub> ), δ(ppm) = 190.8 , 185.9 , 144.0 , 138.0 , 133.4 , 132.8 130.8 , 130.5 , 129.6 , 129.5 , 129.3 , 129.1 , 128.6 , 126.7 , 126.6 , 126.3 , 126.2 , 126.2 , 126.1 , 123.4 ; HRMS (ESI/TOF-Q) M/Z : [M+H]<sup>+</sup> Calcd. for [C<sub>21</sub>H<sub>10</sub>F<sub>3</sub>NO<sub>4</sub>] : 397.0562 ; Found : 397.0560.

*(Z)*-2-(2-(naphthalen-2-yl)-1-nitro-2-oxoethylidene)acenaphthylen-1(2*H*)-one (Table 6, entry 18, **5ar**)

Orange solid, Yield: 90% ; Rf : 0.3 ( 15% Ethyl Acetate in Petroleum Ether ) ; M.P. = 204-206 °C ; <sup>1</sup>H NMR (400 MHz, CDCl<sub>3</sub>): δ (ppm) = 9.35 (d, J = 8 Hz, 1H), 8.31 (d, J = 8 Hz, 1H), 8.21-8.10 ( m, 4H), 7.97 (d, J = 4 Hz, 1H), 7.92 (d, J = 4 Hz, 1H), 7.82 (t, 2H), 7.76 (t, 1H), 7.67 (t, 1H) , 7.48 (t, 1H) ; <sup>13</sup>C NMR ( 100 MHz, CDCl<sub>3</sub> ), δ(ppm) = 190.7 , 187.2 , 147.7 , 143.2 , 135.6 , 134.1 , 132.6 , 132.5 , 131.7 , 131.6 , 131.1 , 130.8 , 129.8 , 129.5 , 129.0 , 128.7 , 128.5 , 127.2 , 126.3 , 125.2 , 124.3 , 123.0 ; HRMS (ESI/TOF-Q) M/Z : [M+H]<sup>+</sup> Calcd. for [C<sub>24</sub>H<sub>13</sub>NO<sub>4</sub>] : 347.0594 ; Found : 347.0598 .

*(Z)*-2-(1-nitro-2-oxo-2-(thiophen-2-yl)ethylidene)acenaphthylen-1(2*H*)-one (Table 6, entry 19, **5as**)

Orange solid, Yield: 87% ; Rf : 0.3 ( 15% Ethyl Acetate in Petroleum Ether ) ; M.P. = 199-201 °C; <sup>1</sup>H NMR (400 MHz, CDCl<sub>3</sub>): δ (ppm) = 8.31 (d, J = 12 Hz, 2H), 8.27 – 8.20 ( m, 2H), 8.12 (d, J = 8 Hz, 2H), 7.87 (t, 2H) , 7.79 (t, 1H) ; <sup>13</sup>C NMR ( 100 MHz, CDCl<sub>3</sub> ), δ(ppm) = 188.1 , 179.3 , 145.9 , 135.3 , 132.7 , 132.6 , 131.0 , 129.9 , 129.0 , 128.6 , 128.5 , 128.5 , 127.6 , 127.5 , 126.9 , 125.4 , 123.1 , 122.1 ; HRMS (ESI/TOF-Q) M/Z : [M+H]<sup>+</sup> Calcd. for [C<sub>18</sub>H<sub>9</sub>NO<sub>4</sub>S] : 335.0252 ; Found : 335.0251 .

*methyl (Z)*-2-nitro-2-(2-oxoacenaphthylen-1(2*H*)-ylidene)acetate (Table 7, entry 1, **5ba**)

Orange solid, Yield: 88% ; Rf : 0.2 (15% Ethyl Acetate in Petroleum Ether ) ; M.P. = 195-197 °C ; <sup>1</sup>H NMR (400 MHz, CDCl<sub>3</sub>): δ (ppm) = 8.89 (d, J = 8 Hz,

1H), 8.18 (d, J = 8 Hz, 1H), 8.10 (d, J = 8 Hz, 1H), 8.04 (d, J = 8 Hz, 1H), 7.79 (d, J = 8 Hz, 2H), 4.04 (s, 3H); <sup>13</sup>C NMR (100 MHz, CDCl<sub>3</sub>), δ(ppm) = 189.7, 185.0, 160.0, 143.0, 132.6, 132.4, 130.0, 129.0, 128.5, 128.5, 128.4, 128.0, 123.1, 123.0, 54.0; HRMS (ESI/TOF-Q) M/Z: [M+H]<sup>+</sup> Calcd. for [C<sub>15</sub>H<sub>9</sub>NO<sub>5</sub>]: 283.0481; Found: 283.0483.

*ethyl (Z)-2-nitro-2-(2-oxoacenaphthylen-1(2H)-ylidene)acetate* (Table 7, entry 2, **5bb**)

Orange solid, Yield: 90%; R<sub>f</sub>: 0.25 (15% Ethyl Acetate in Petroleum Ether); M.P. = 201-203 °C; <sup>1</sup>H NMR (400 MHz, CDCl<sub>3</sub>): δ (ppm) = 8.37 (d, J = 4 Hz, 1H), 8.15 (t, 2H), 8.10-8.04 (m, 2H), 8.00 (d, J = 8 Hz, 1H), 7.73 (d, J = 8 Hz, 2H), 4.62-4.57 (m, 2H), 1.49 (t, 3H); <sup>13</sup>C NMR (100 MHz, CDCl<sub>3</sub>), δ(ppm) = 189.6, 180.0, 160.1, 143.4, 132.5, 132.3, 130.4, 129.9, 129.0, 128.3, 128.0, 126.9, 123.0, 122.9, 63.6, 13.8; HRMS (ESI/TOF-Q) M/Z: [M+H]<sup>+</sup> Calcd. for [C<sub>16</sub>H<sub>11</sub>NO<sub>5</sub>]: 297.0637; Found: 297.0639.

*tert-butyl (Z)-2-nitro-2-(2-oxoacenaphthylen-1(2H)-ylidene)acetate* (Table 7, entry 3, **5bc**)

Orange solid, Yield: 89%; R<sub>f</sub>: 0.2 (12% Ethyl Acetate in Petroleum Ether); M.P. = 210-212 °C; <sup>1</sup>H NMR (400 MHz, CDCl<sub>3</sub>): δ (ppm) = 8.38 (d, J = 4 Hz, 1H), 8.17 (t, 2H), 8.12-8.02 (m, 2H), 8.00 (d, J = 8 Hz, 1H), 7.74 (d, J = 8 Hz, 2H), 1.44 (s, 9H); <sup>13</sup>C NMR (100 MHz, CDCl<sub>3</sub>), δ(ppm) = 188.9, 165.4, 145.7, 143.1, 132.7, 131.7, 128.7, 128.4, 127.8, 127.7, 125.9, 122.3, 121.9, 121.7, 81.9, 28.1; HRMS (ESI/TOF-Q) M/Z: [M+H]<sup>+</sup> Calcd. for [C<sub>16</sub>H<sub>11</sub>NO<sub>5</sub>]: 325.0950; Found: 325.0955.

*benzyl (Z)-2-nitro-2-(2-oxoacenaphthylen-1(2H)-ylidene)acetate* (Table 7, entry 4, **5bd**)

Orange solid, Yield: 87%; R<sub>f</sub>: 0.3 (20% Ethyl Acetate in Petroleum Ether); M.P. = 217-219 °C; <sup>1</sup>H NMR (300 MHz, CDCl<sub>3</sub>): δ (ppm) = 8.48 (d, J = 9 Hz, 1H), 8.19 (d, J = 9 Hz, 1H), 8.13-8.05 (m, 2H), 7.82-7.73 (m, 2H), 7.52 (d, J = 6 Hz, 2H), 7.42 (d, J = 6 Hz, 3H), 5.56 (s, 2H); <sup>13</sup>C NMR (75 MHz, CDCl<sub>3</sub>), δ(ppm) = 189.7, 160.2, 143.6, 134.4, 132.5, 130.6, 130.6, 129.7, 129.1, 129.0, 128.8, 128.8, 128.7, 128.7, 128.4, 128.4, 127.3, 126.8, 123.1, 69.3; HRMS (ESI/TOF-Q) M/Z: [M+H]<sup>+</sup> Calcd. for [C<sub>21</sub>H<sub>13</sub>NO<sub>5</sub>]: 359.0794; Found: 359.0792.

## $^1\text{H}$ and $^{13}\text{C}$ NMR of compounds

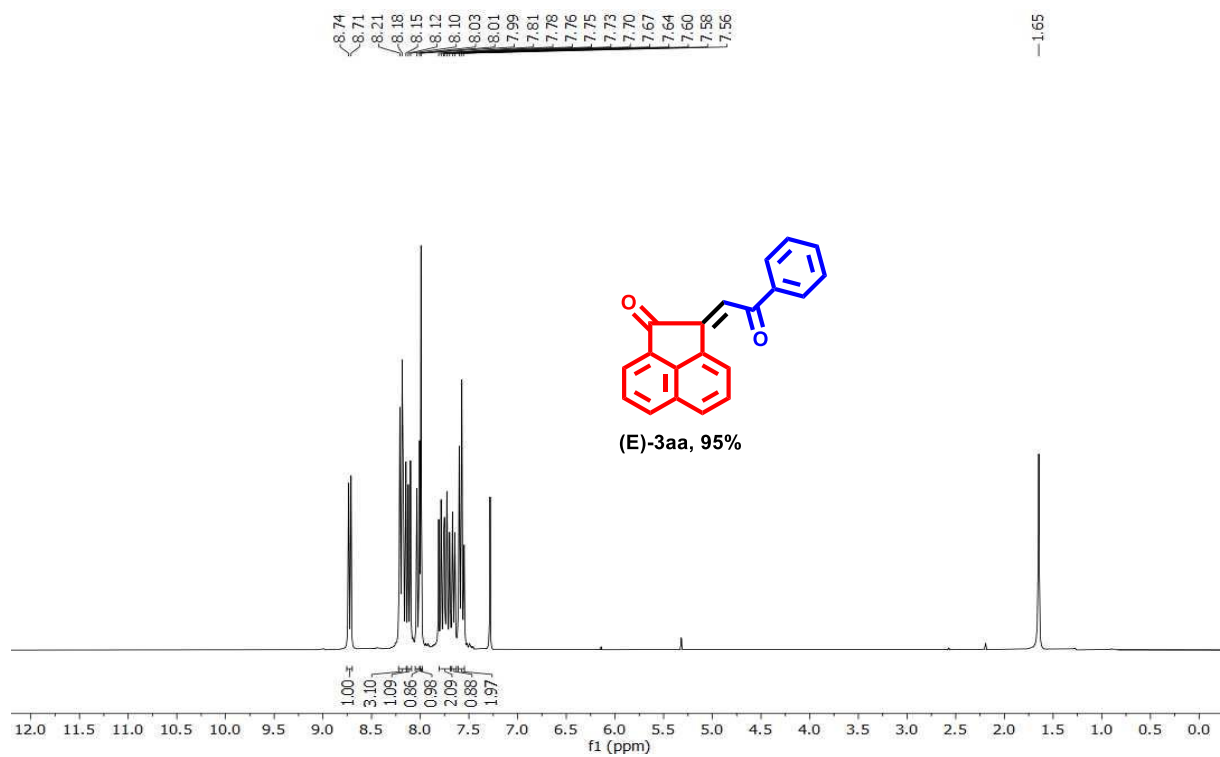

## $^1\text{H}$ NMR Spectrum of (E)-3aa

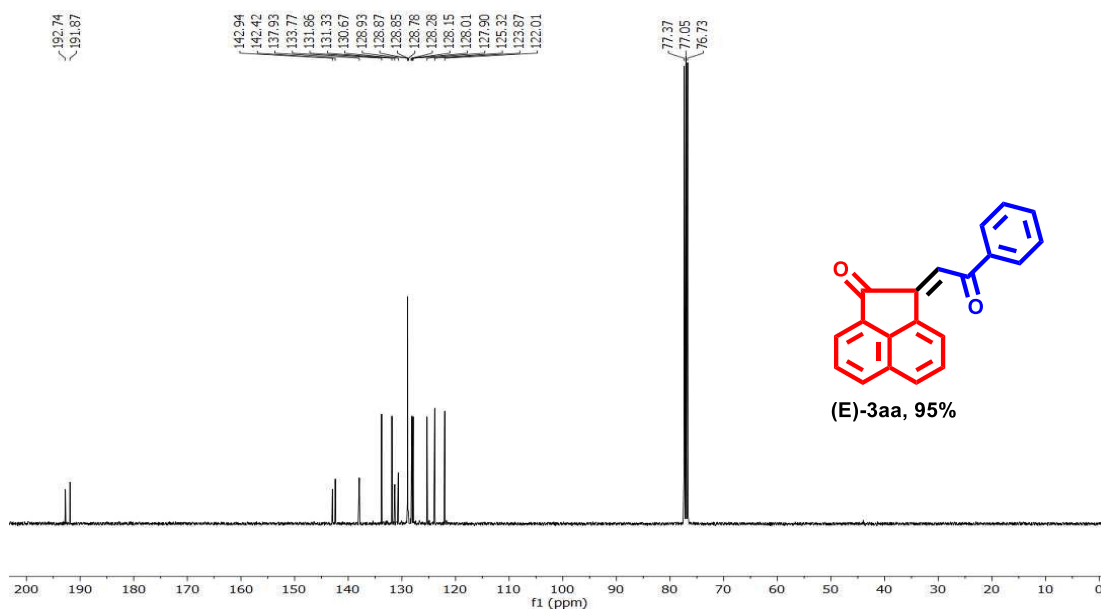

## $^{13}\text{C}$ NMR Spectrum of (E)-3aa

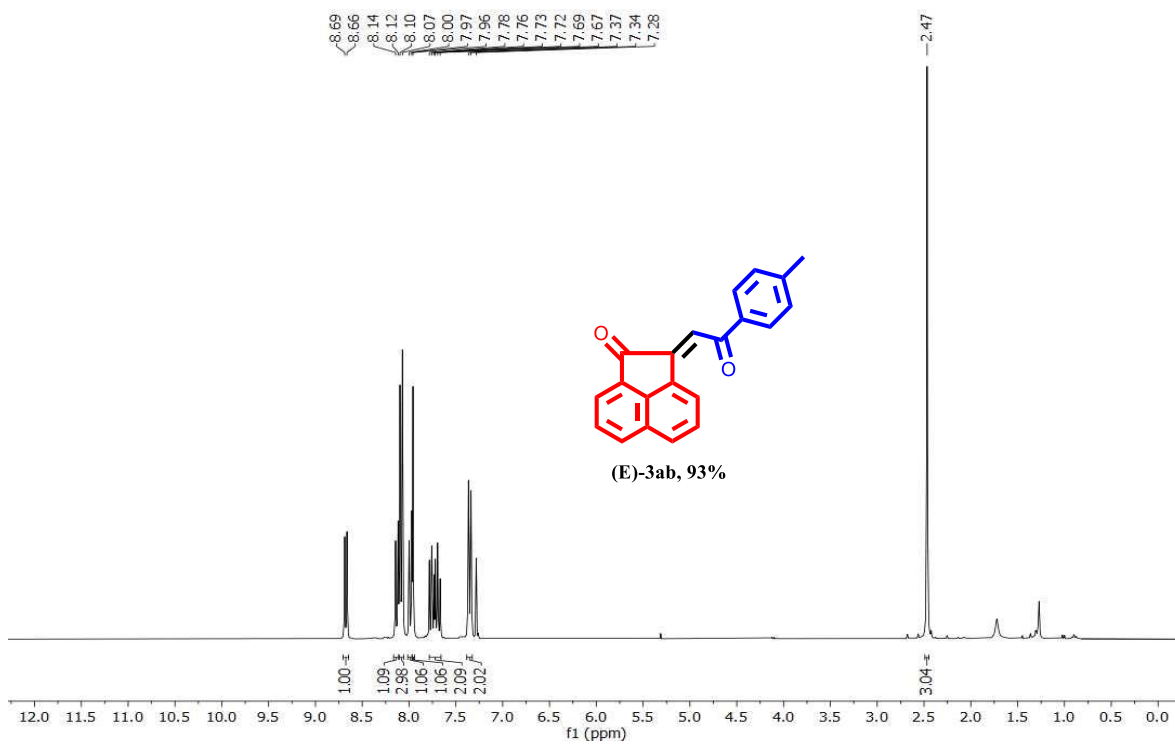

**<sup>1</sup>H NMR Spectrum of (E)-3ab**

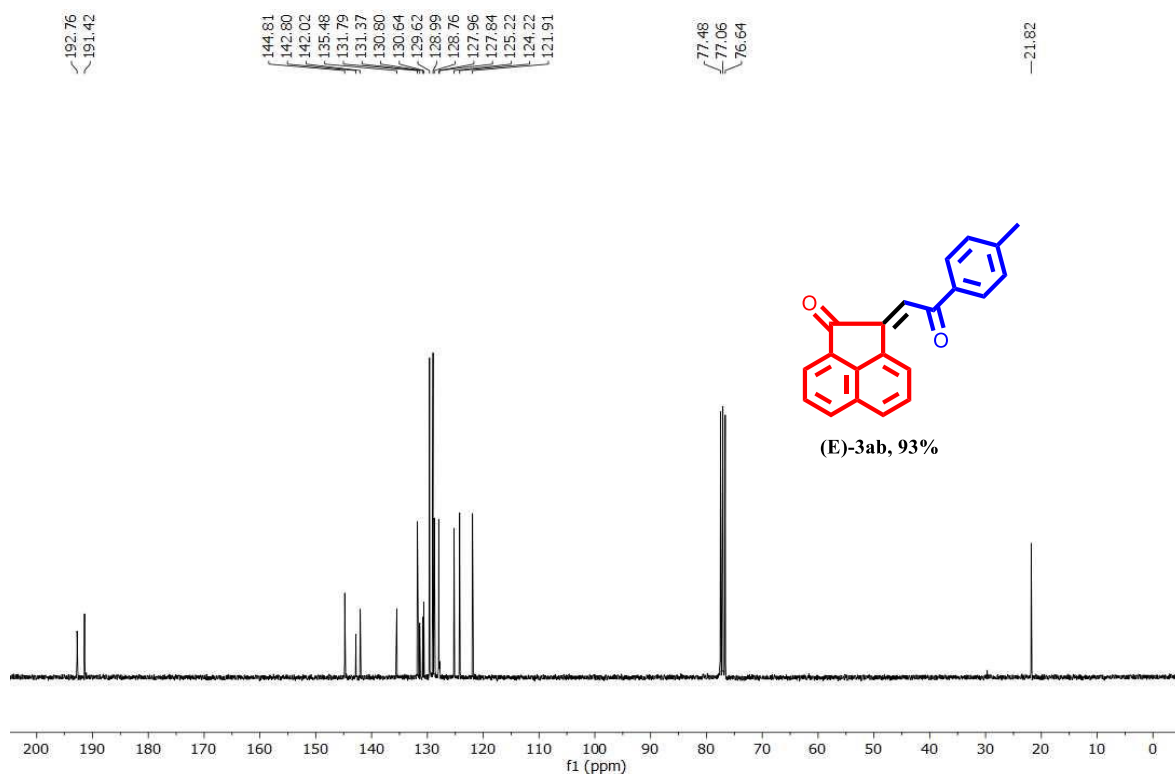

**<sup>13</sup>C NMR Spectrum of (E)-3ab**

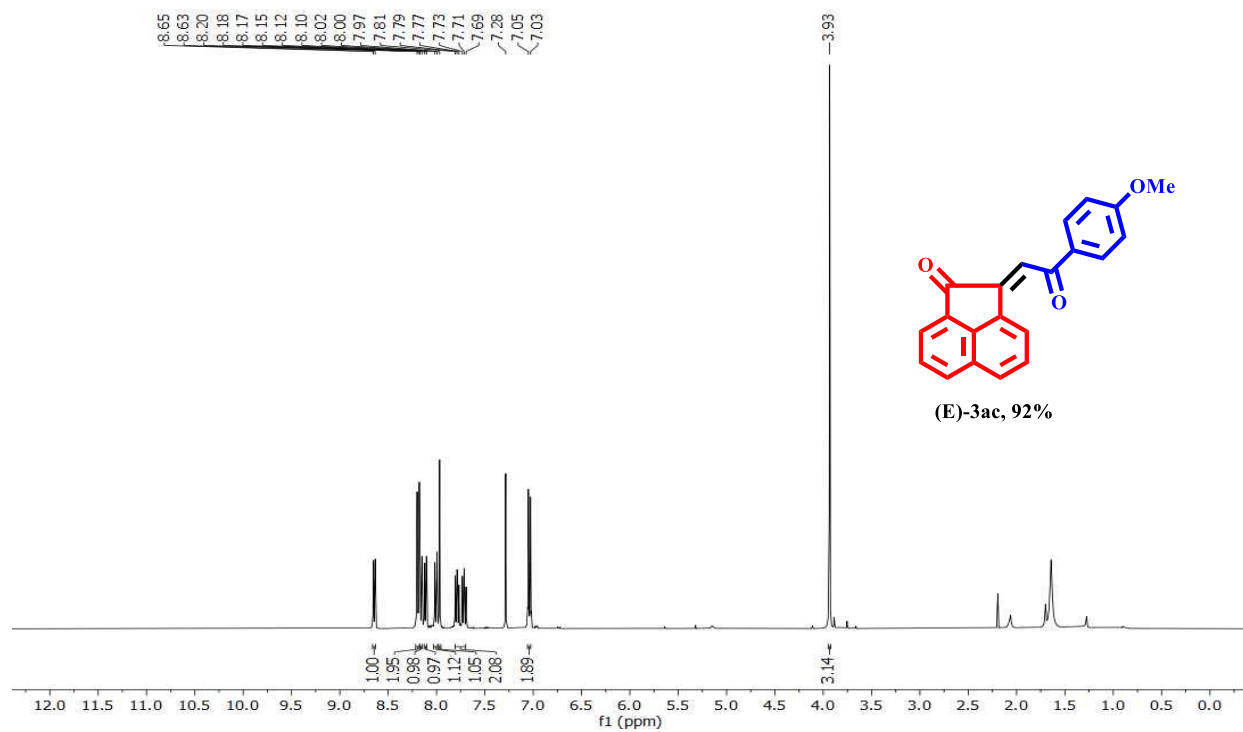

**<sup>1</sup>H NMR Spectrum of (E)-3ac**

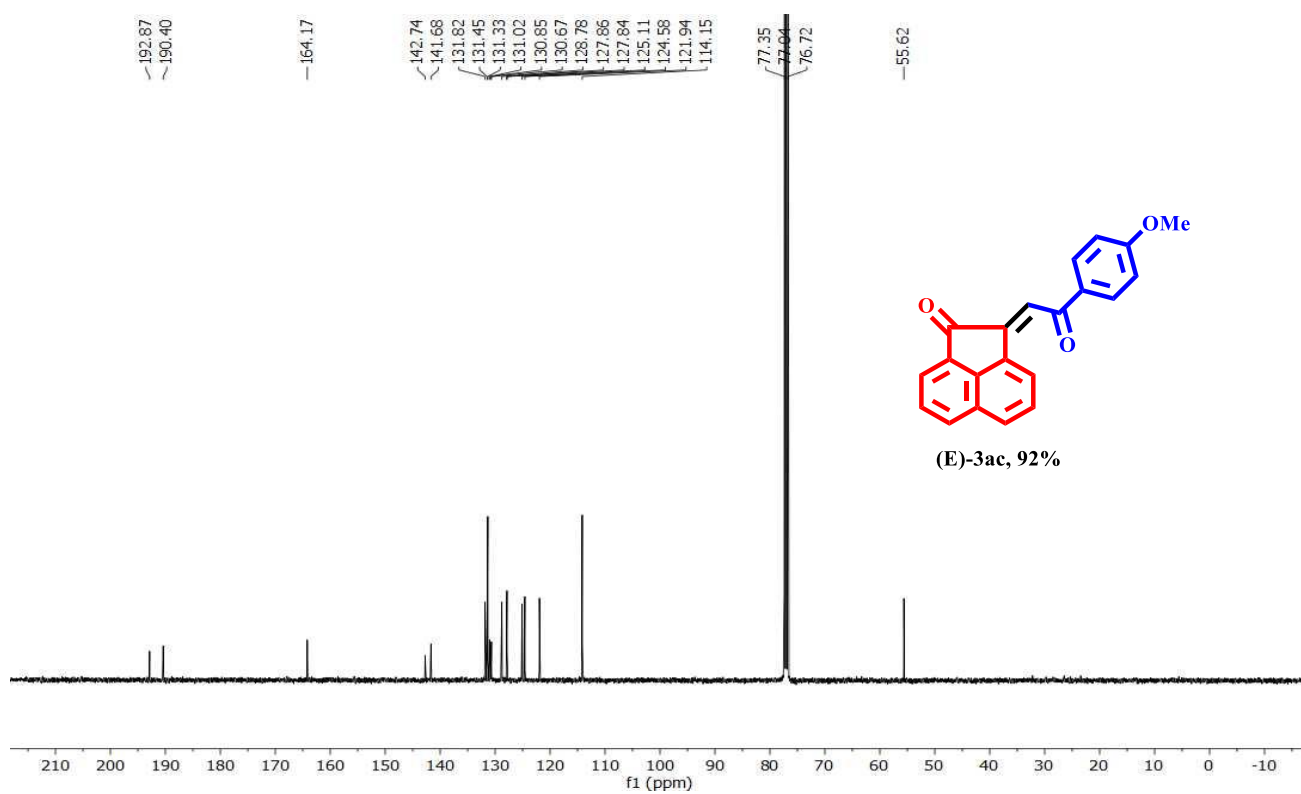

**<sup>13</sup>C NMR Spectrum of (E)-3ac**

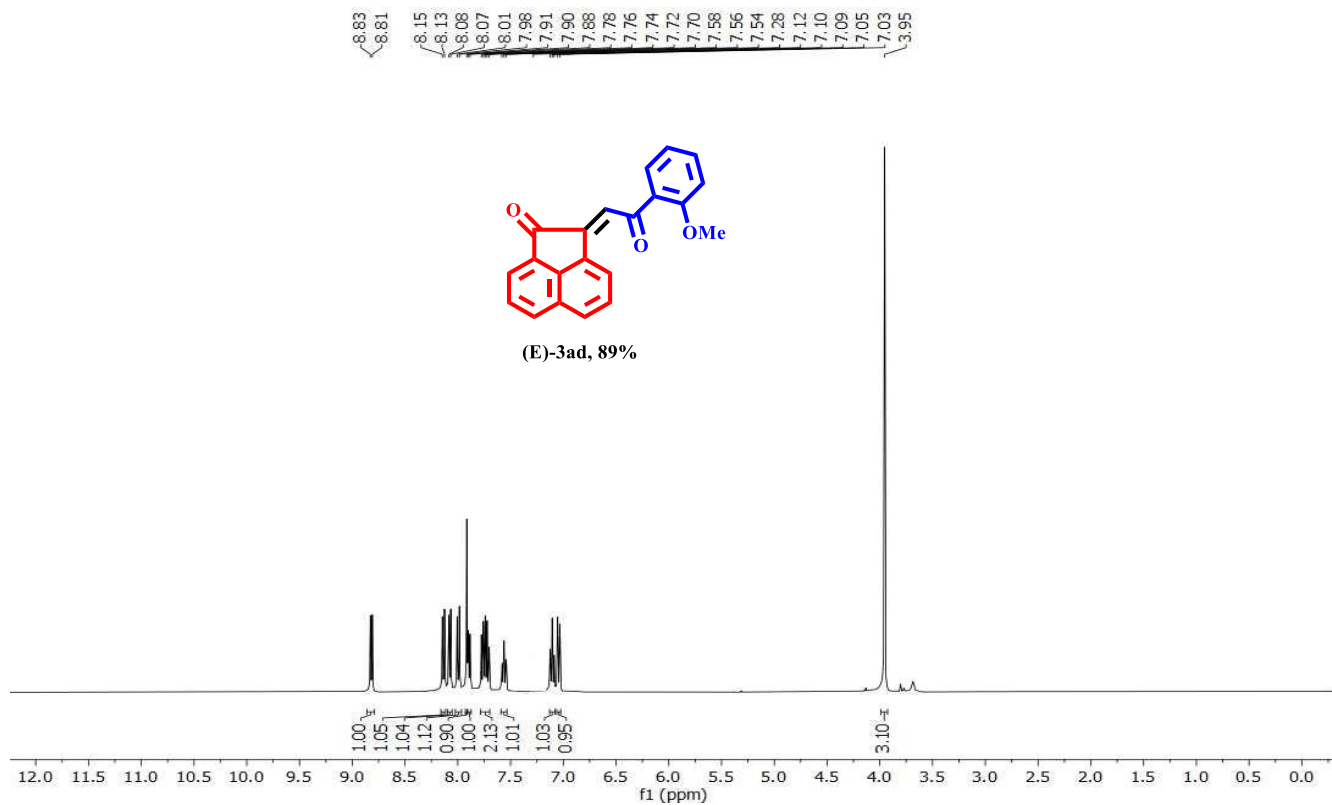

**<sup>1</sup>H NMR Spectrum of (E)-3ad**

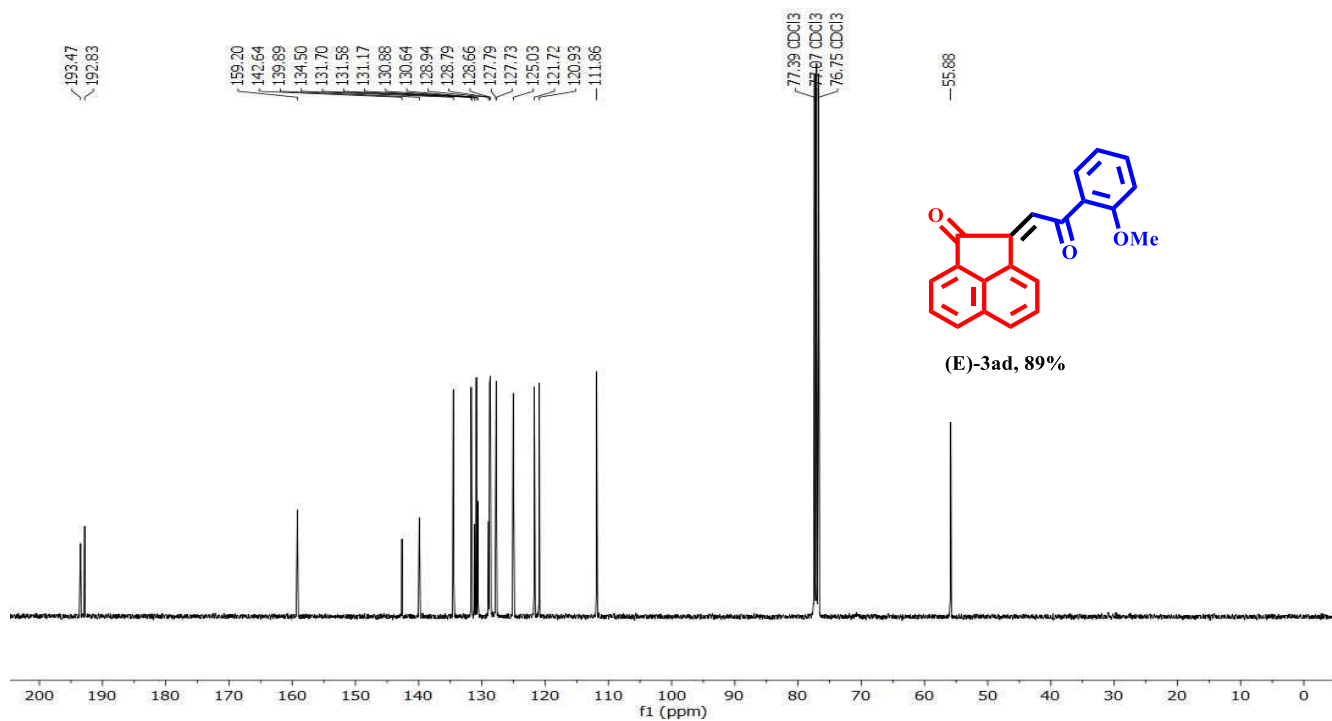

**<sup>13</sup>C NMR Spectrum of (E)-3ad**

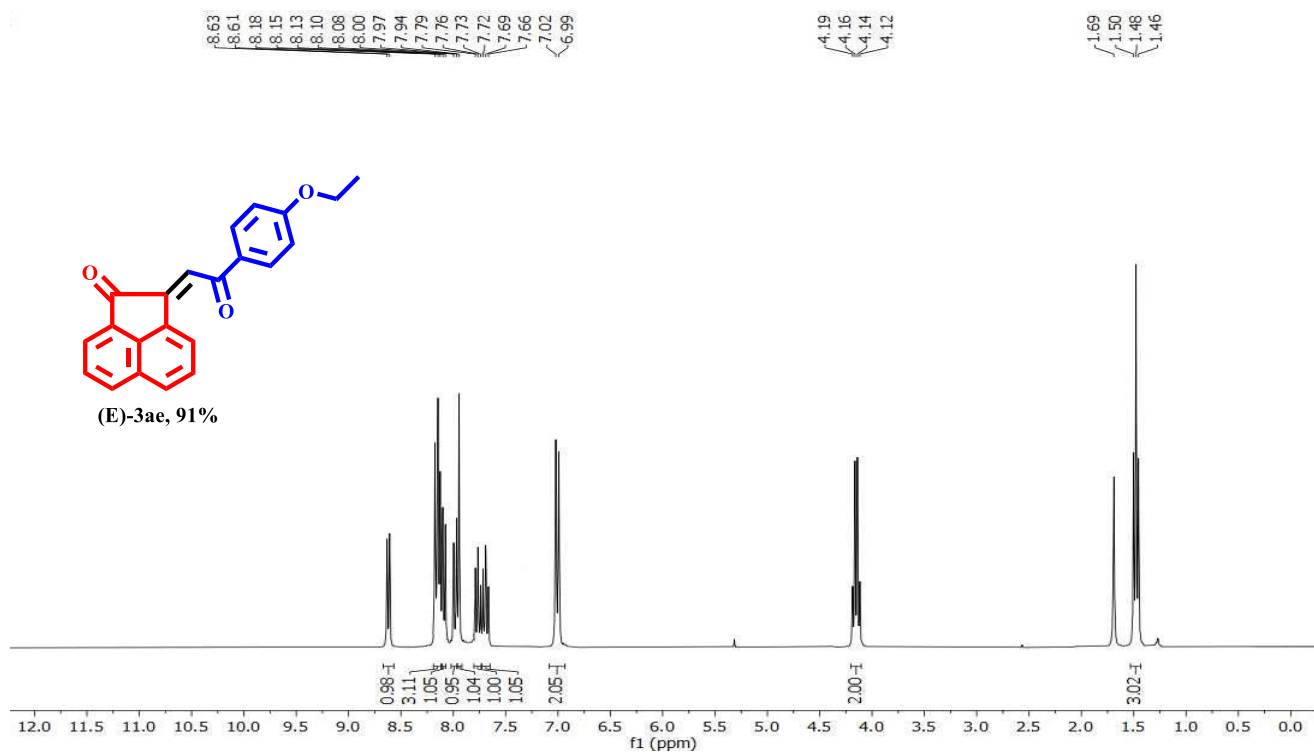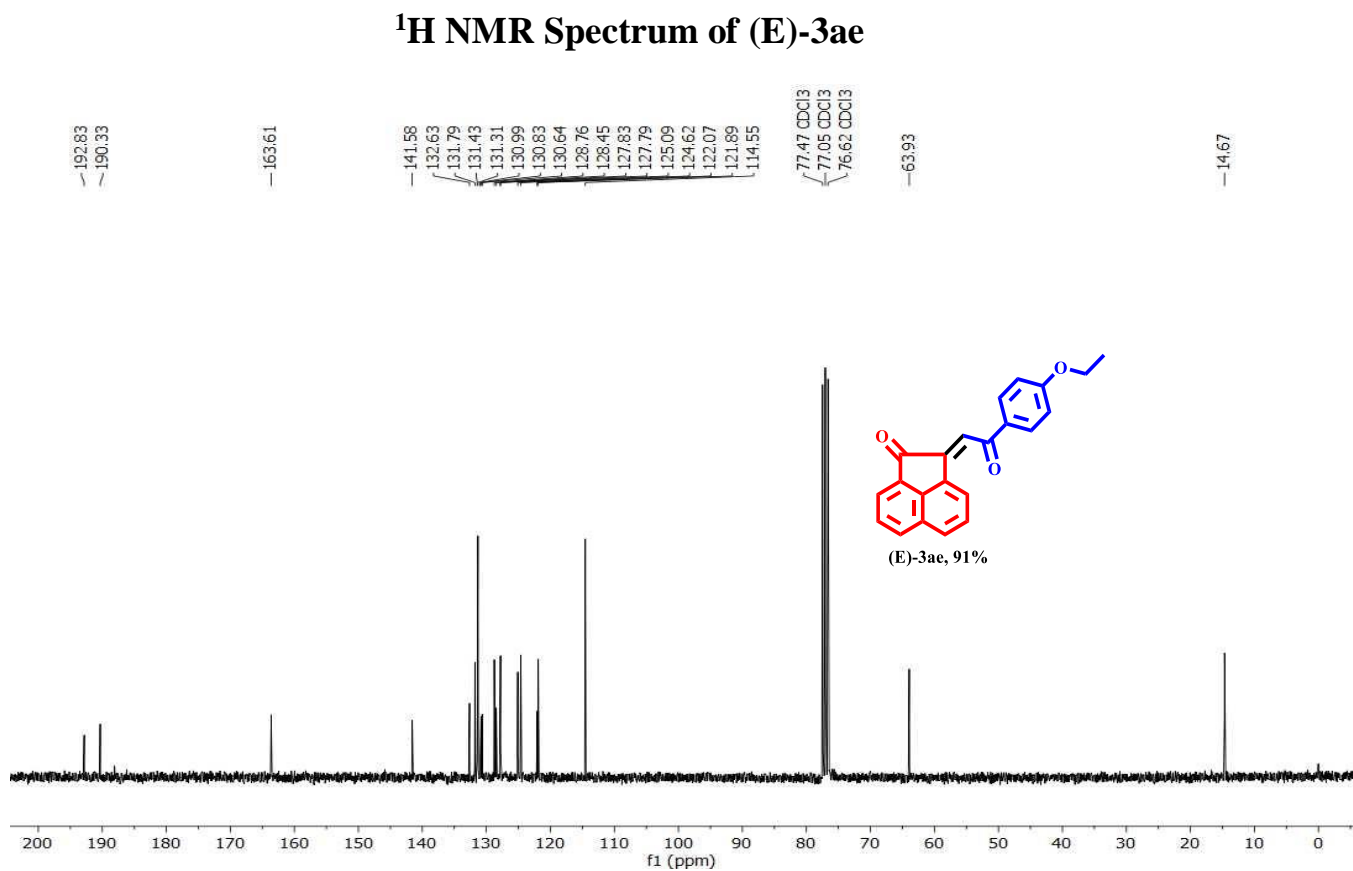

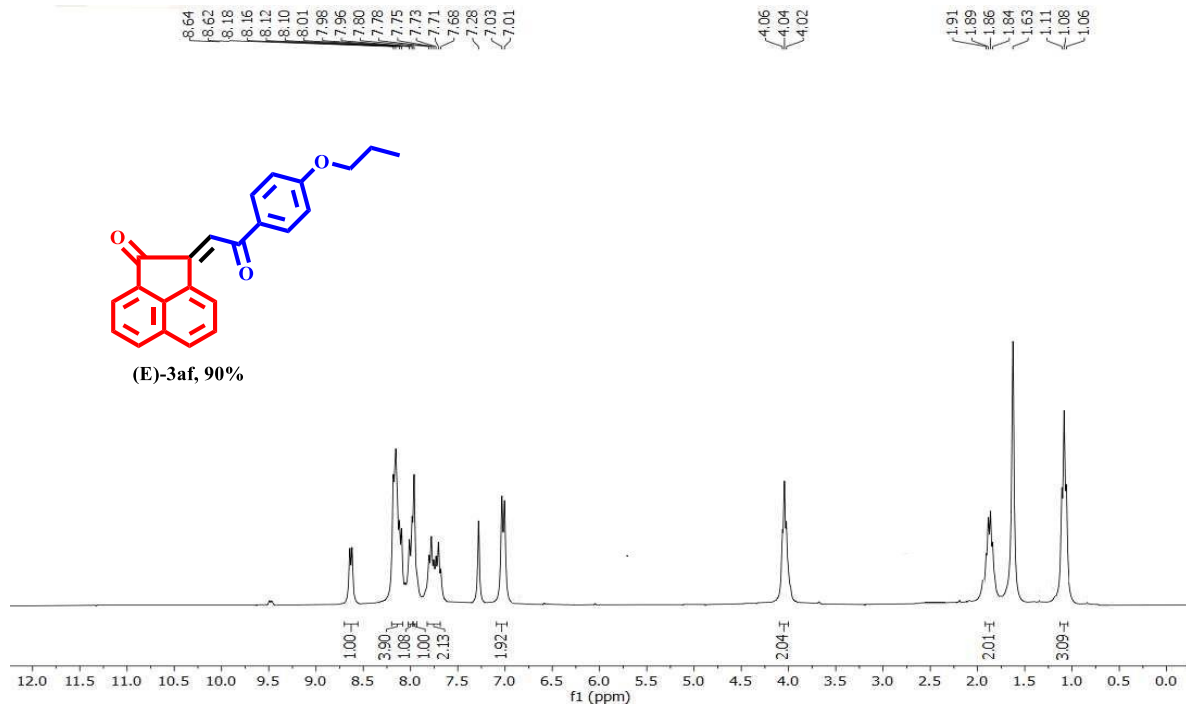

**<sup>1</sup>H NMR Spectrum of (E)-3af**

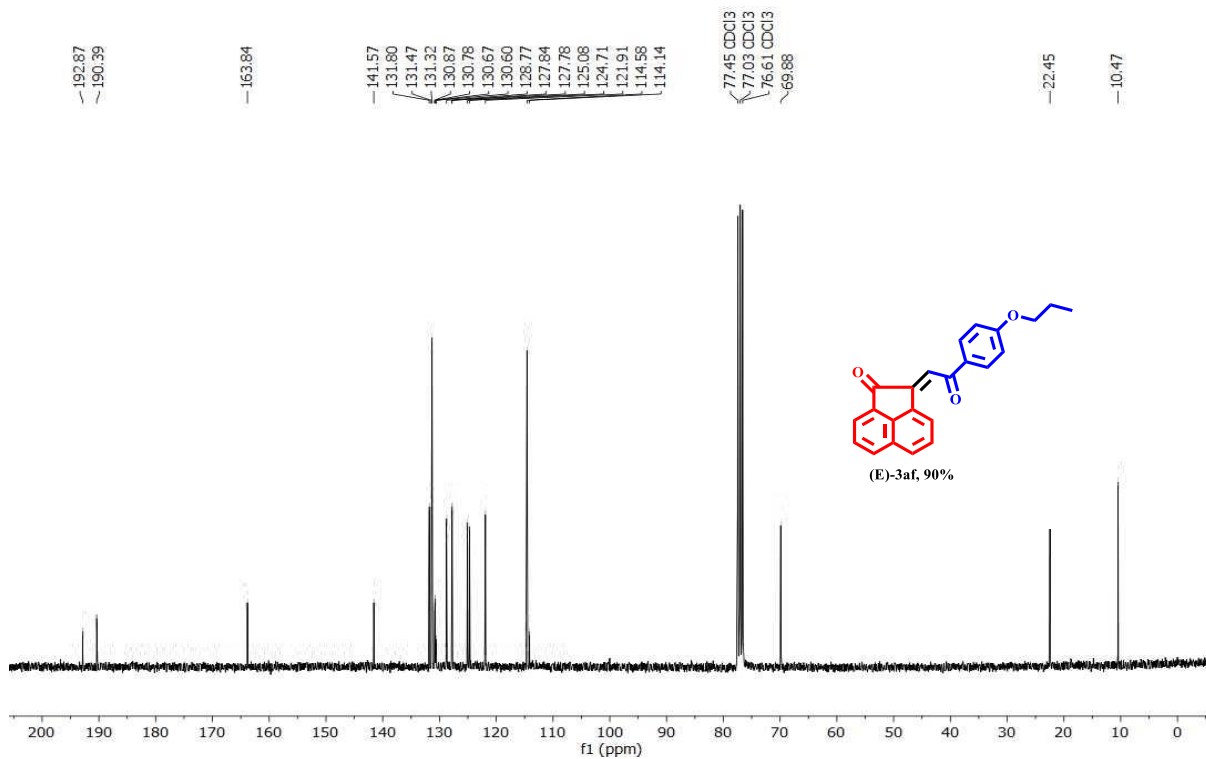

**<sup>13</sup>C NMR Spectrum of (E)-3af**



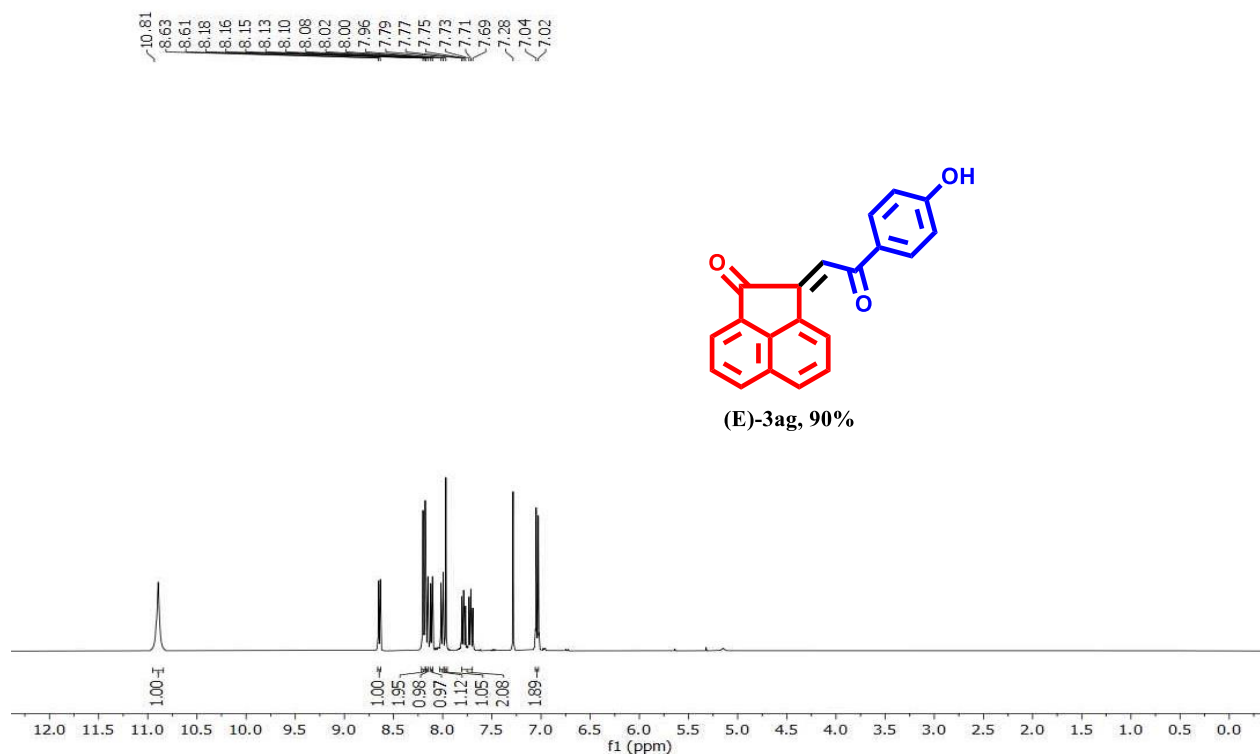

**<sup>1</sup>H NMR Spectrum of (E)-3ag**

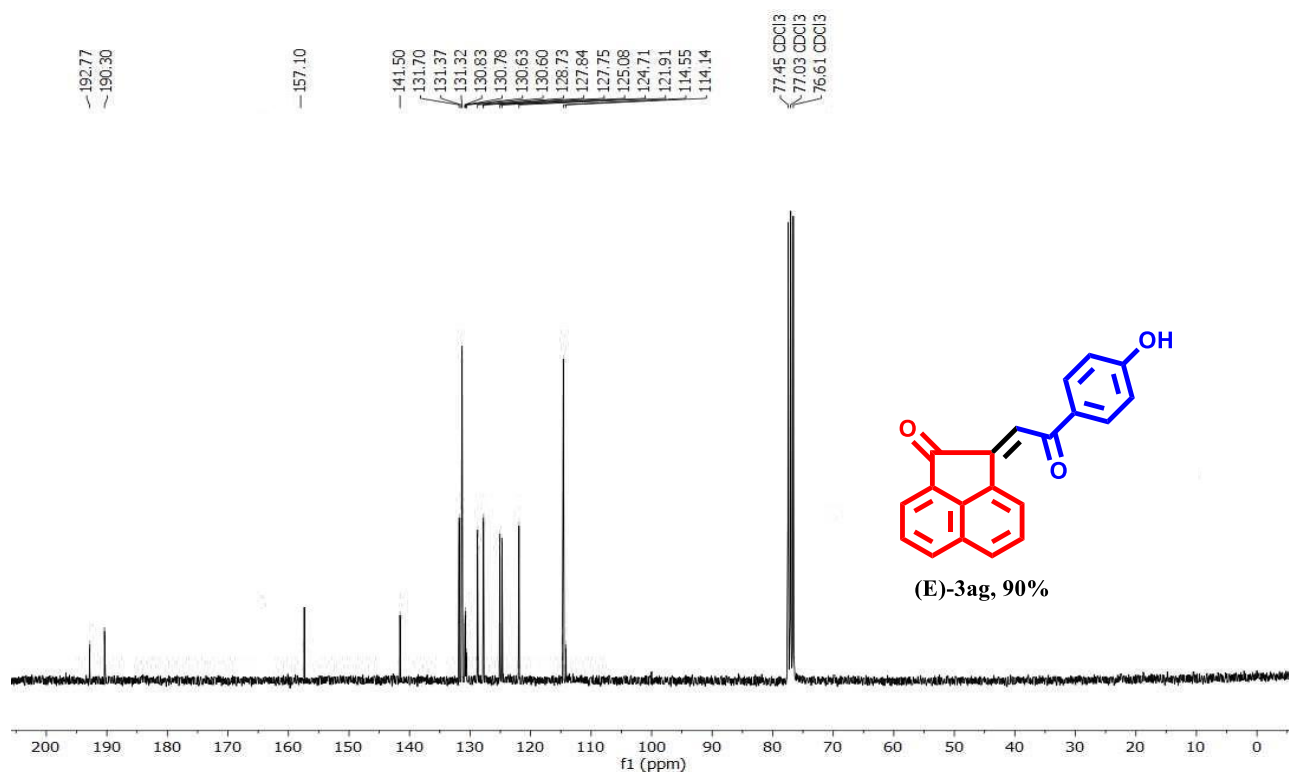

**<sup>13</sup>C NMR Spectrum of (E)-3ag**

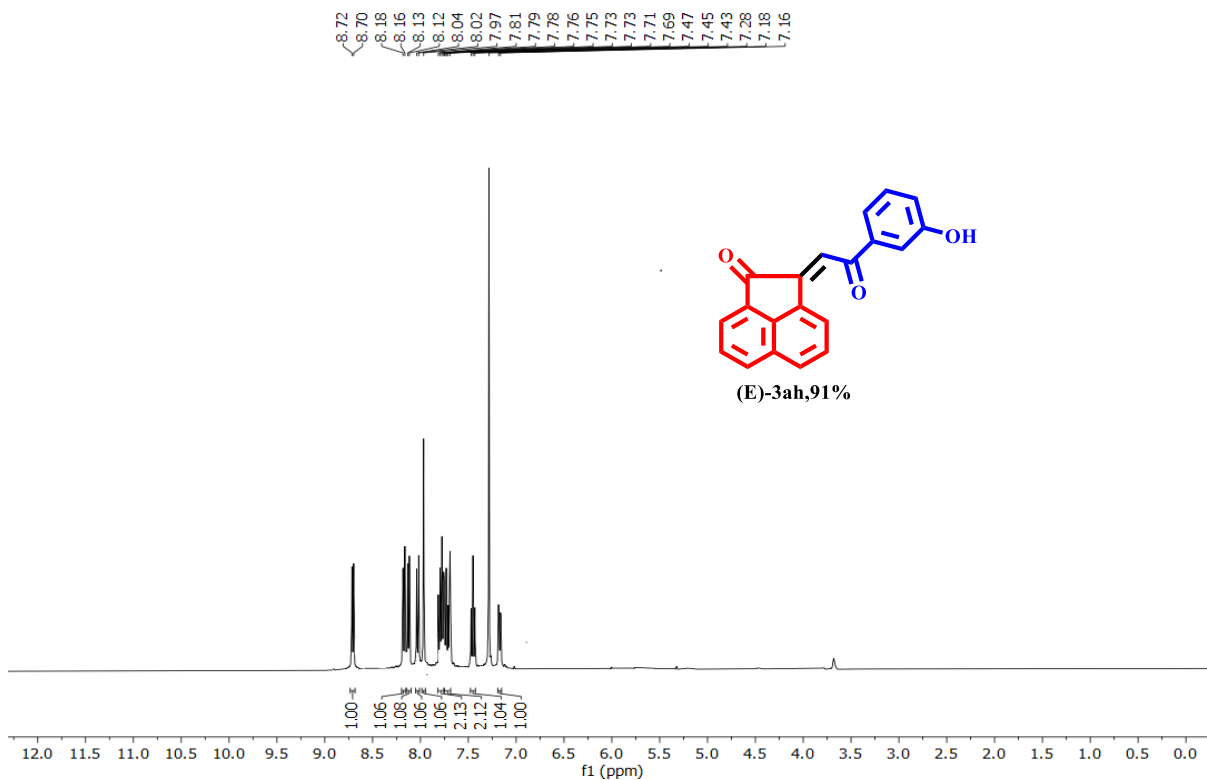

**<sup>1</sup>H NMR Spectrum of (E)-3ah**

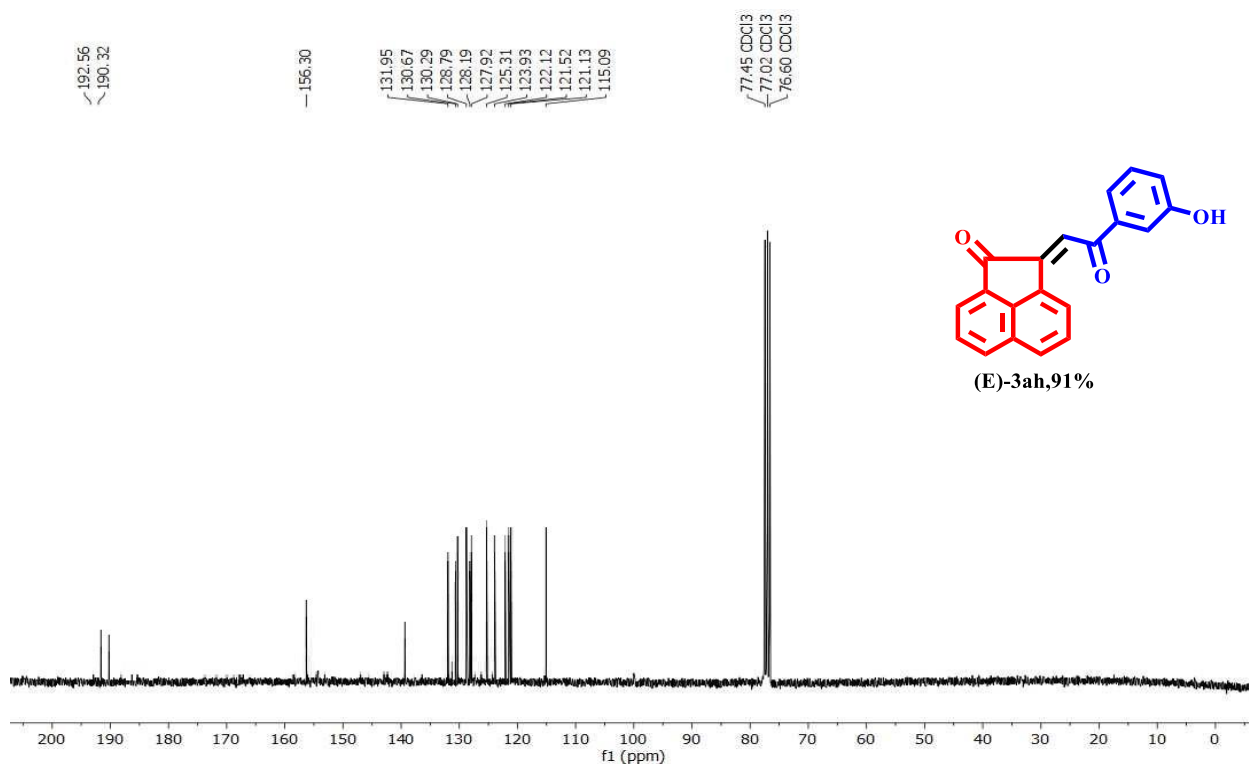

**<sup>13</sup>C NMR Spectrum of (E)-3ah**

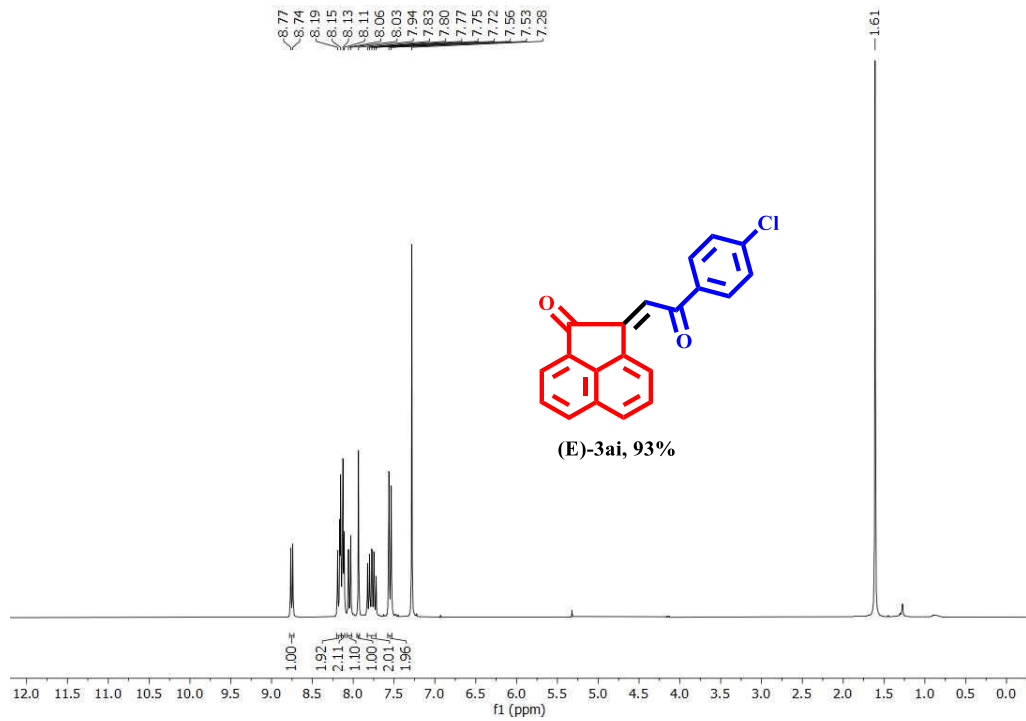

**<sup>1</sup>H NMR Spectrum of (E)-3ai**

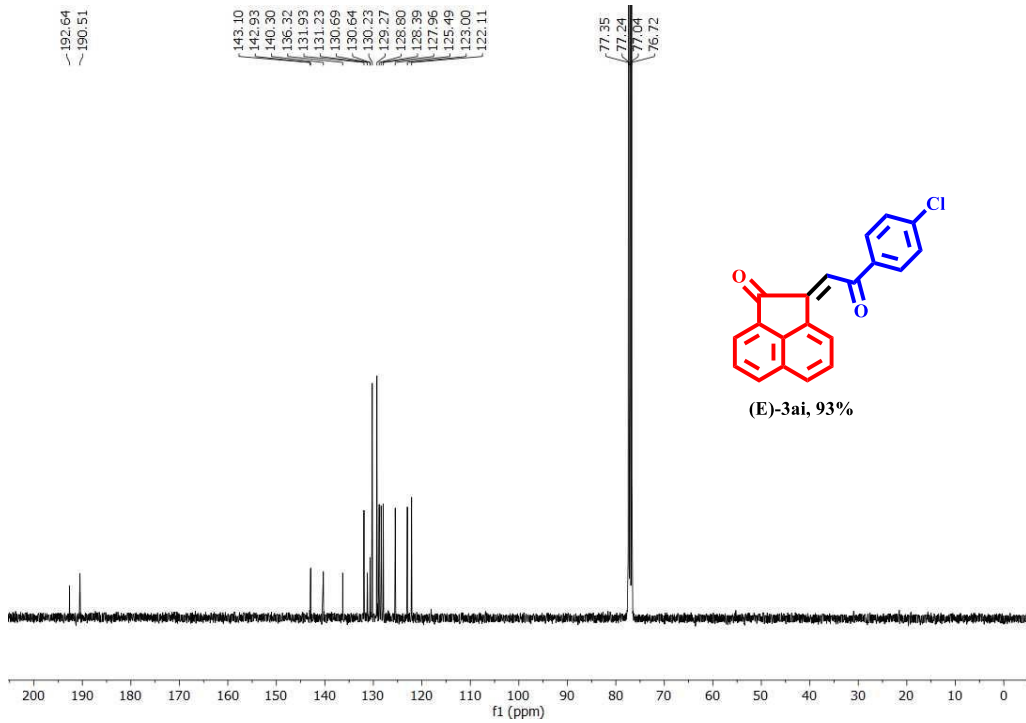

**<sup>13</sup>C NMR Spectrum of (E)-3ai**

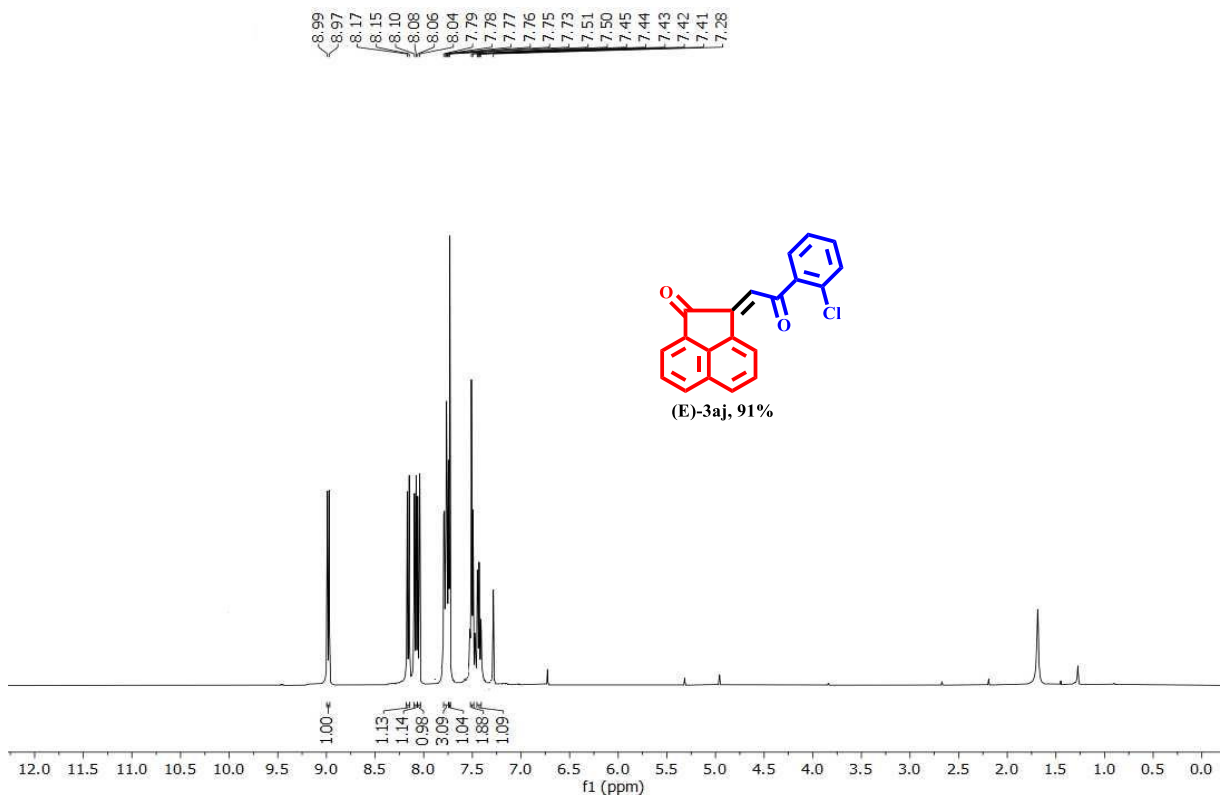

**<sup>1</sup>H NMR Spectrum of (E)-3aj**

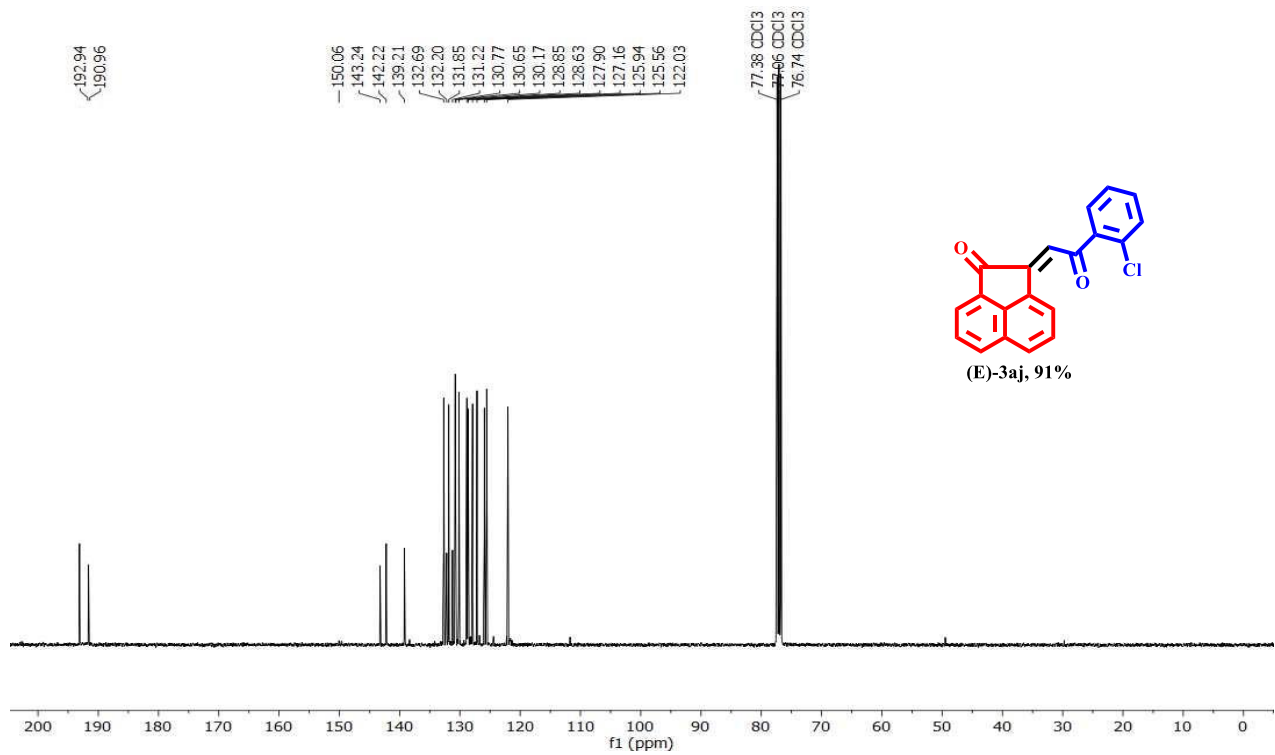

**<sup>13</sup>C NMR Spectrum of (E)-3aj**

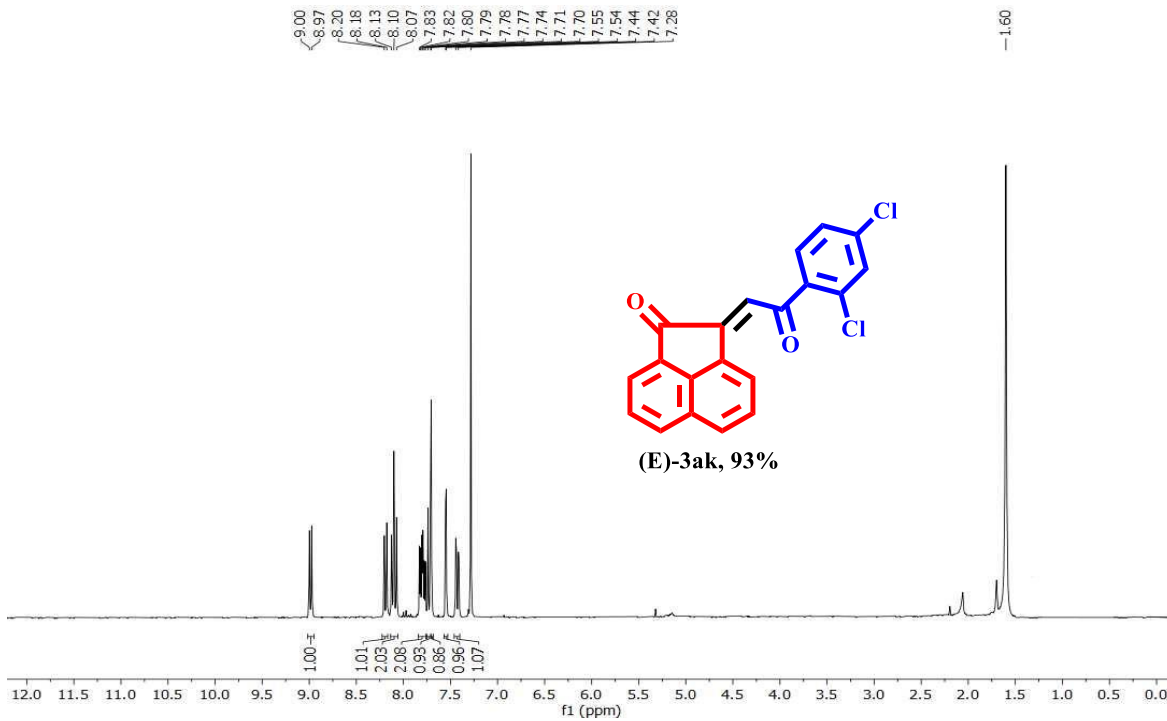

**<sup>1</sup>H NMR Spectrum of (E)-3ak**

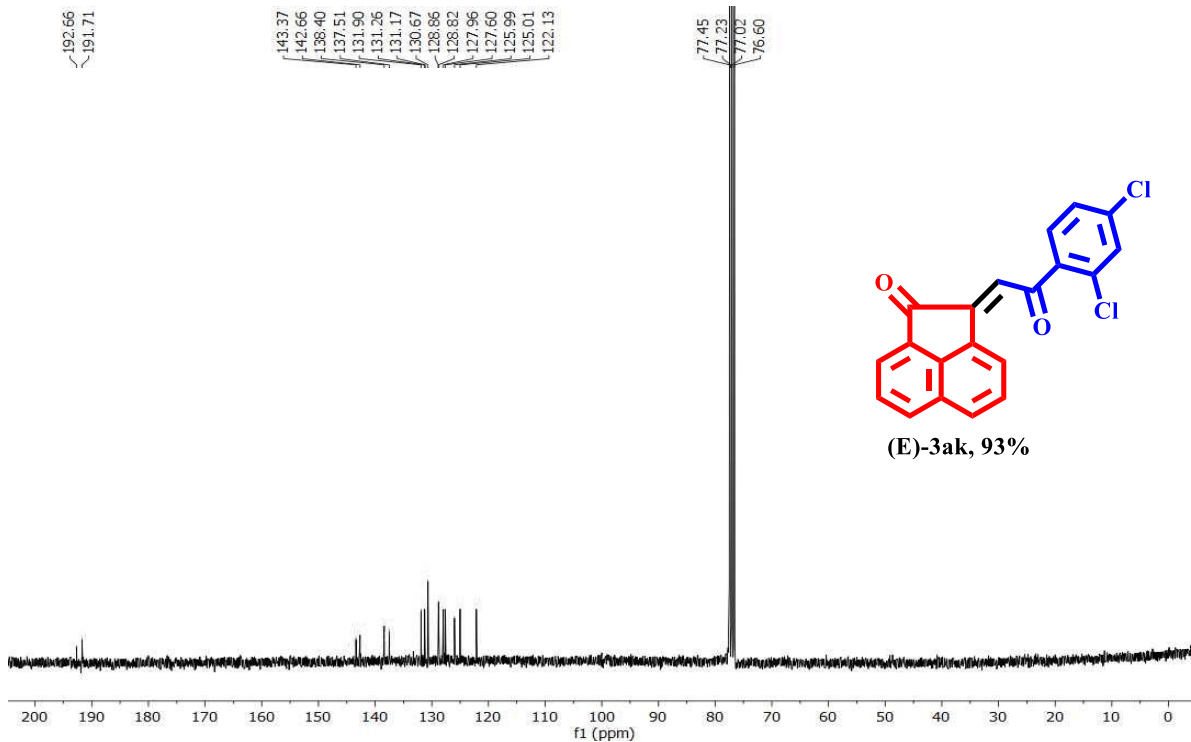

**<sup>13</sup>C NMR Spectrum of (E)-3ak**

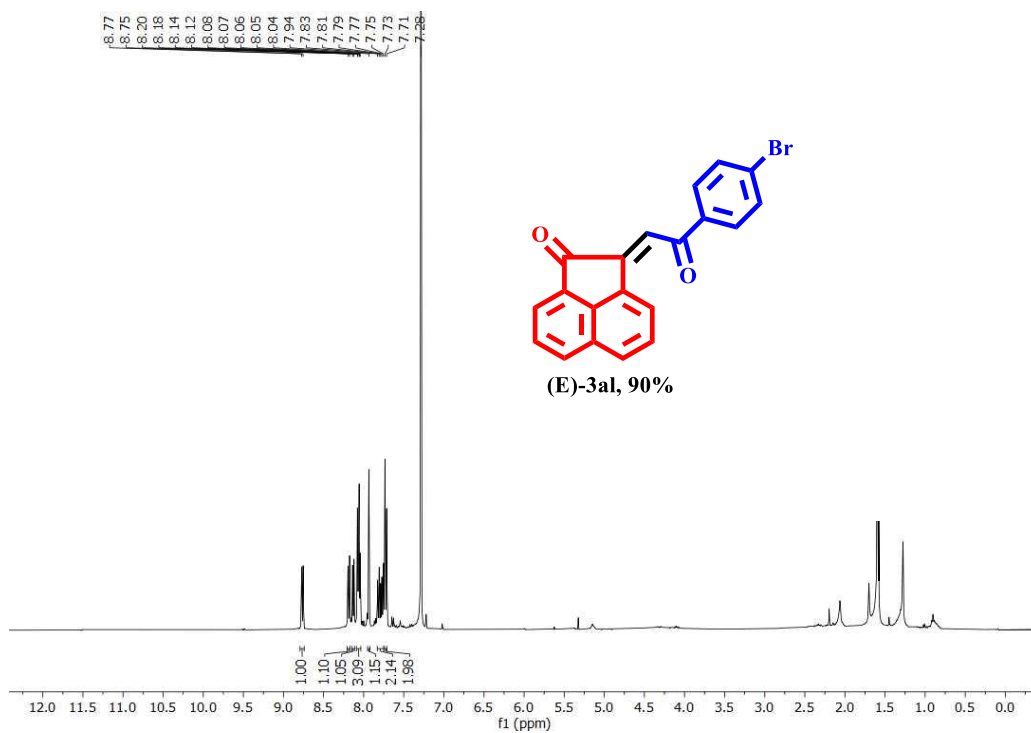

**<sup>1</sup>H NMR Spectrum of (E)-3al**

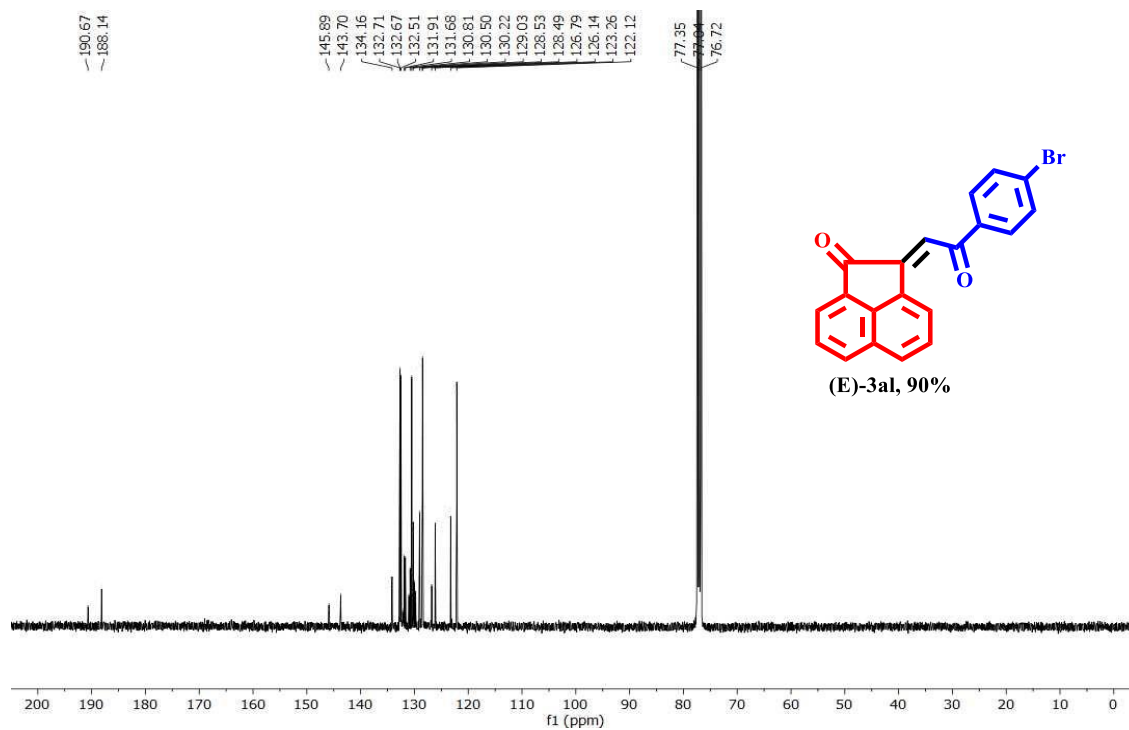

**<sup>13</sup>C NMR Spectrum of (E)-3al**

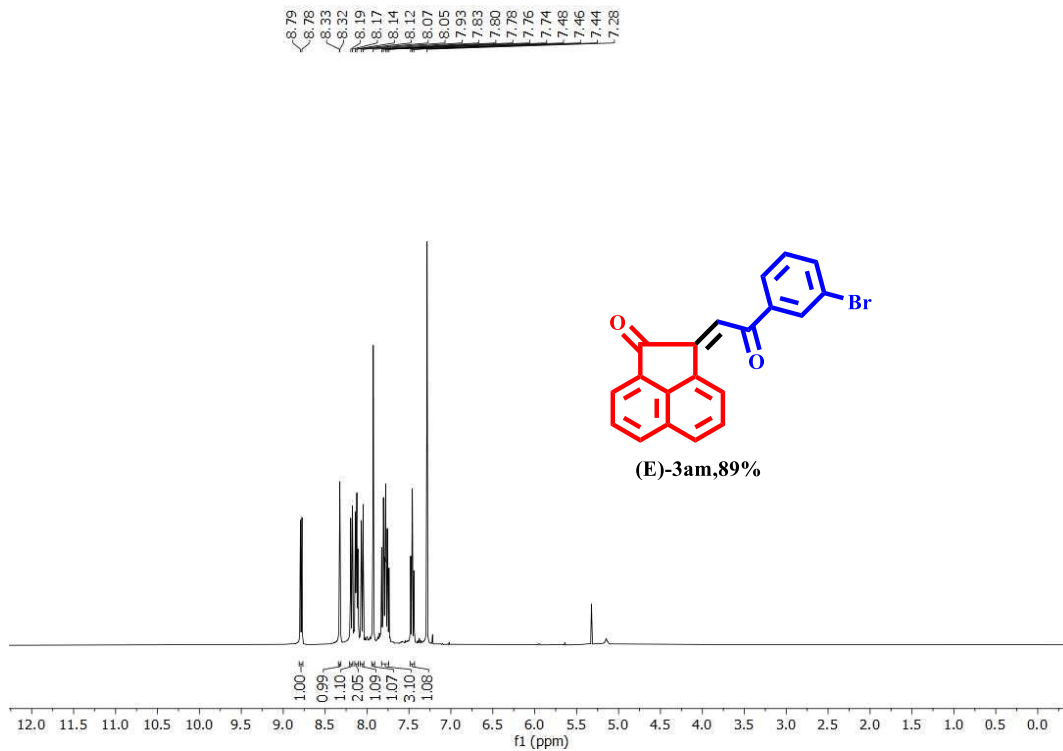

**<sup>1</sup>H NMR Spectrum of (E)-3am**

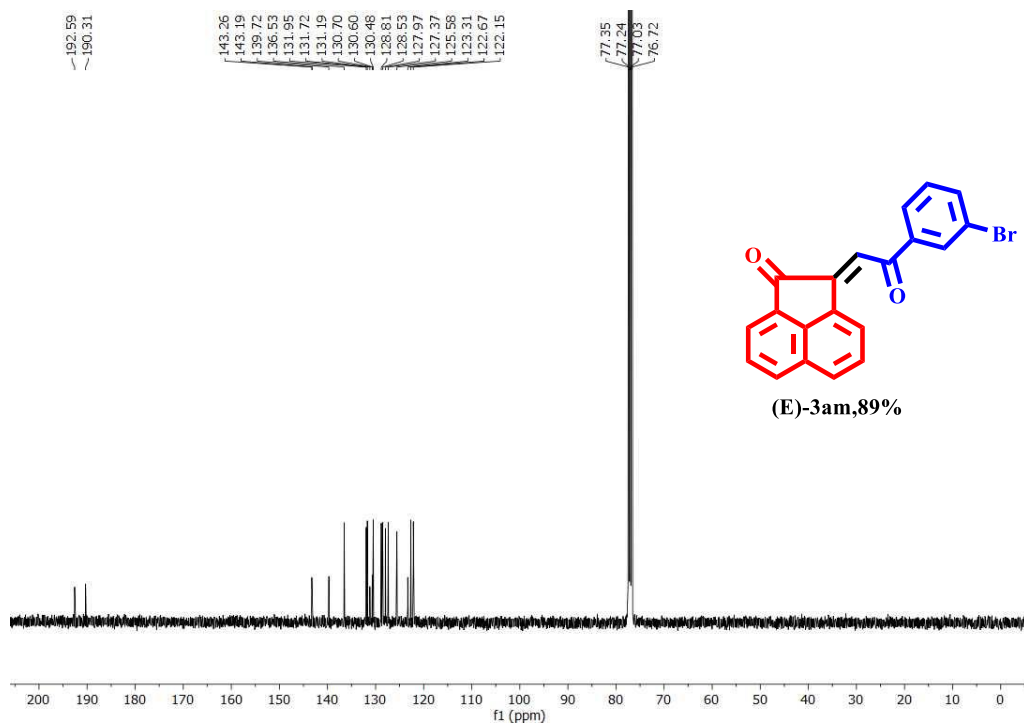

**<sup>13</sup>C NMR Spectrum of (E)-3am**

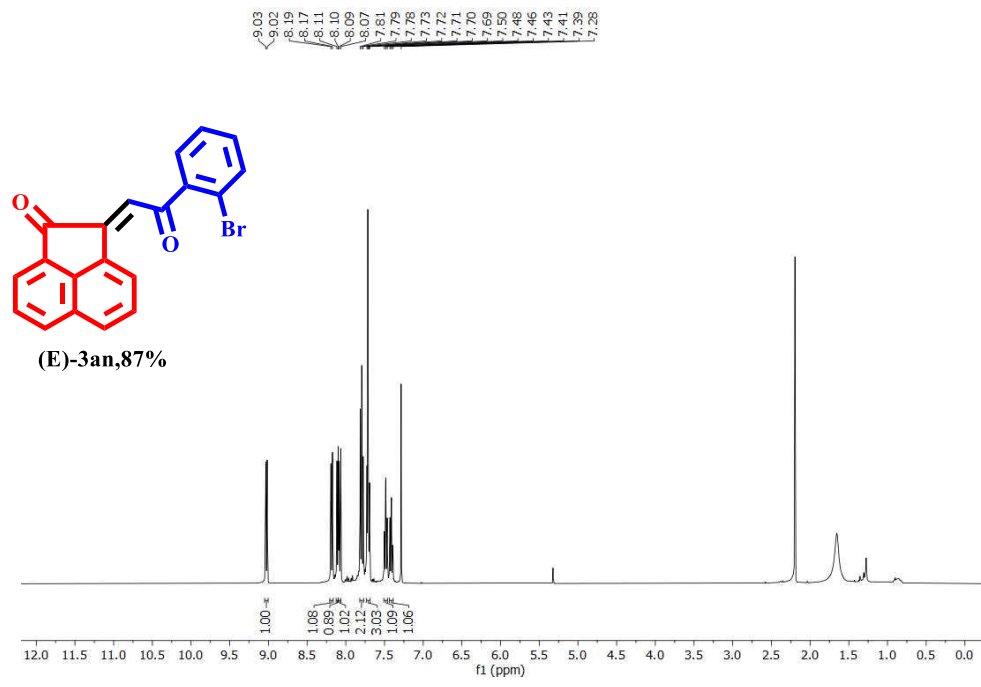

**<sup>1</sup>H NMR Spectrum of (E)-3an**

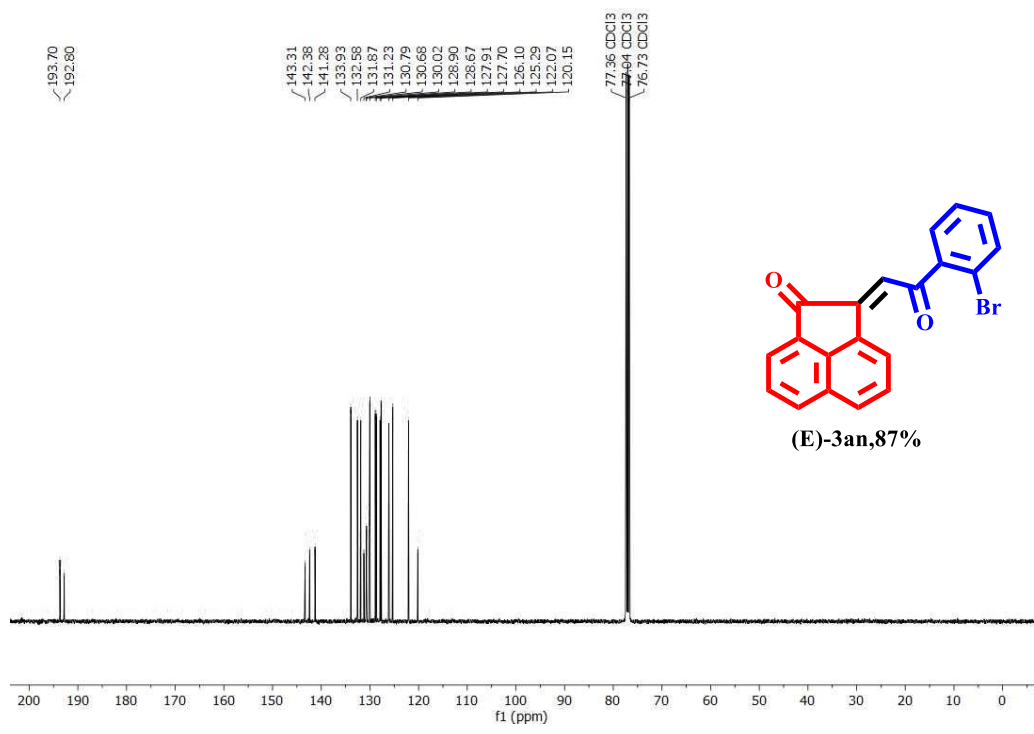

**<sup>13</sup>C NMR Spectrum of (E)-3an**



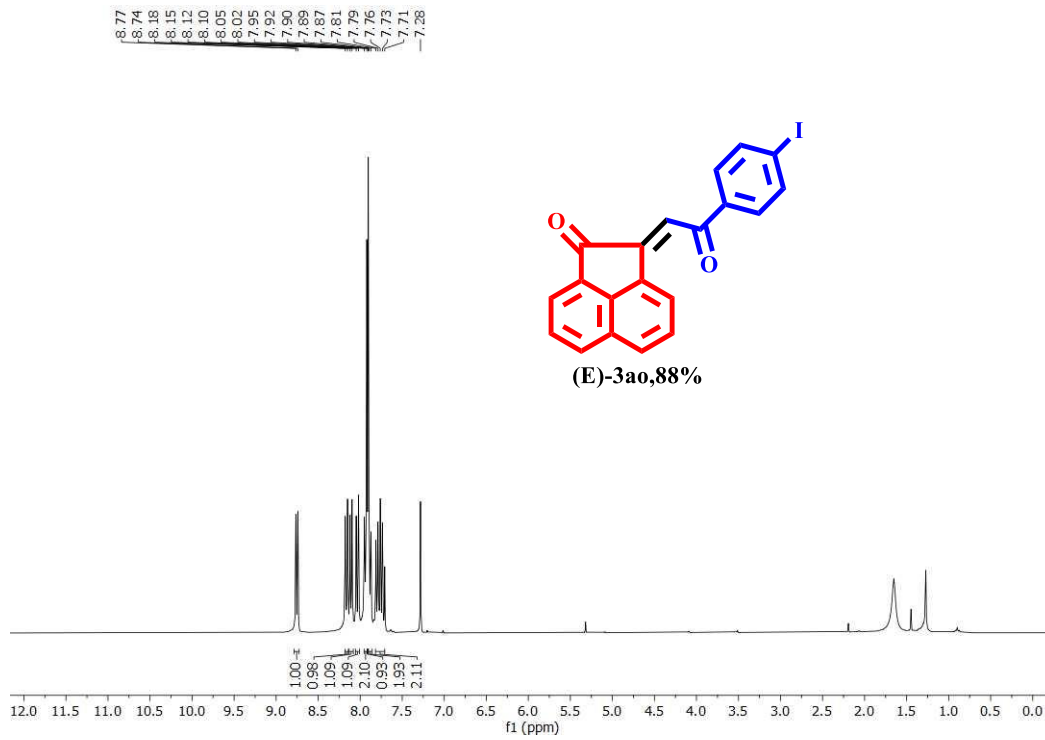

**<sup>1</sup>H NMR Spectrum of (E)-3ao**

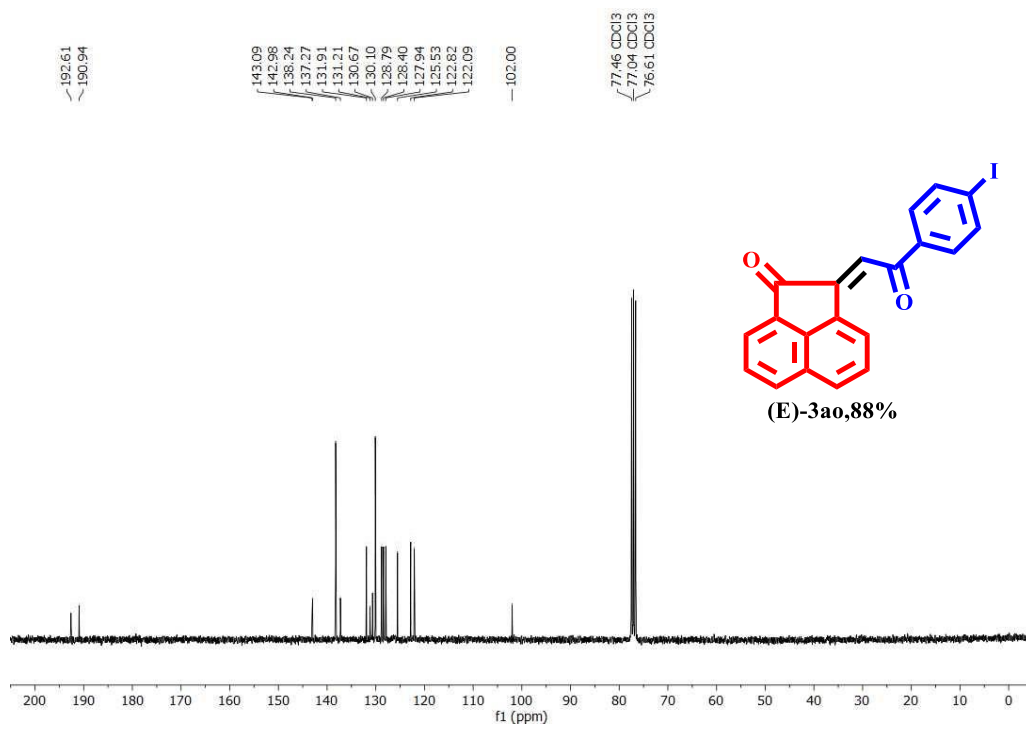

**<sup>13</sup>C NMR Spectrum of (E)-3ao**

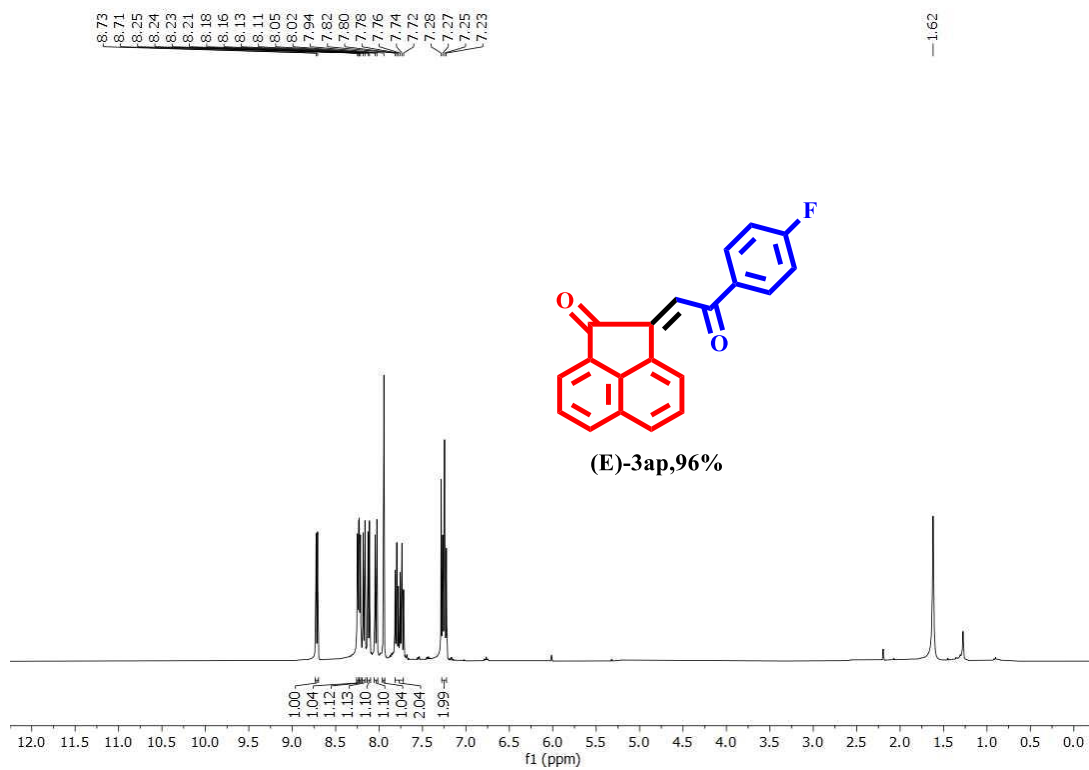

**<sup>1</sup>H NMR Spectrum of (E)-3ap**

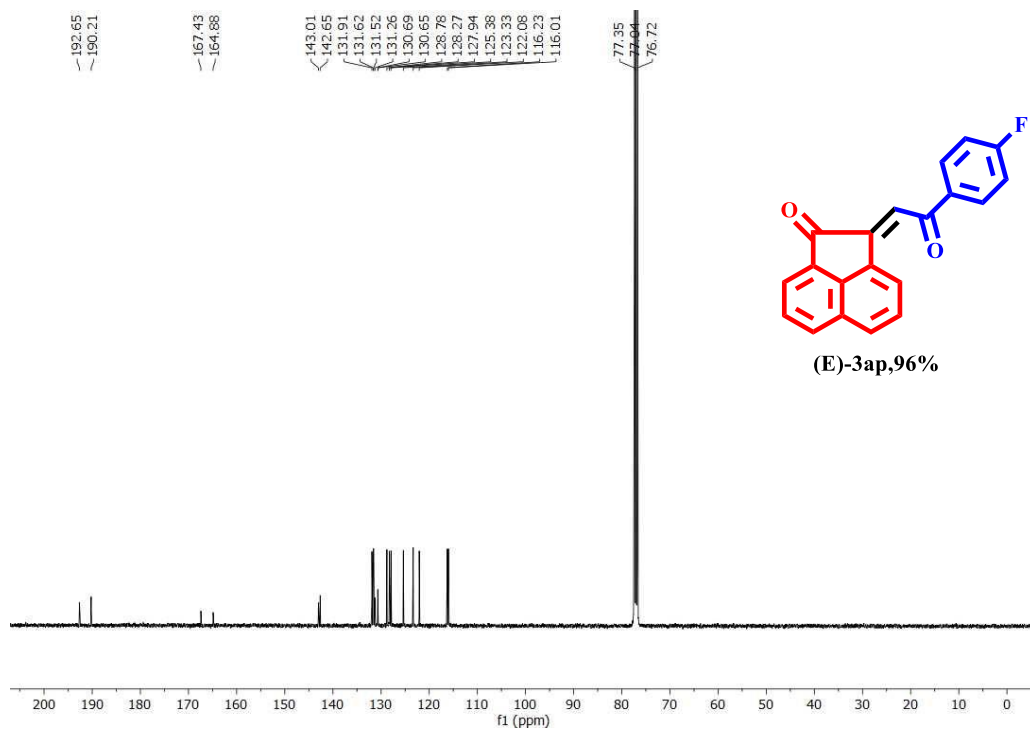

**<sup>13</sup>C NMR Spectrum of (E)-3ap**

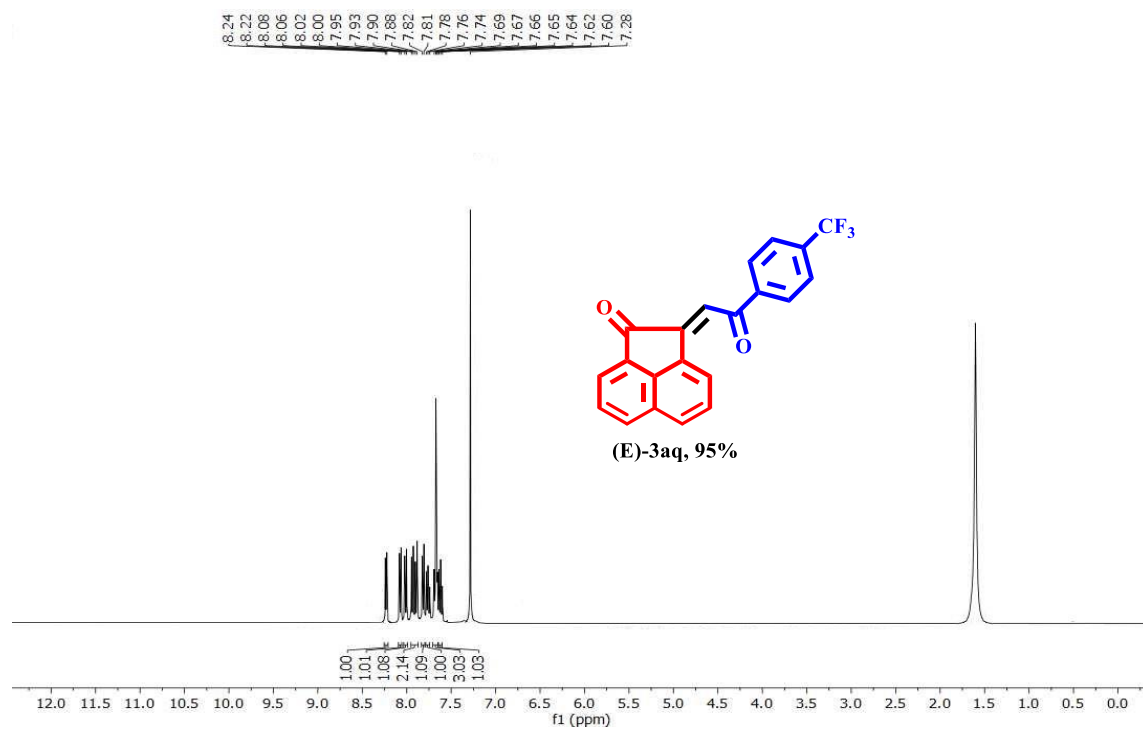

**<sup>1</sup>H NMR Spectrum of (E)-3aq**

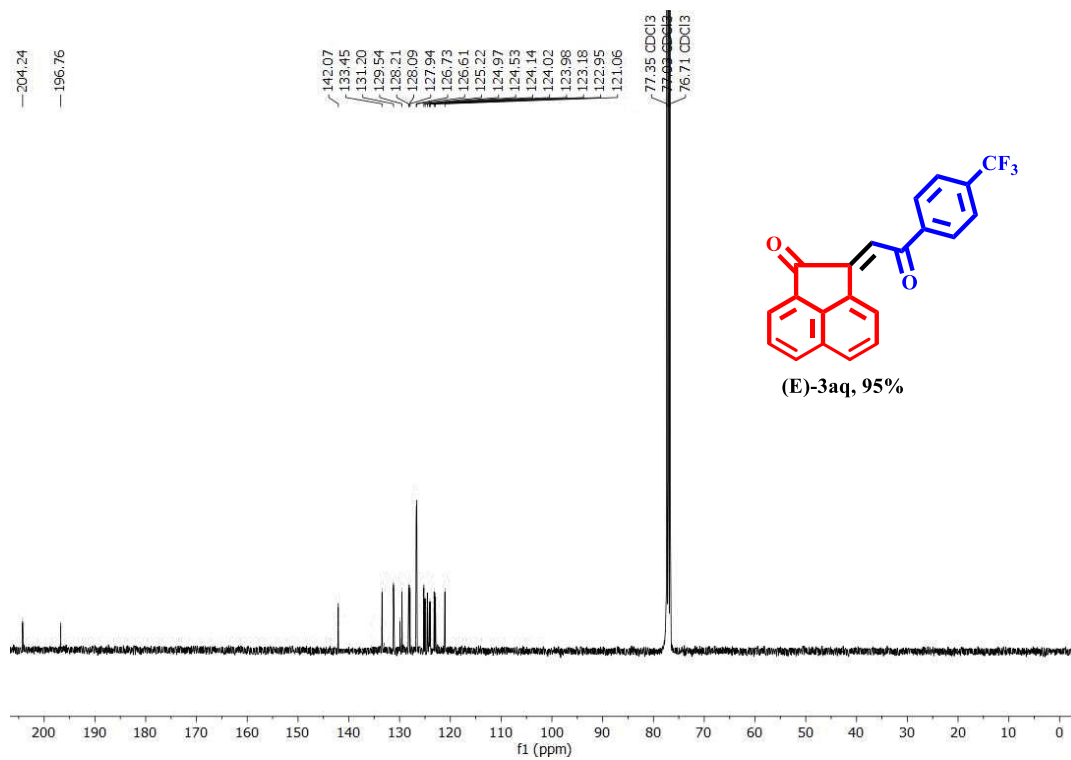

**<sup>13</sup>C NMR Spectrum of (E)-3aq**

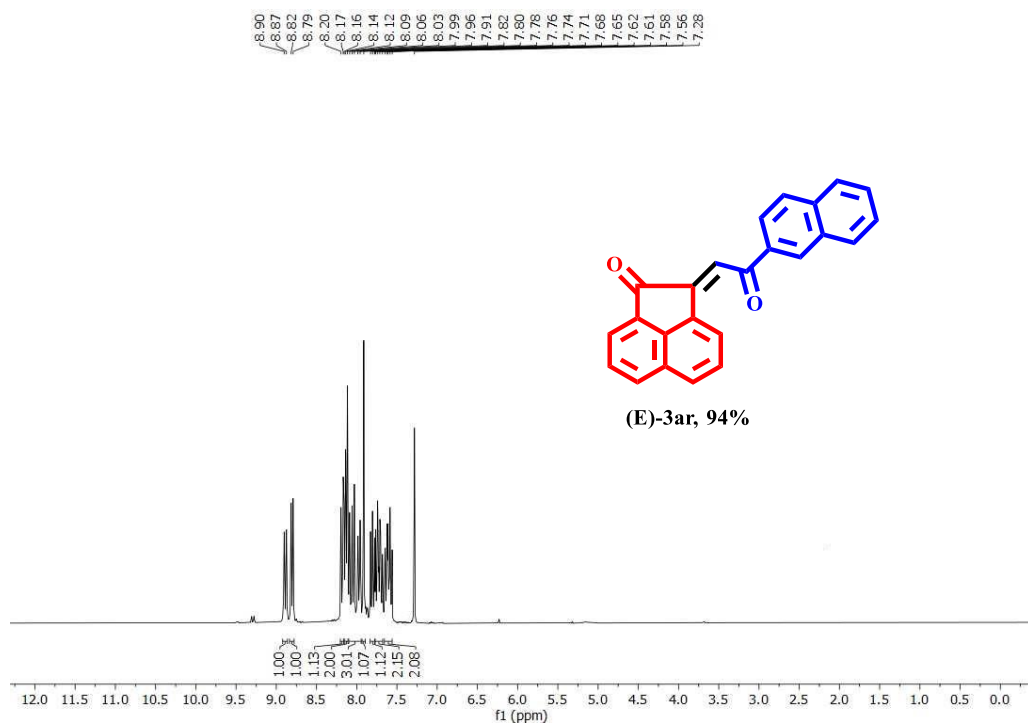

**<sup>1</sup>H NMR Spectrum of (E)-3ar**

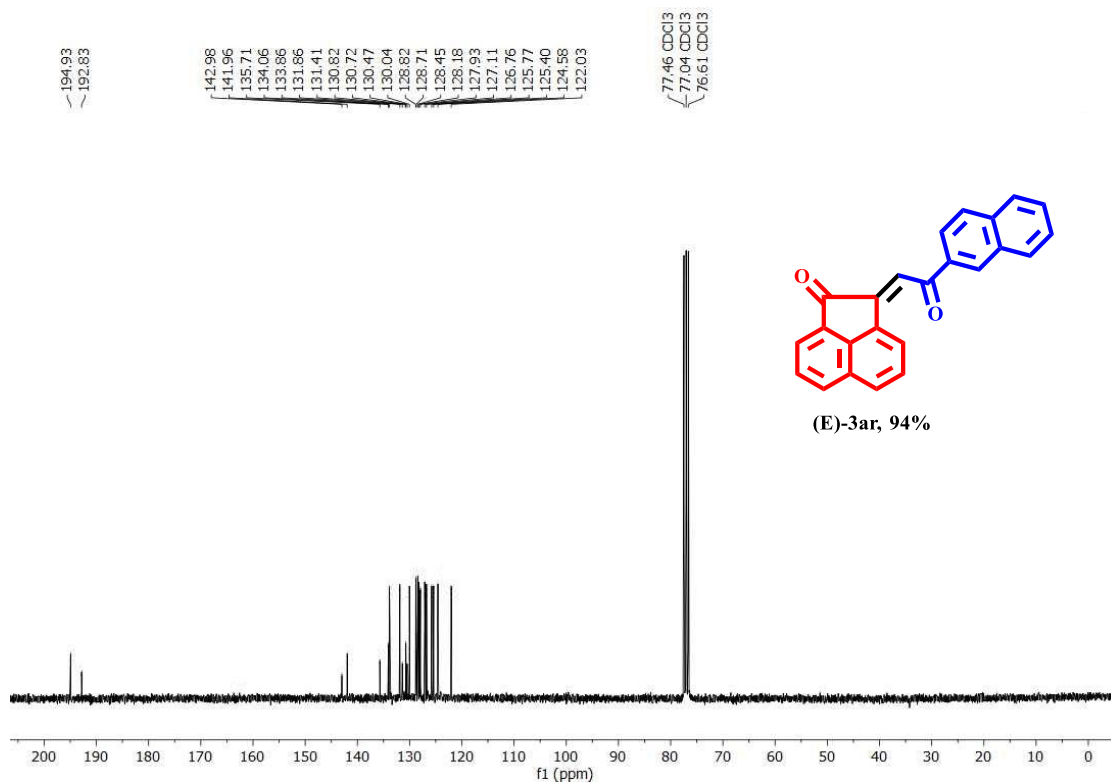

**<sup>13</sup>C NMR Spectrum of (E)-3ar**

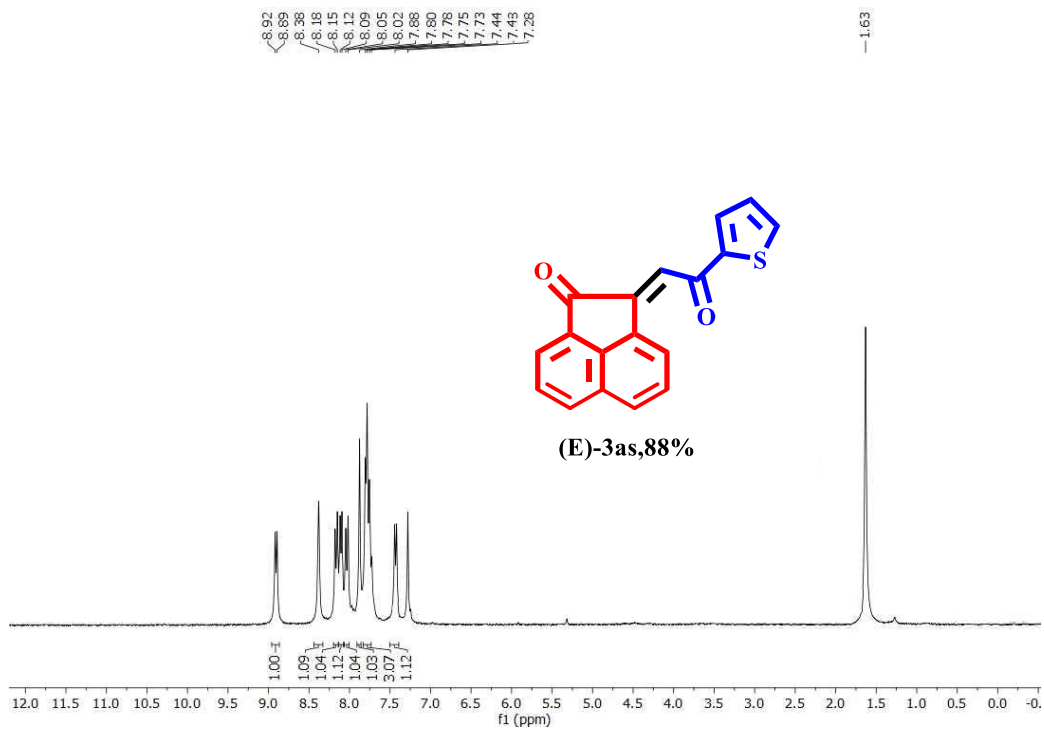

**<sup>1</sup>H NMR Spectrum of (E)-3as**

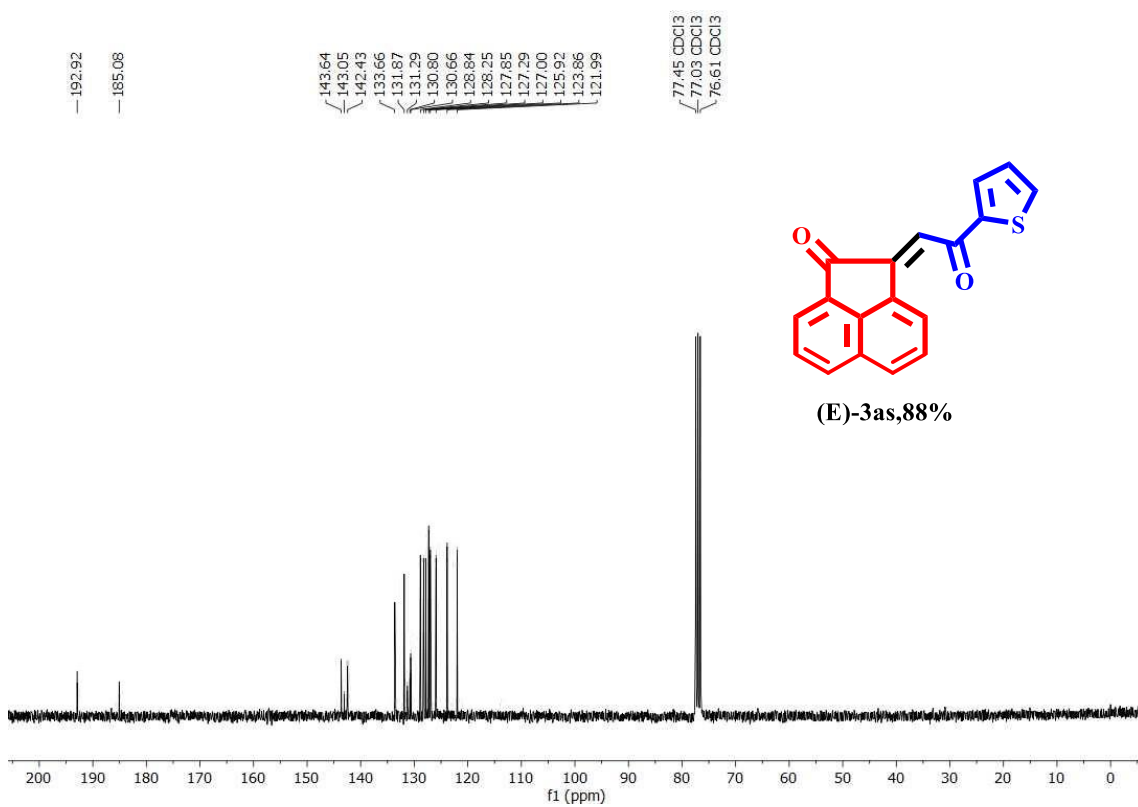

**<sup>13</sup>C NMR Spectrum of (E)-3as**

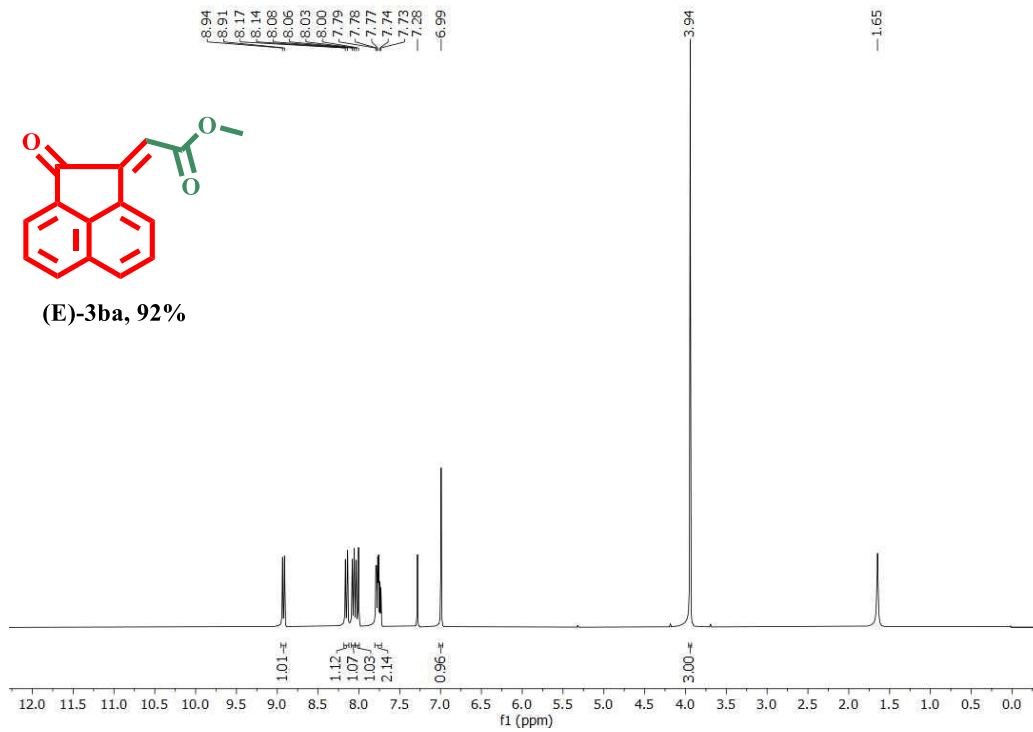

**<sup>1</sup>H NMR Spectrum of (E)-3ba**

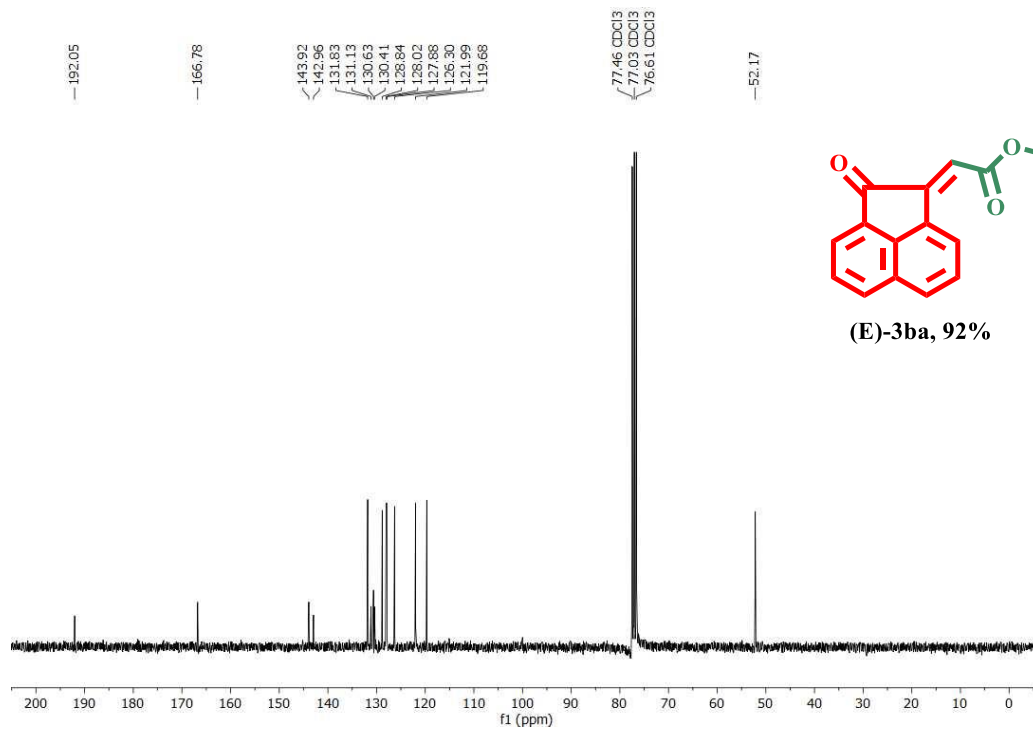

**<sup>13</sup>C NMR Spectrum of (E)-3ba**

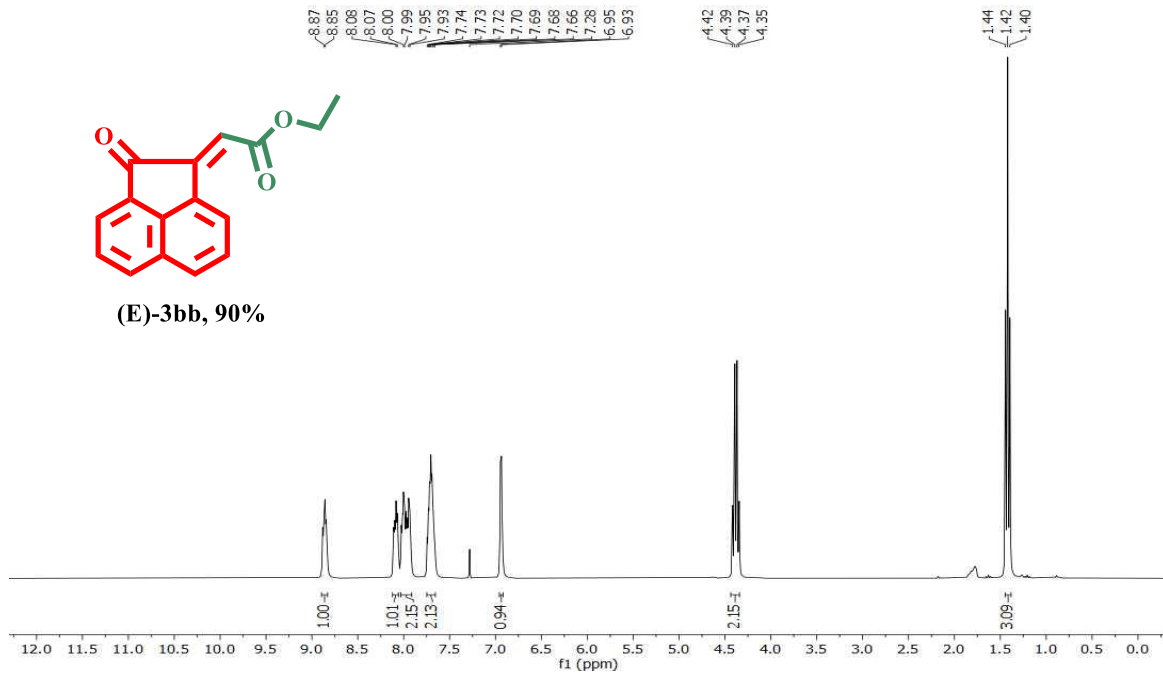

<sup>1</sup>H NMR Spectrum of (E)-3bb

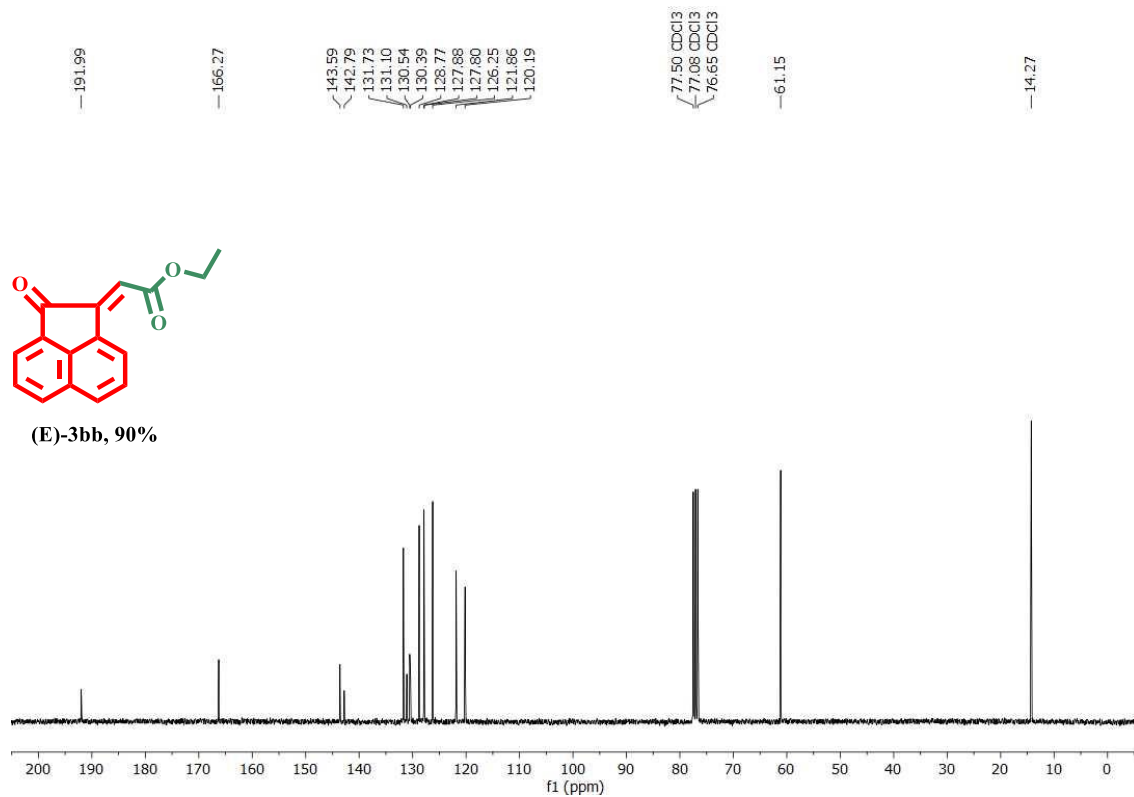

<sup>13</sup>C NMR Spectrum of (E)-3bb

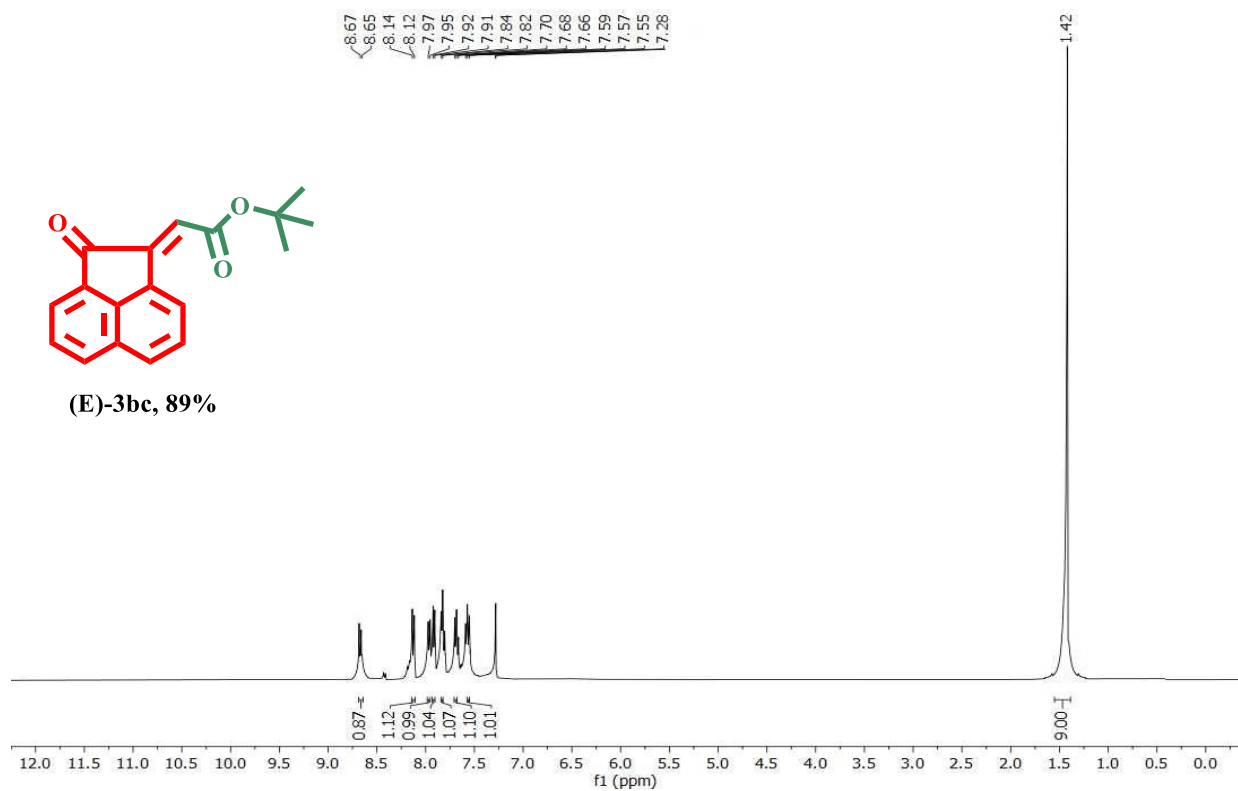

**<sup>1</sup>H NMR Spectrum of (E)-3bc**

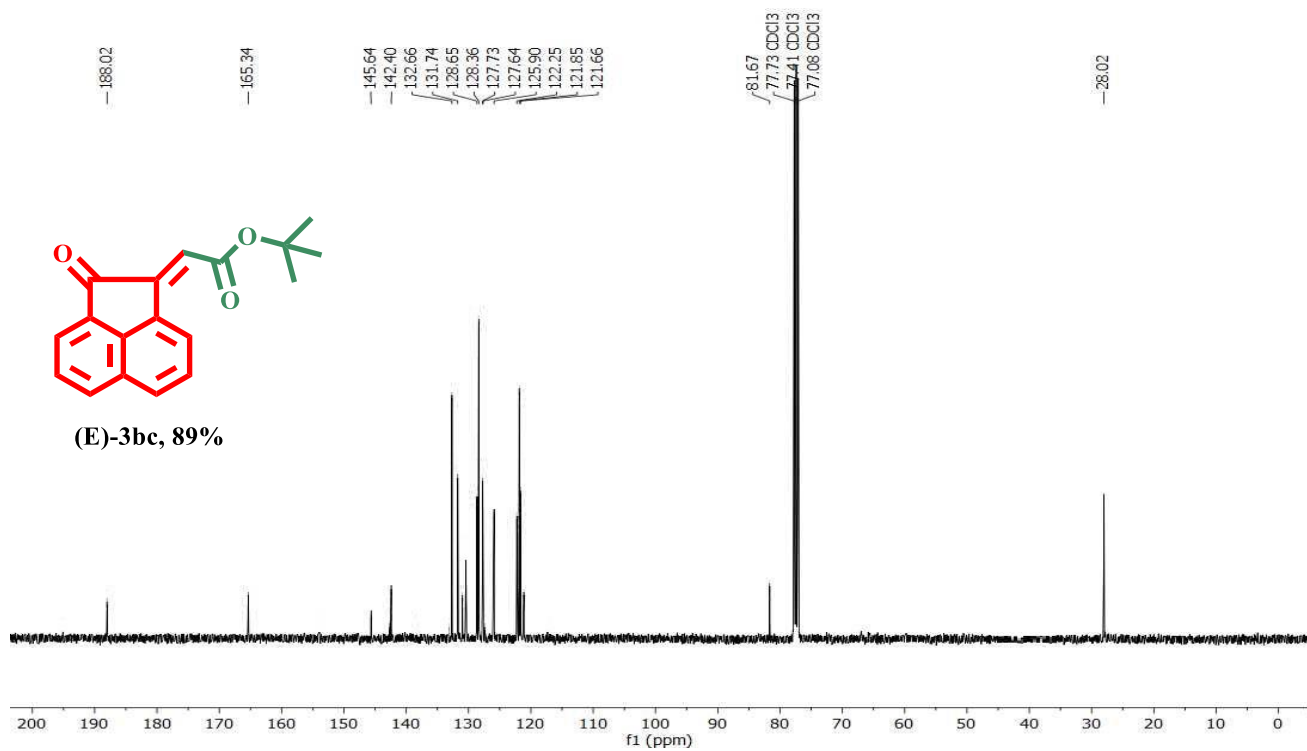

**<sup>13</sup>C NMR Spectrum of (E)-3bc**



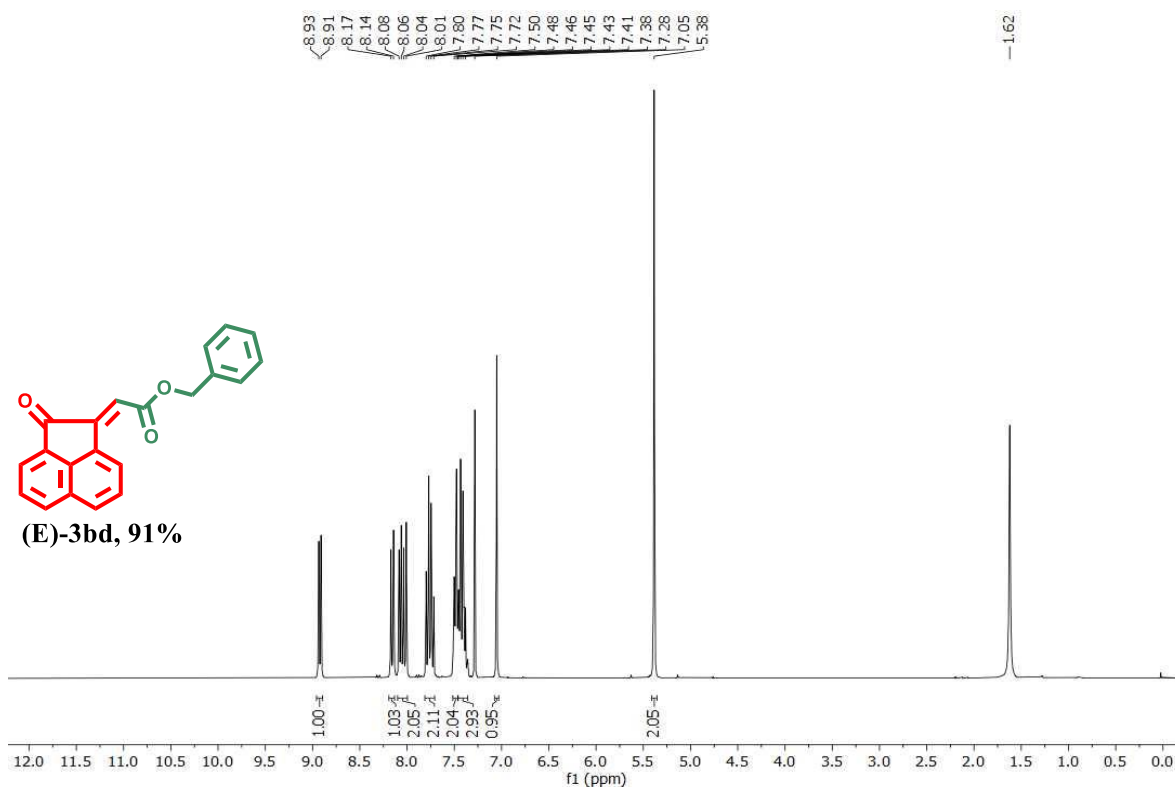

**<sup>1</sup>H NMR Spectrum of (E)-3bd**

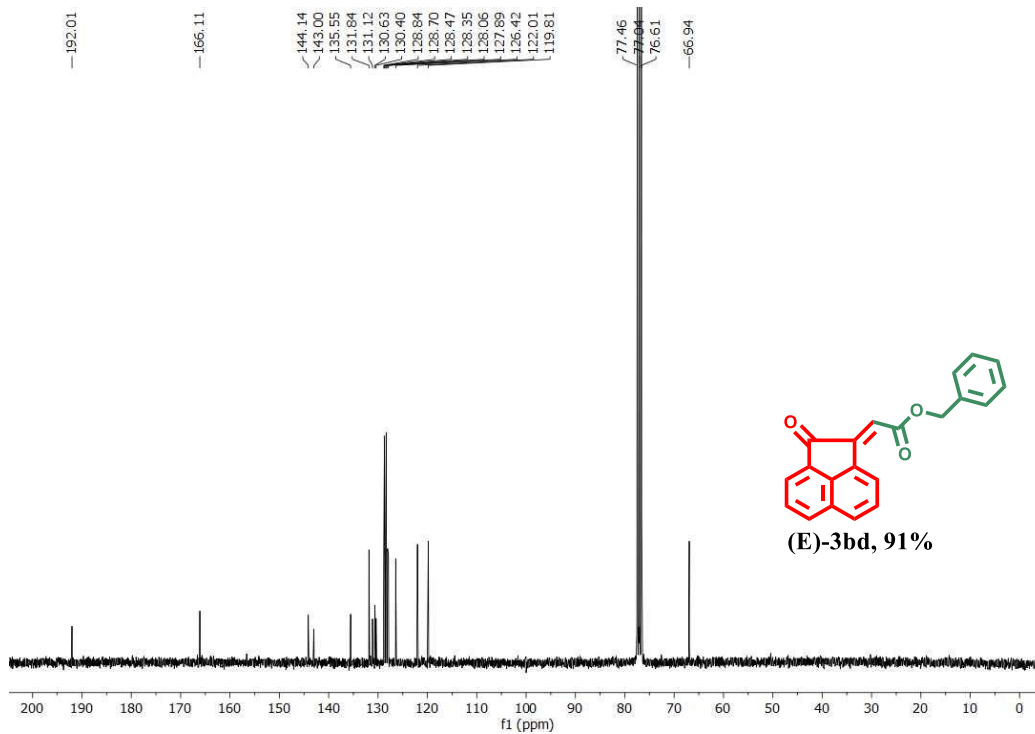

**<sup>13</sup>C NMR Spectrum of (E)-3bd**

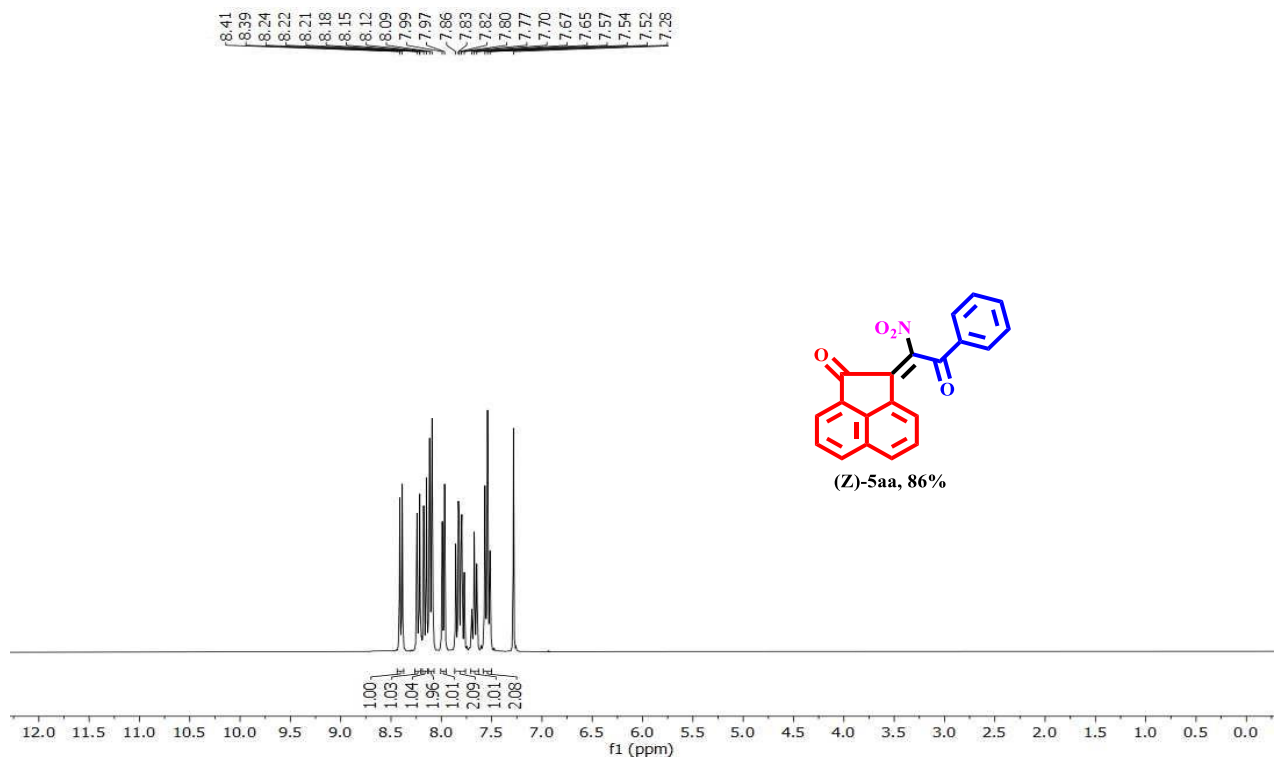

**<sup>1</sup>H NMR Spectrum of (Z)-5aa**

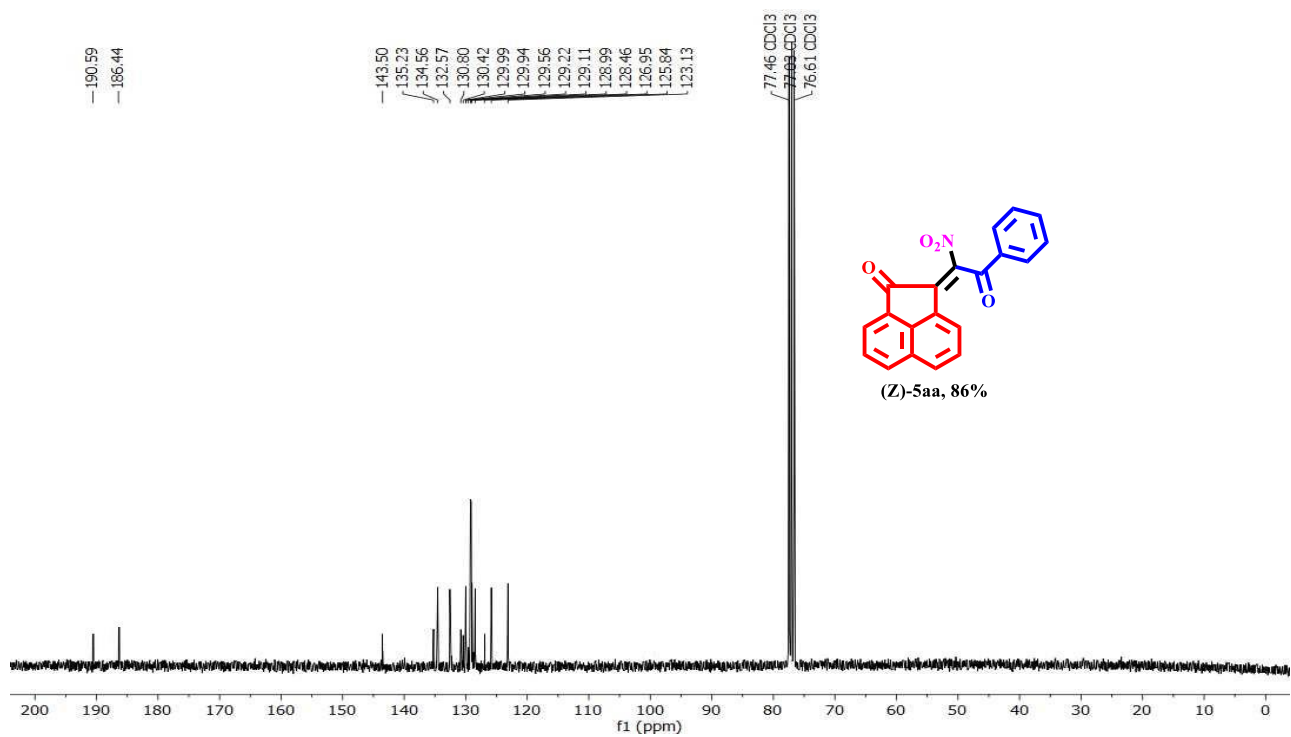

**<sup>13</sup>C NMR Spectrum of (Z)-5aa**

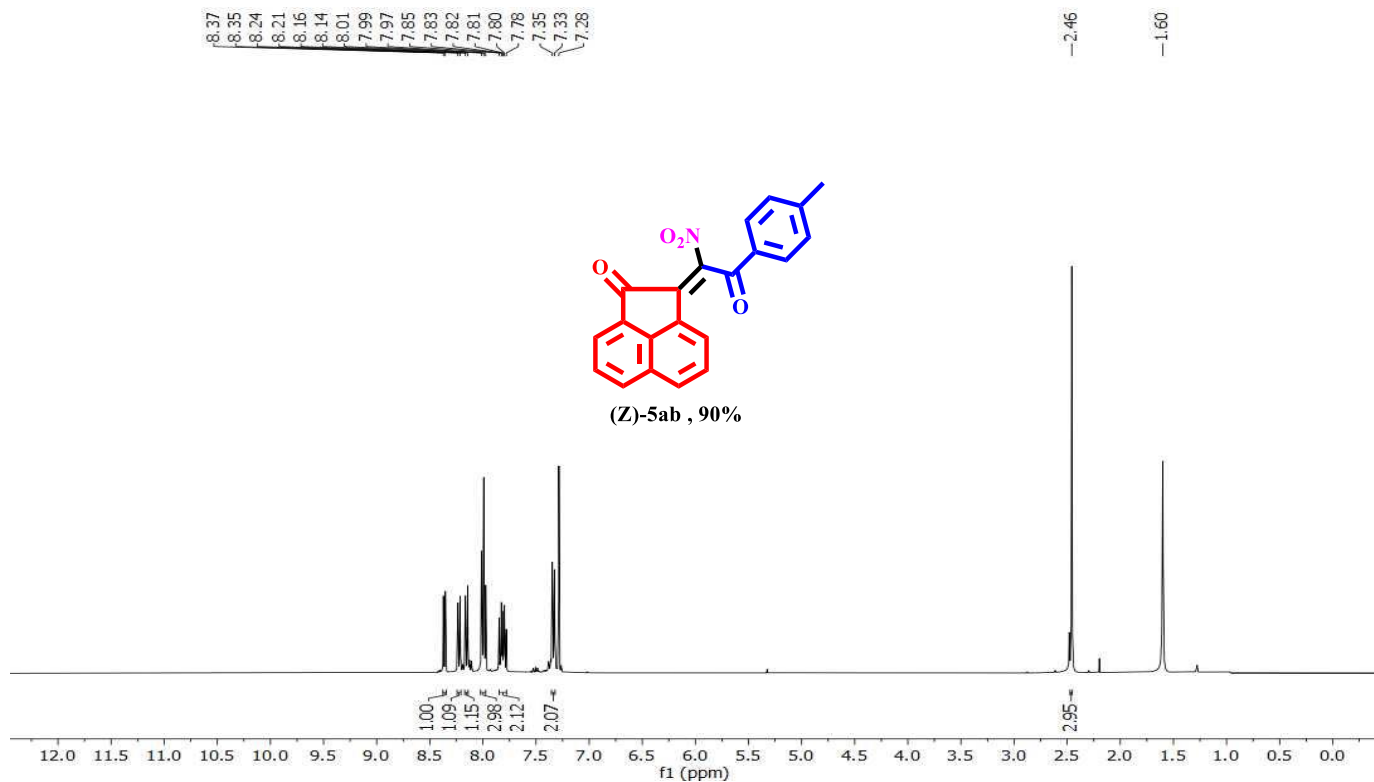

**<sup>1</sup>H NMR Spectrum of (Z)-5ab**

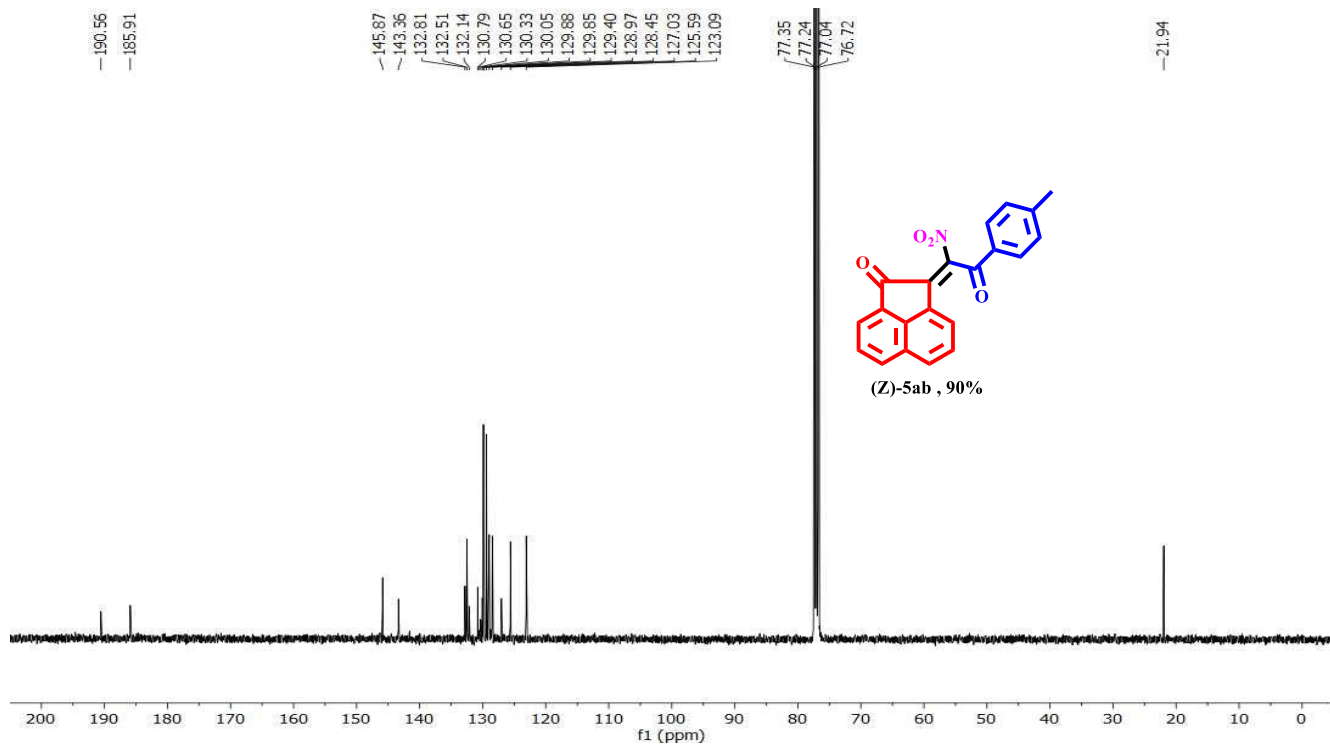

**<sup>13</sup>C NMR Spectrum of (Z)-5ab**

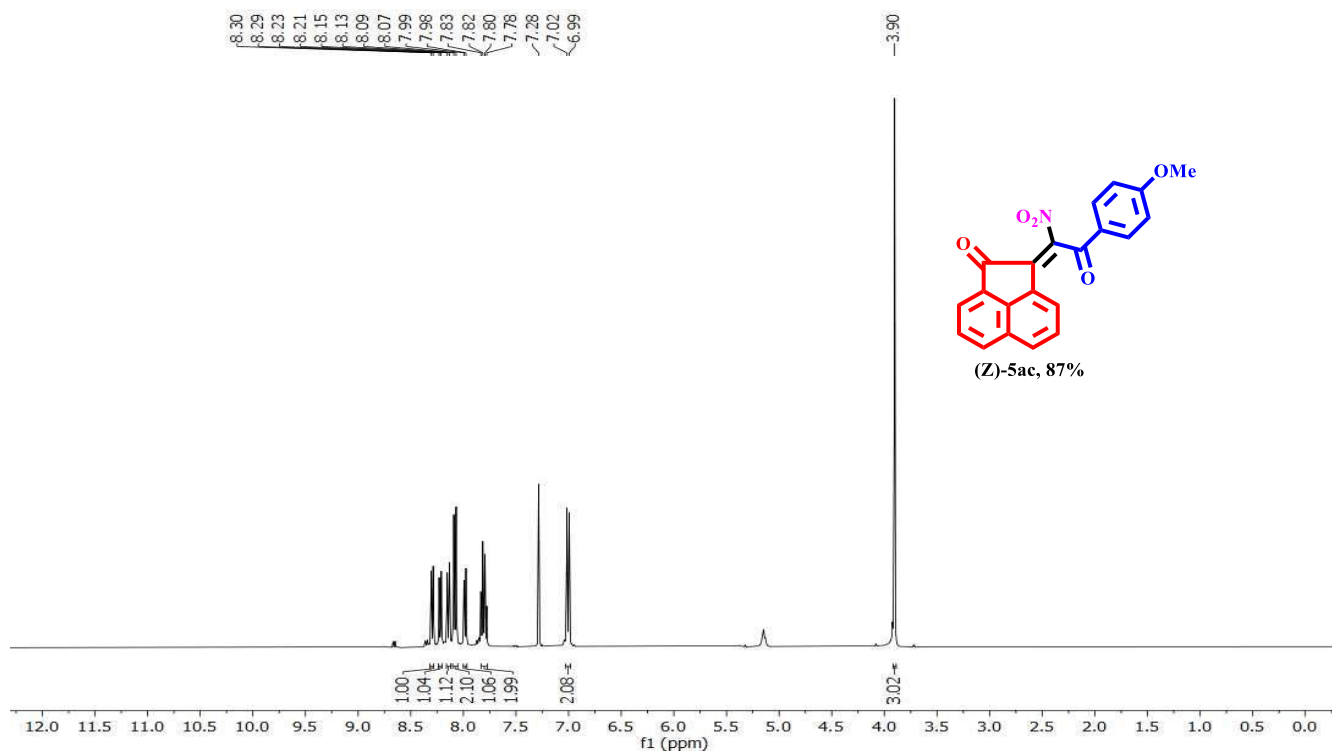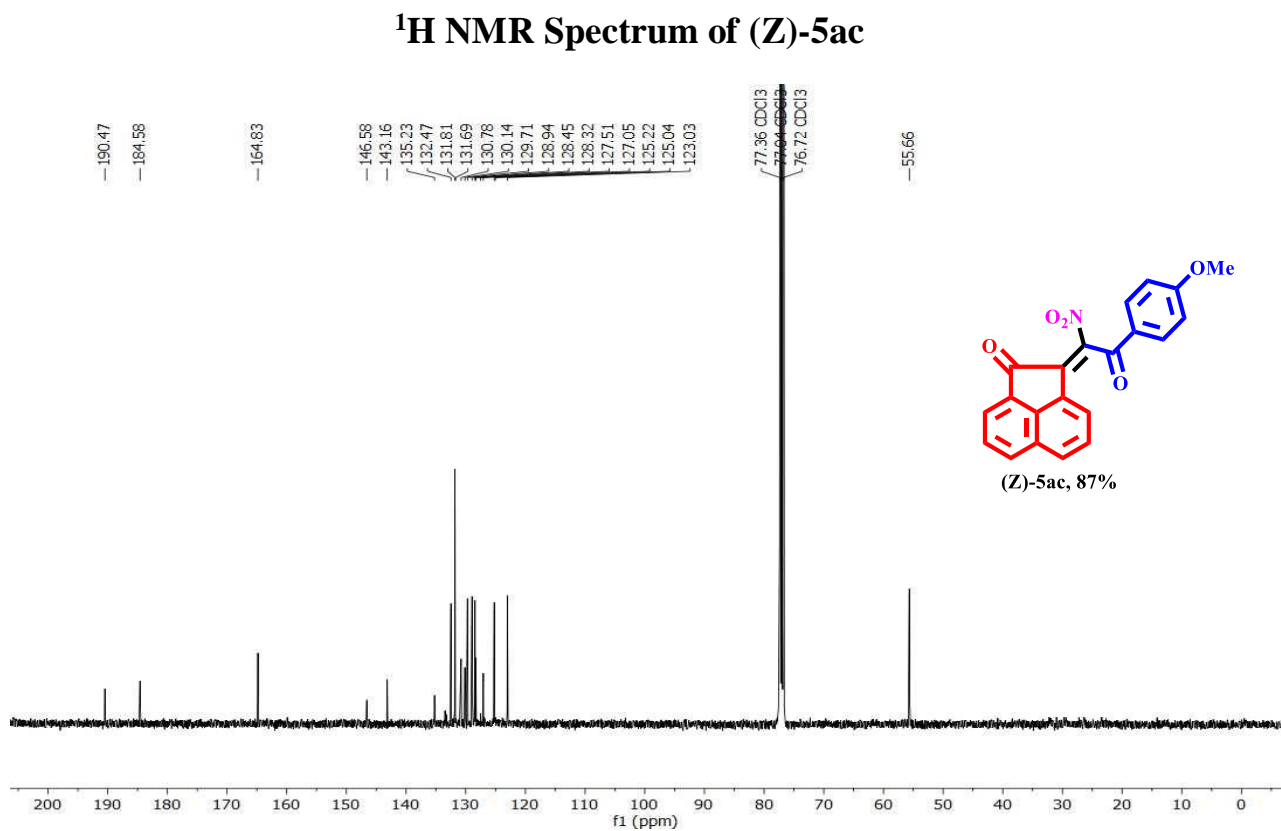

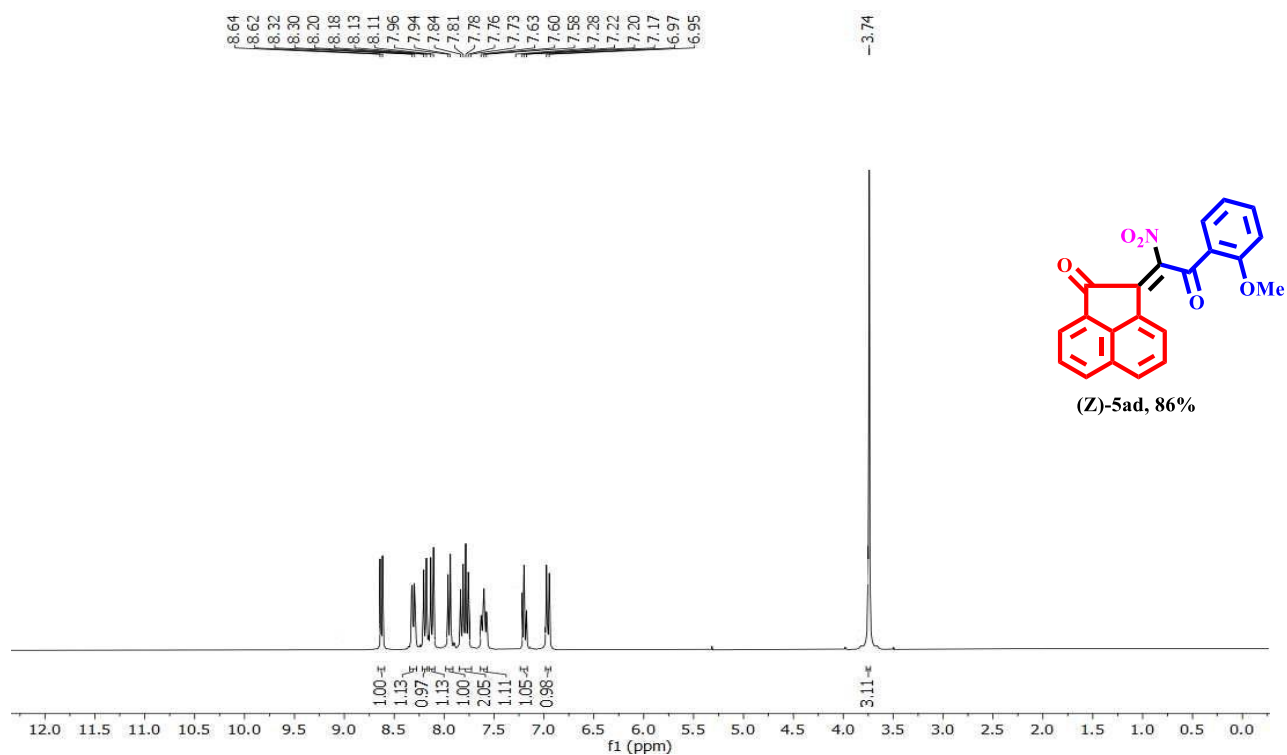

**$^1\text{H}$  NMR Spectrum of (Z)-5ad**

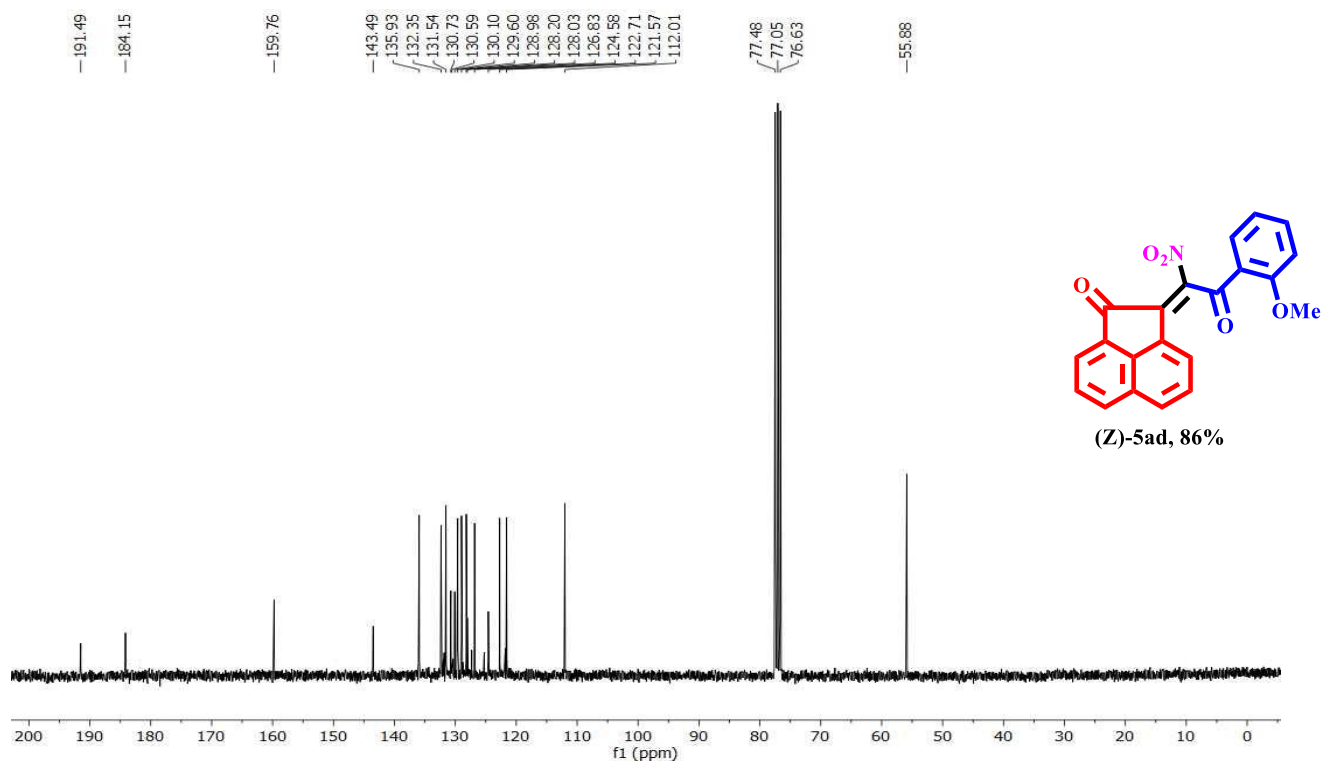

**$^{13}\text{C}$  NMR Spectrum of (Z)-5ad**

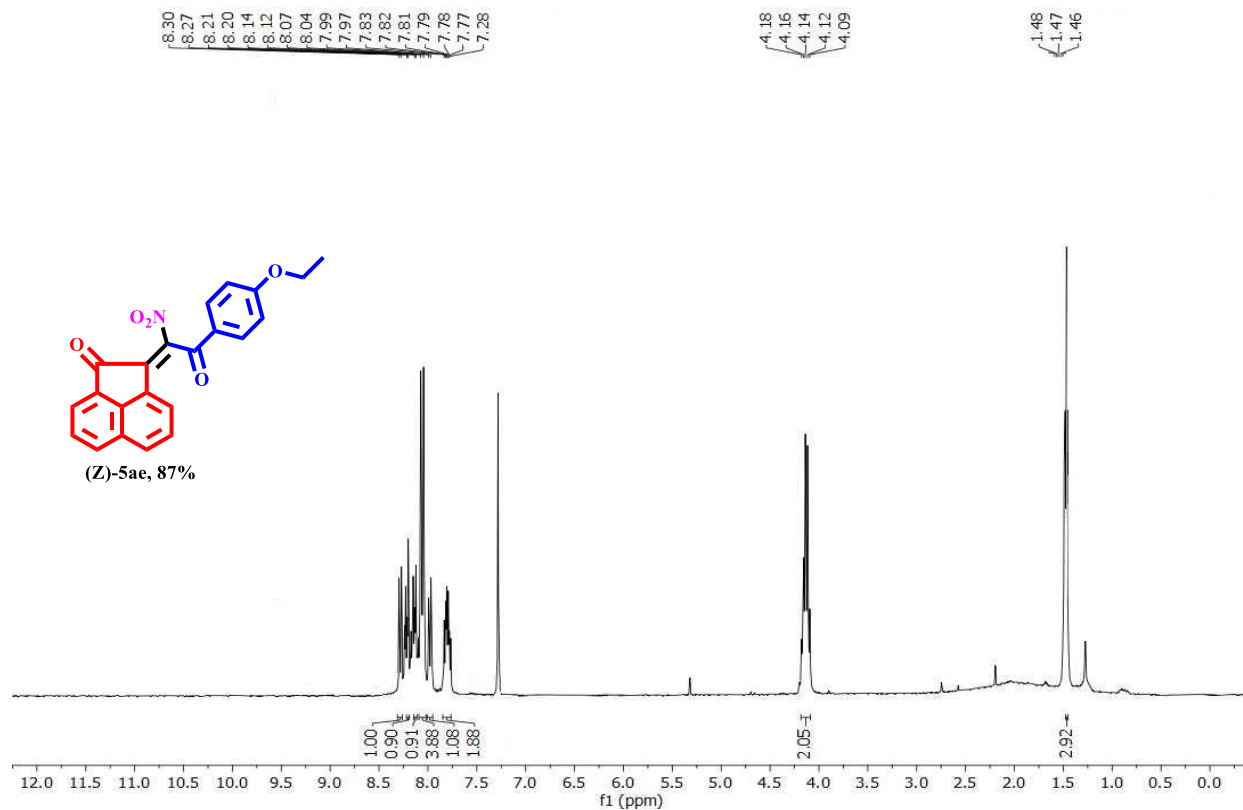

**<sup>1</sup>H NMR Spectrum of (Z)-5ae**

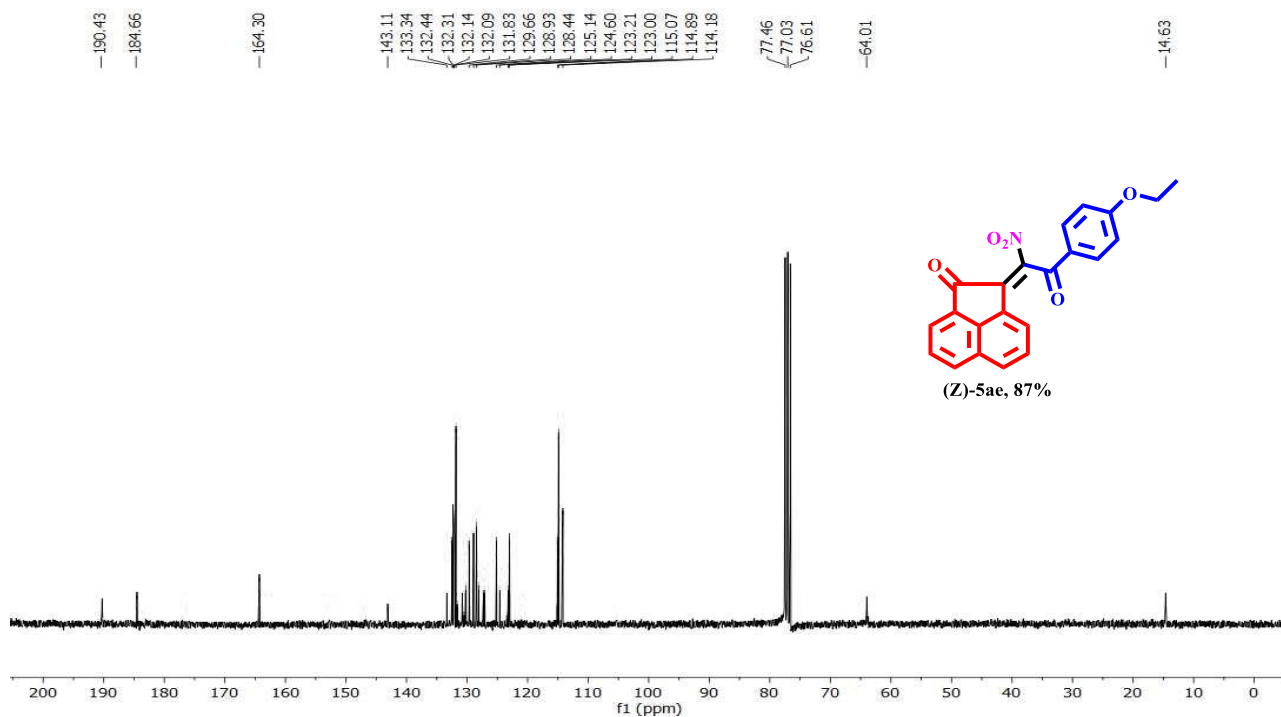

**<sup>13</sup>C NMR Spectrum of (Z)-5ae**

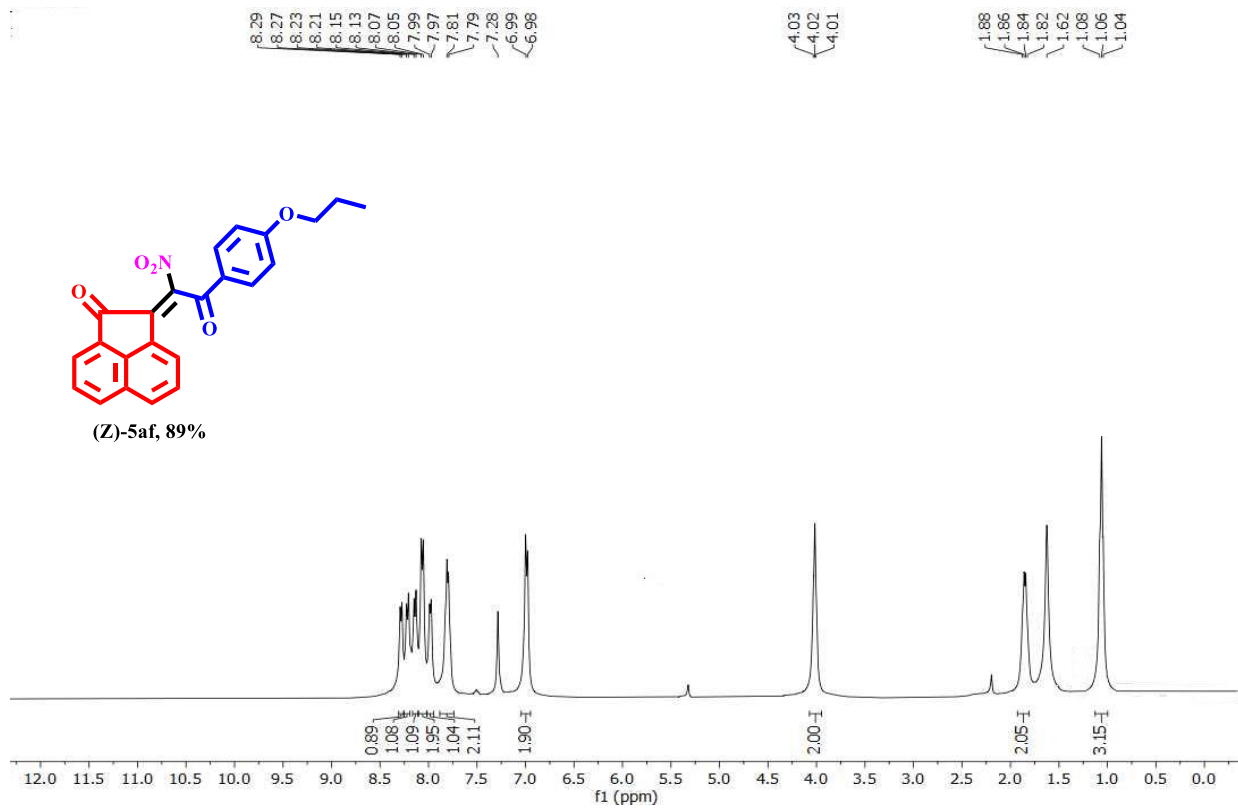

**<sup>1</sup>H NMR Spectrum of (Z)-5af**

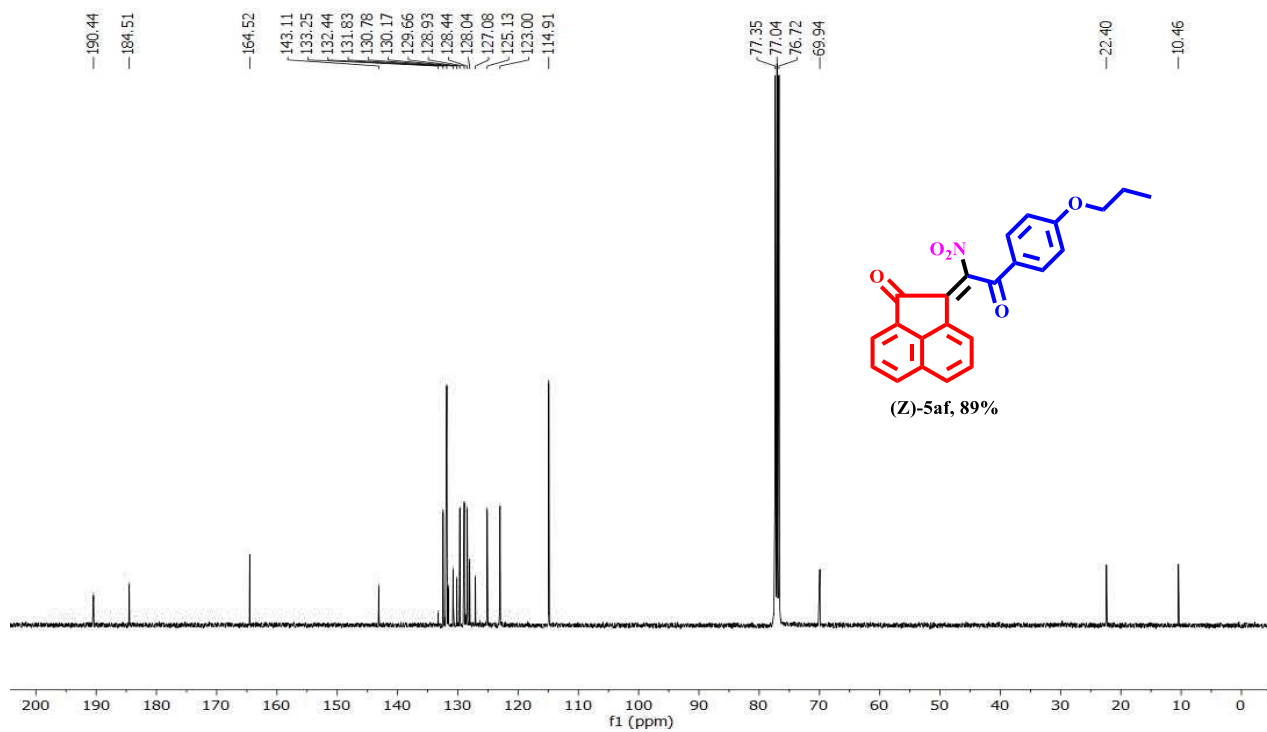

**<sup>13</sup>C NMR Spectrum of (Z)-5af**

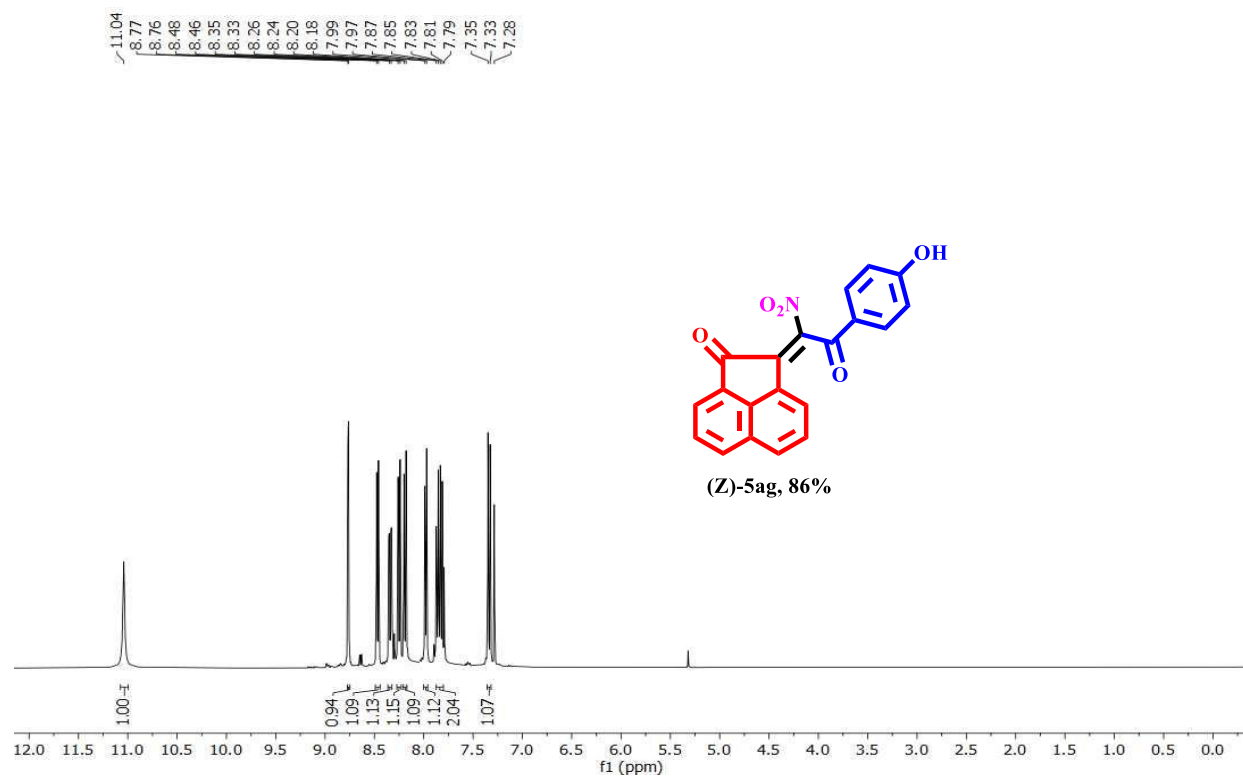

**<sup>1</sup>H NMR Spectrum of (Z)-5ag**

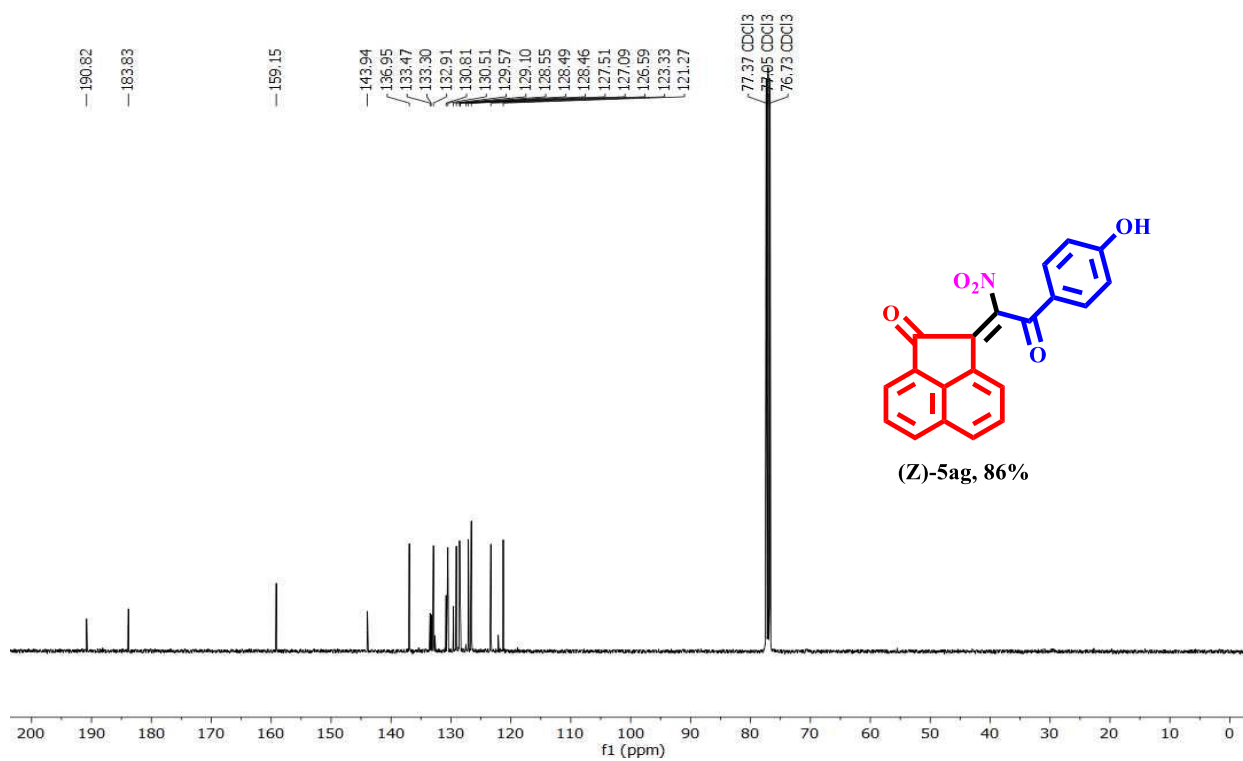

**<sup>13</sup>C NMR Spectrum of (Z)-5ag**



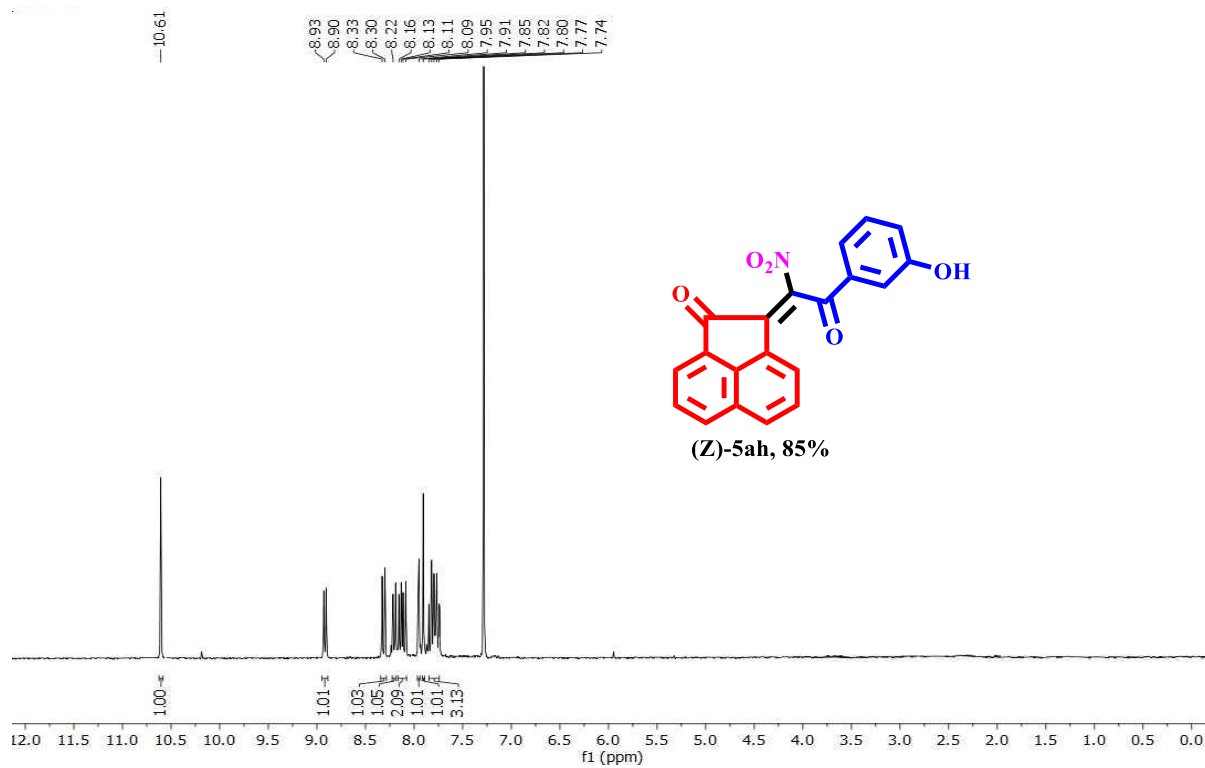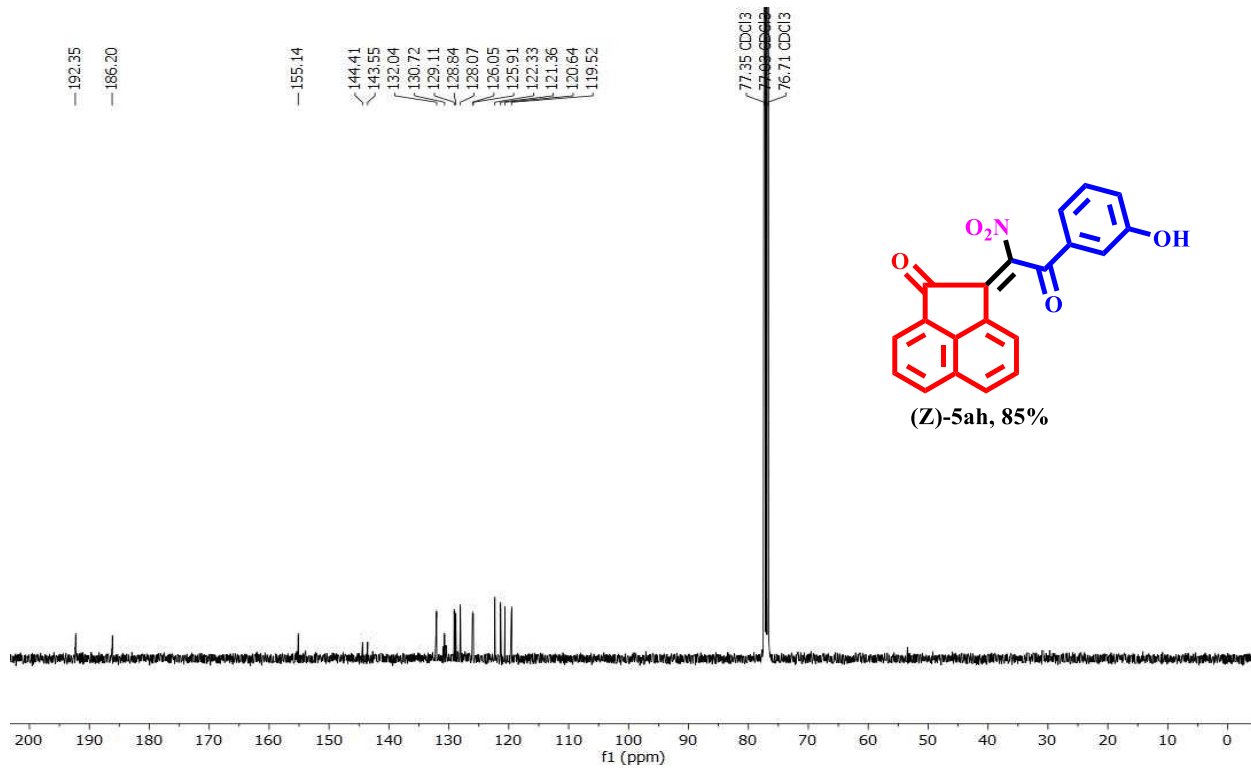

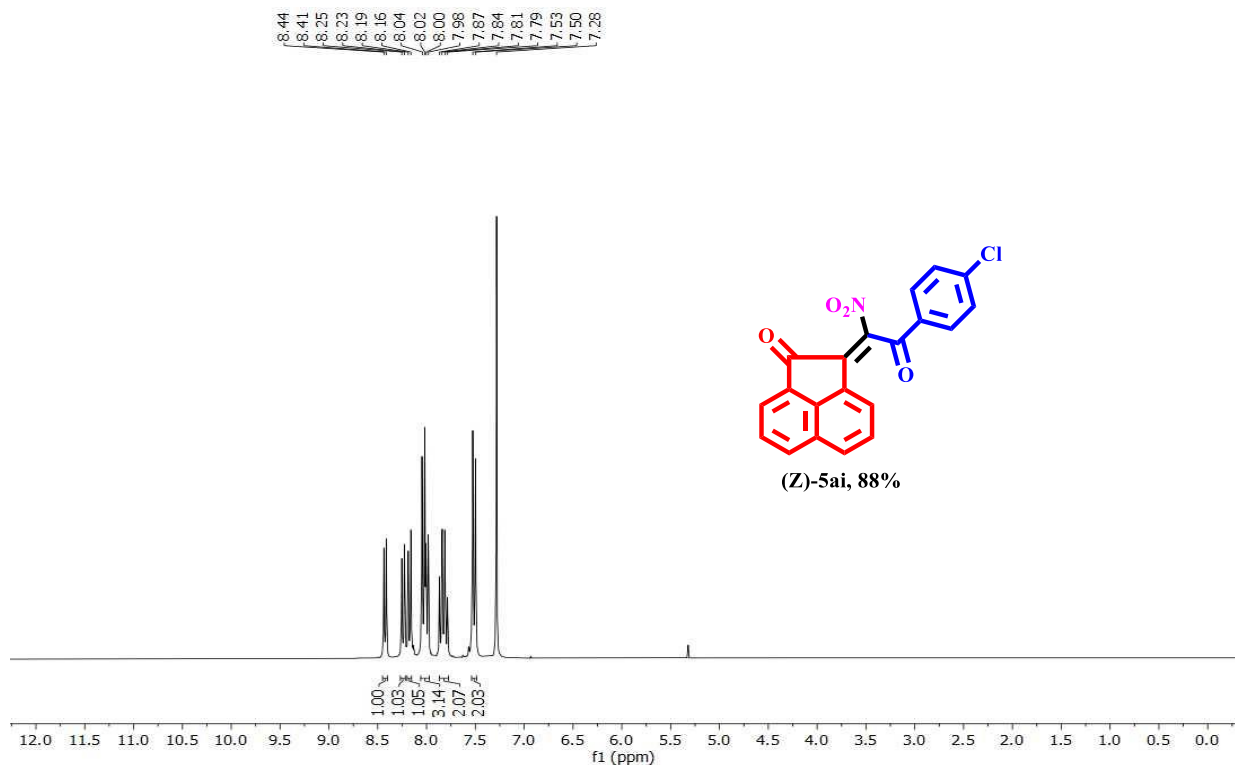

### <sup>1</sup>H NMR Spectrum of (Z)-5ai

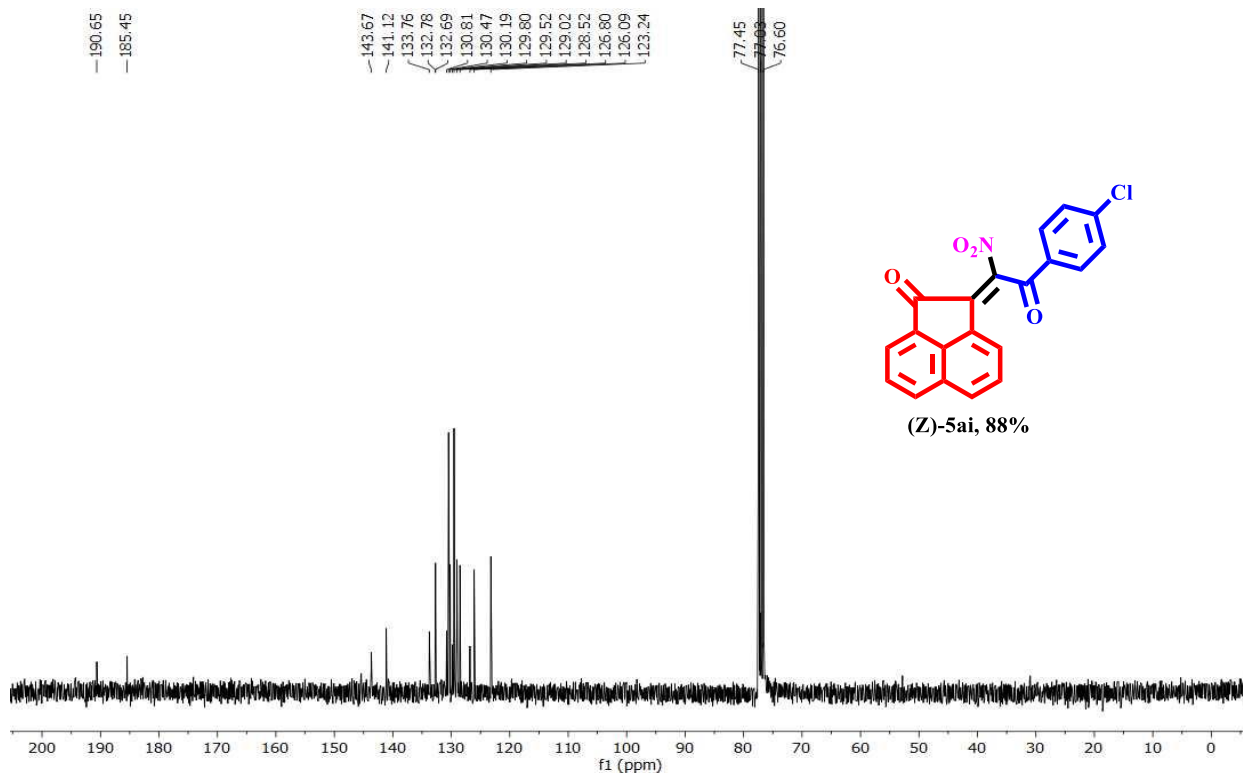

### <sup>13</sup>C NMR Spectrum of (Z)-5ai

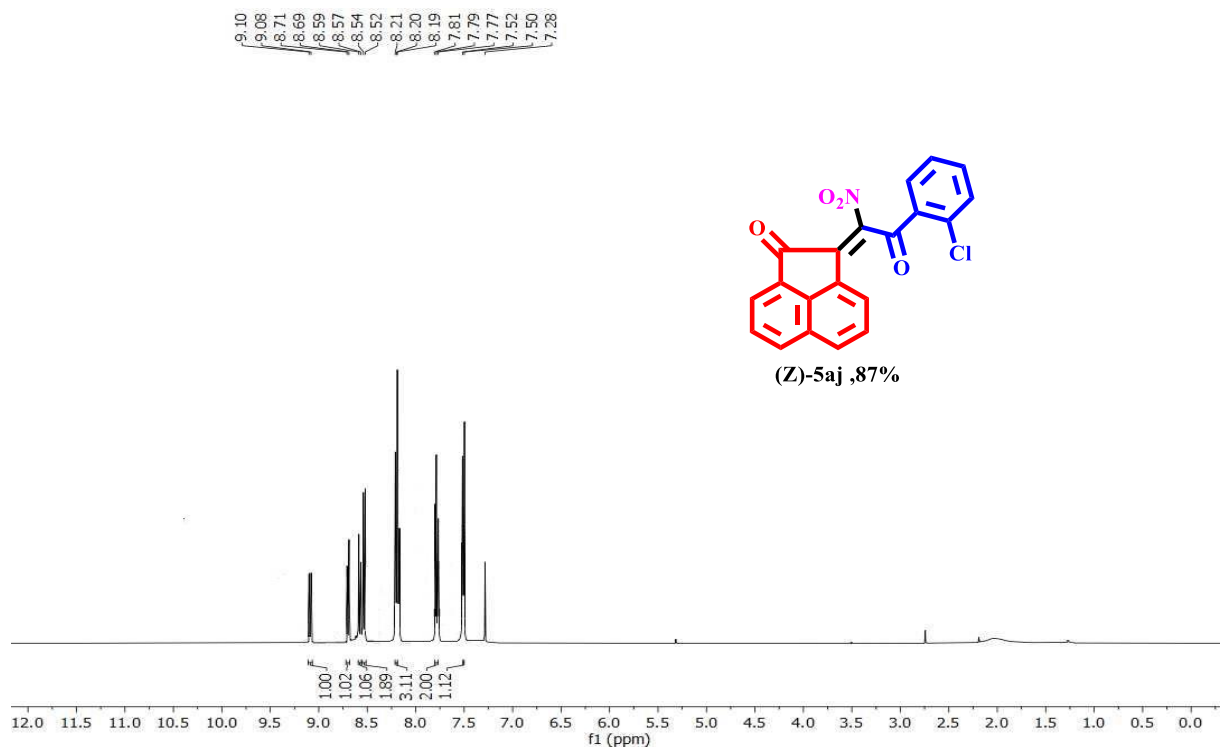

**<sup>1</sup>H NMR Spectrum of (Z)-5aj**

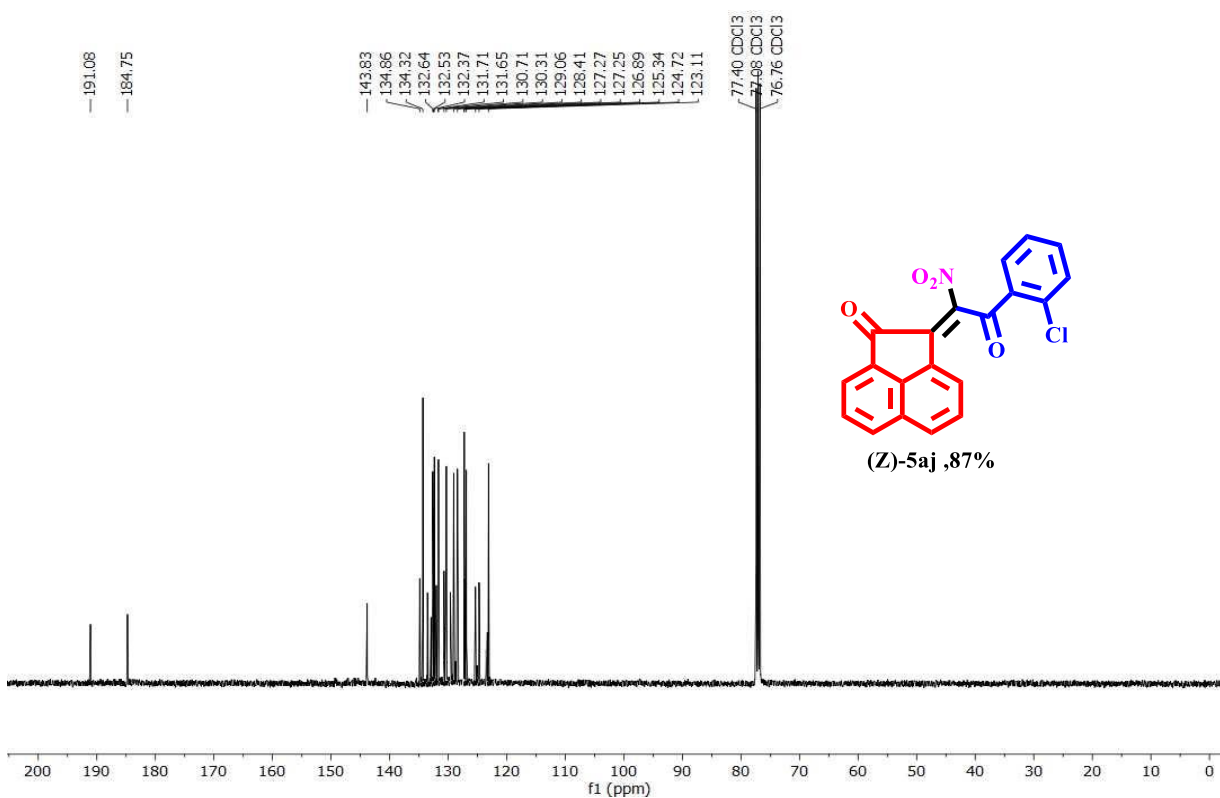

**<sup>13</sup>C NMR Spectrum of (Z)-5aj**

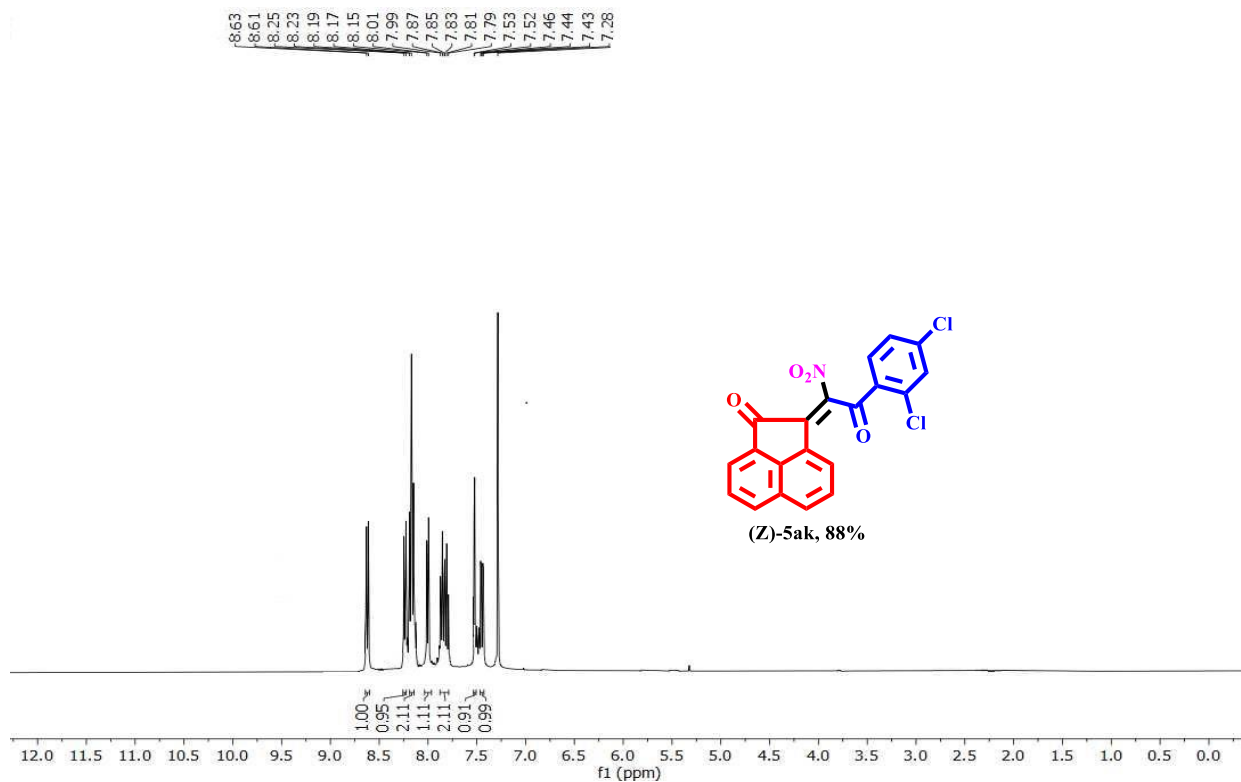

**<sup>1</sup>H NMR Spectrum of (Z)-5ak**

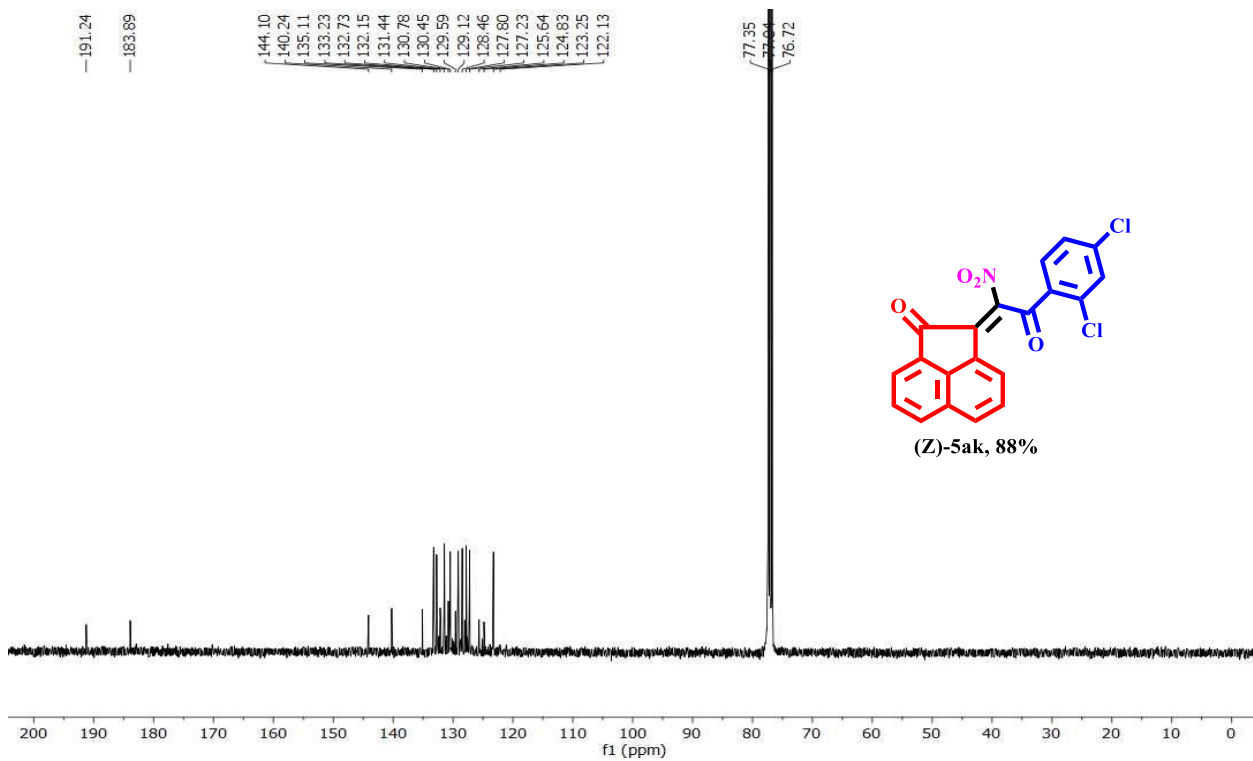

**<sup>13</sup>C NMR Spectrum of (Z)-5ak**

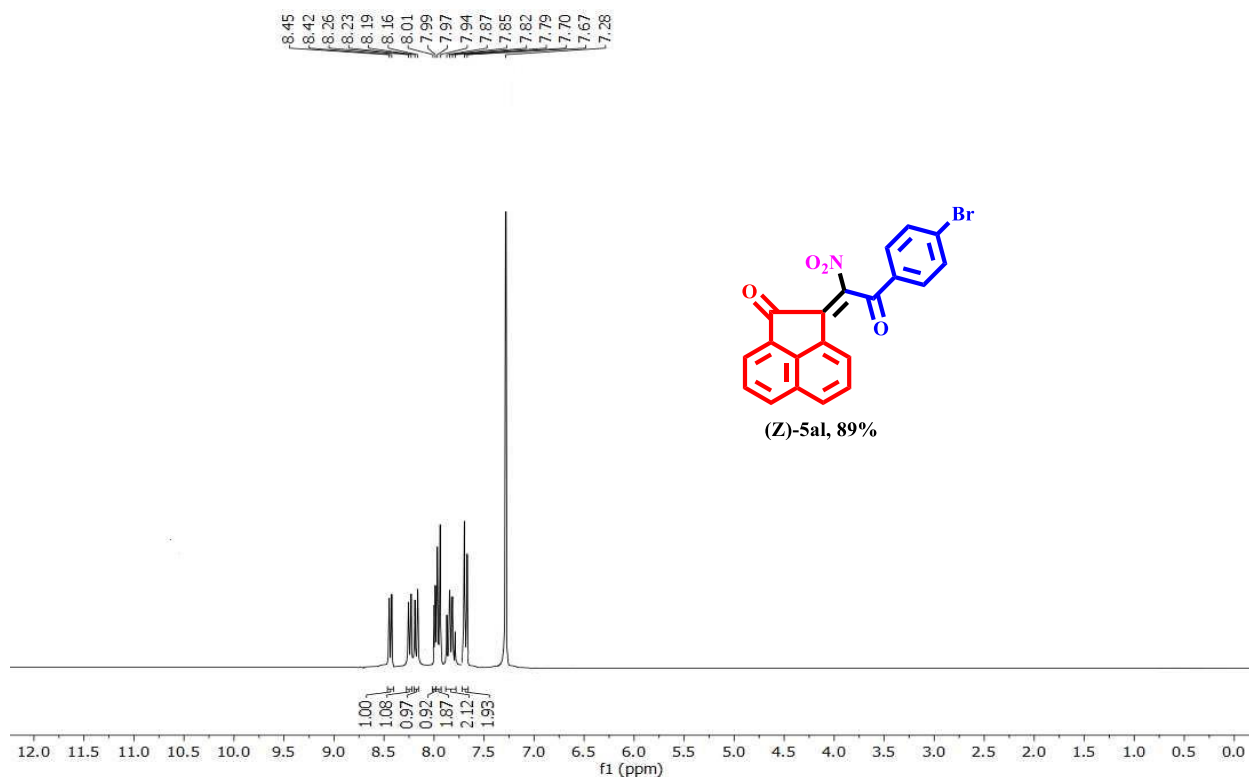

**<sup>1</sup>H NMR Spectrum of (Z)-5al**

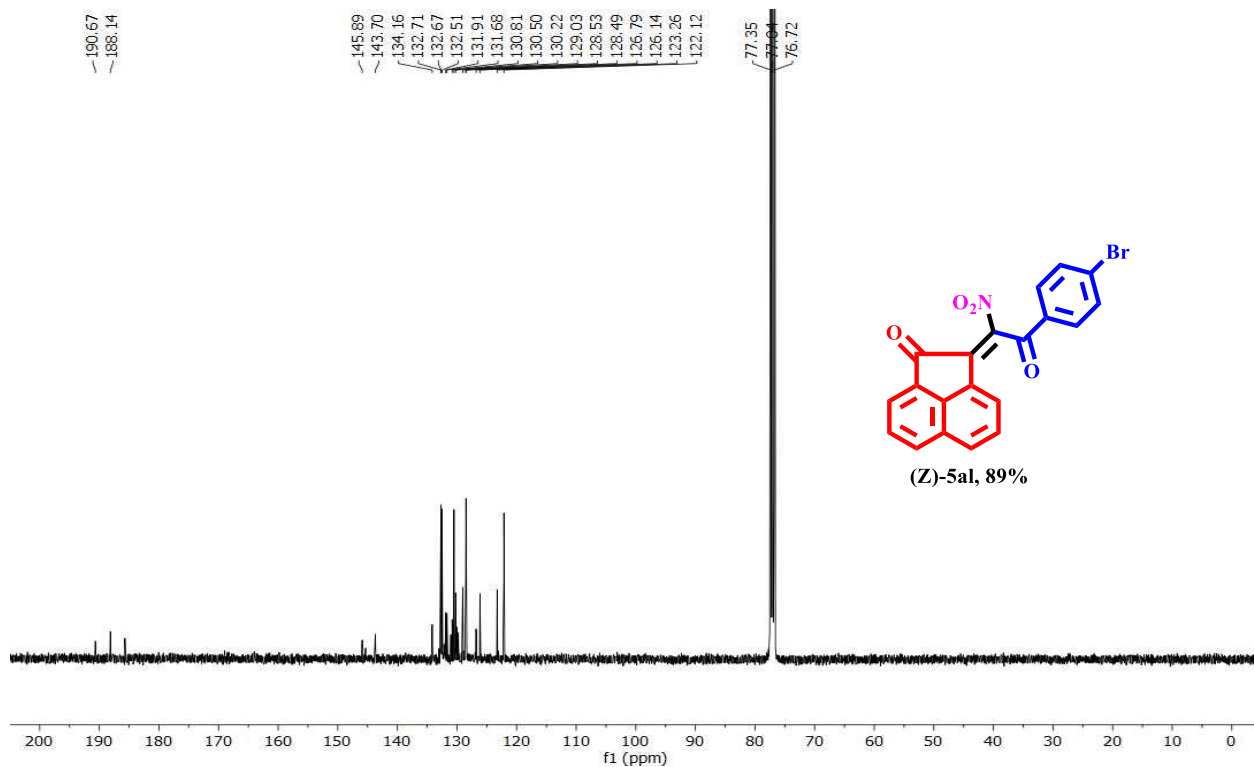

**<sup>13</sup>C NMR Spectrum of (Z)-5al**

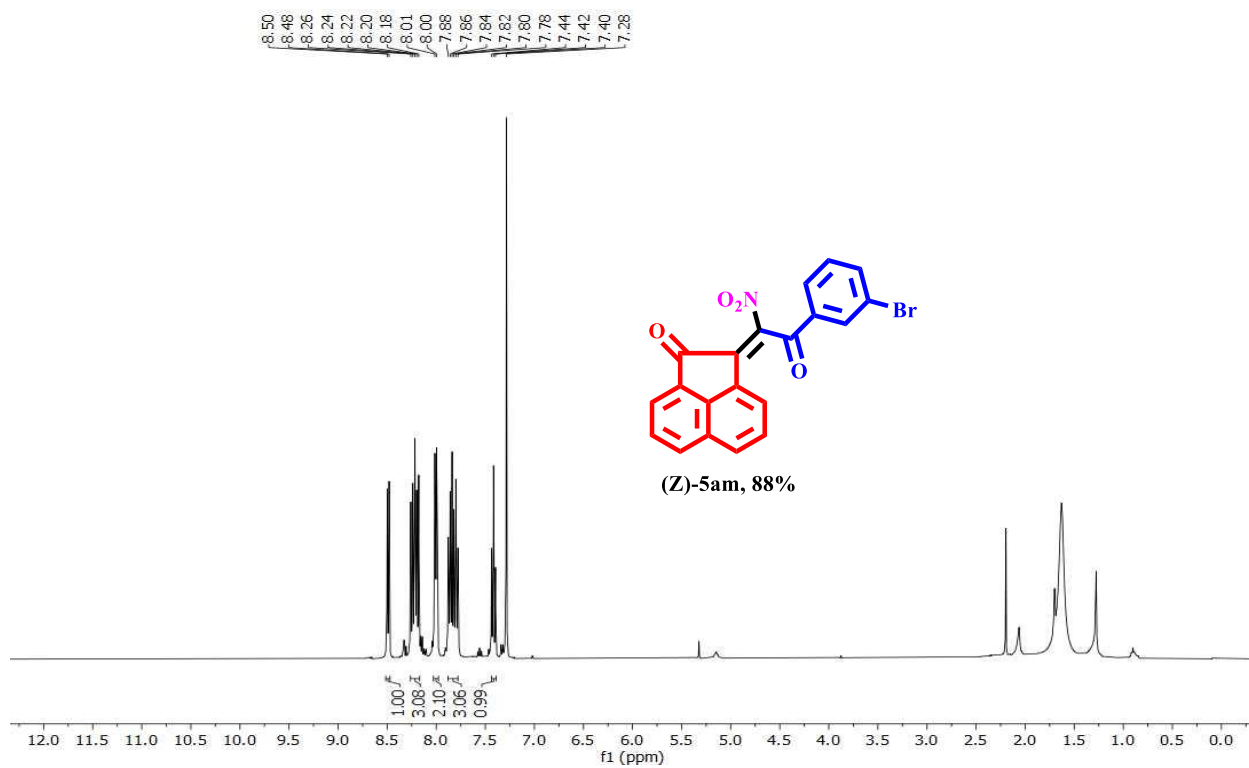

**<sup>1</sup>H NMR Spectrum of (Z)-5am**

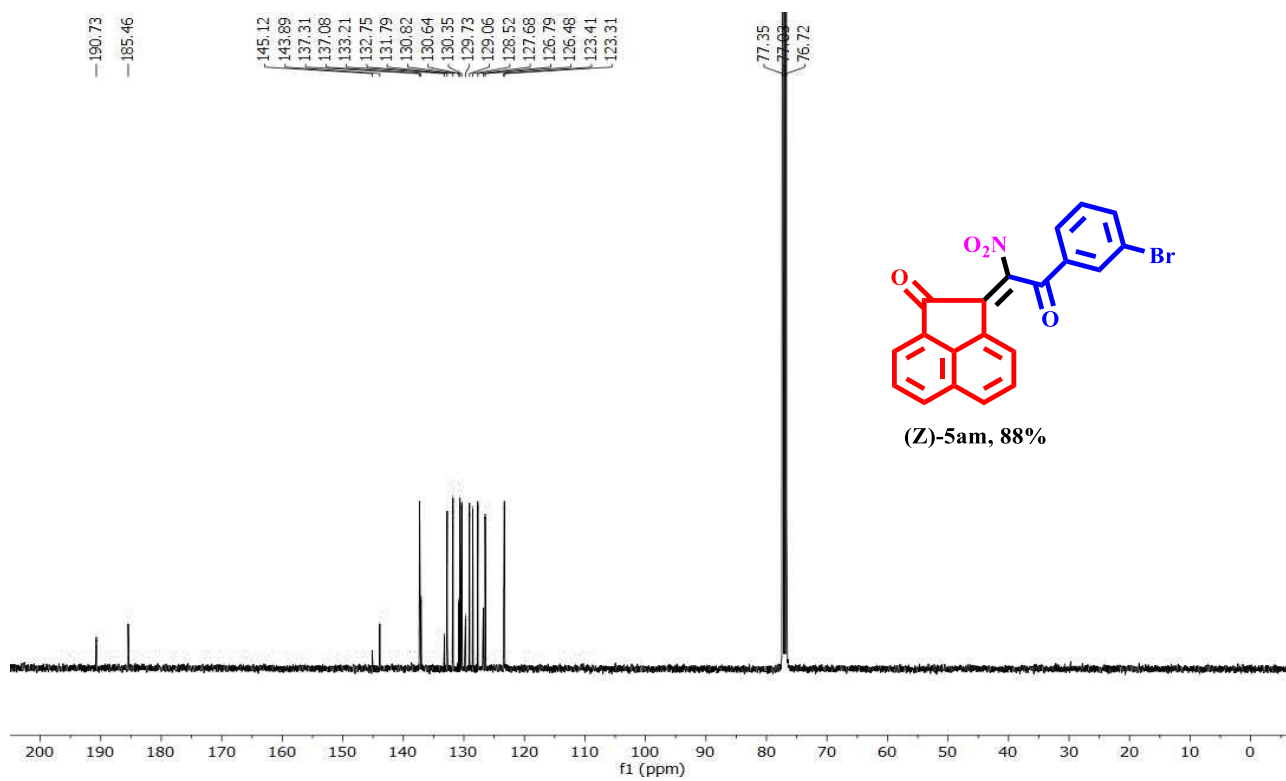

**<sup>13</sup>C NMR Spectrum of (Z)-5am**

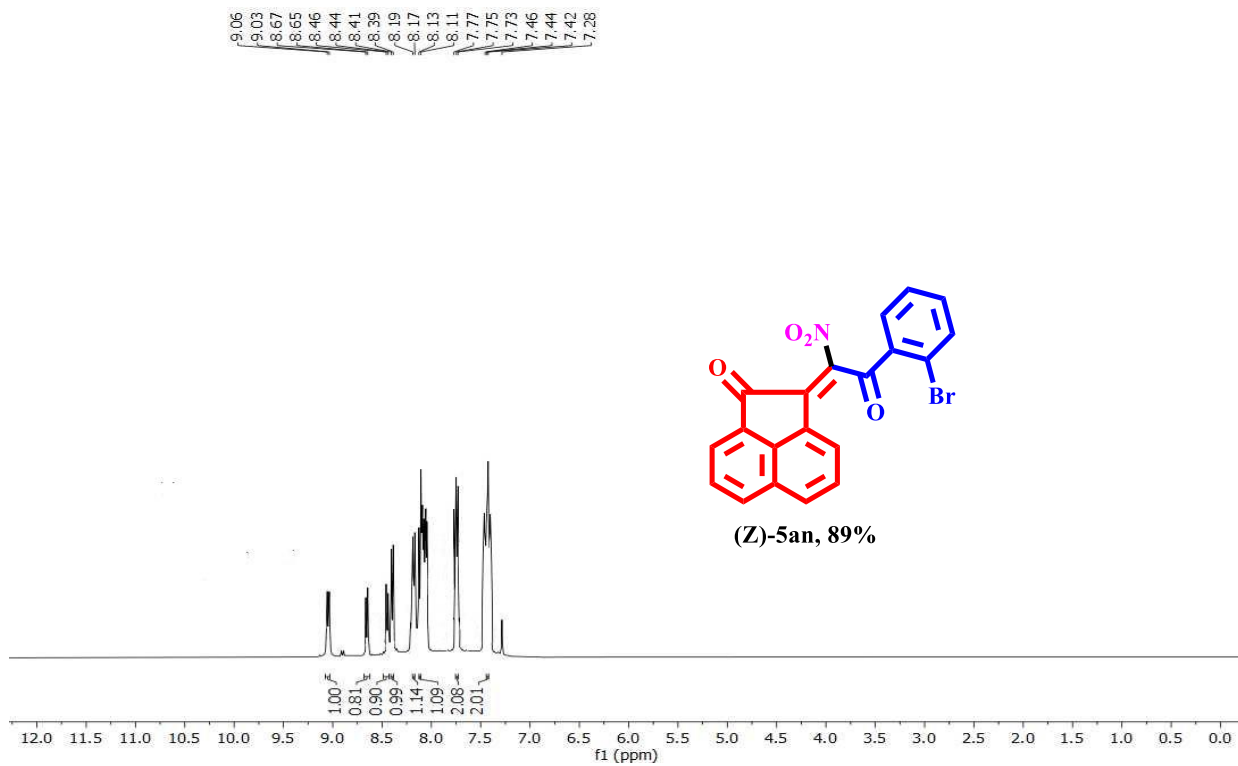

**<sup>1</sup>H NMR Spectrum of (Z)-5an**

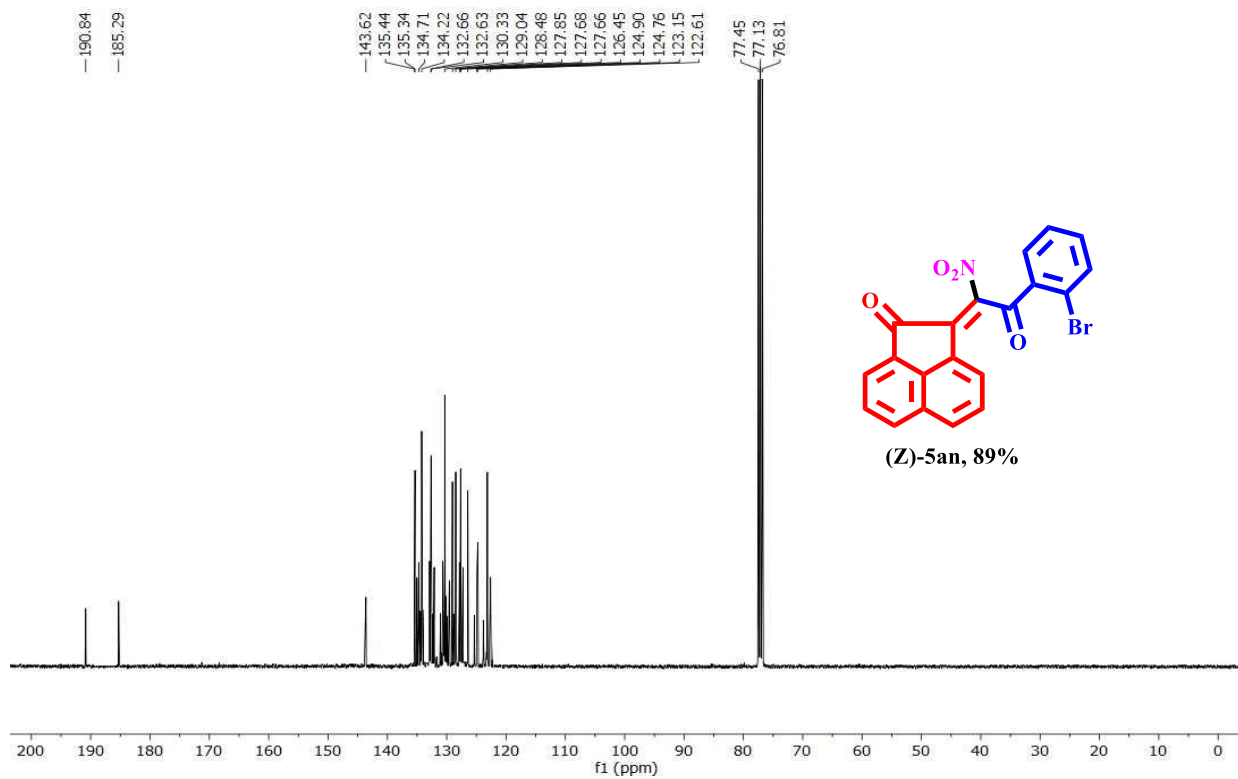

**<sup>13</sup>C NMR Spectrum of (Z)-5an**

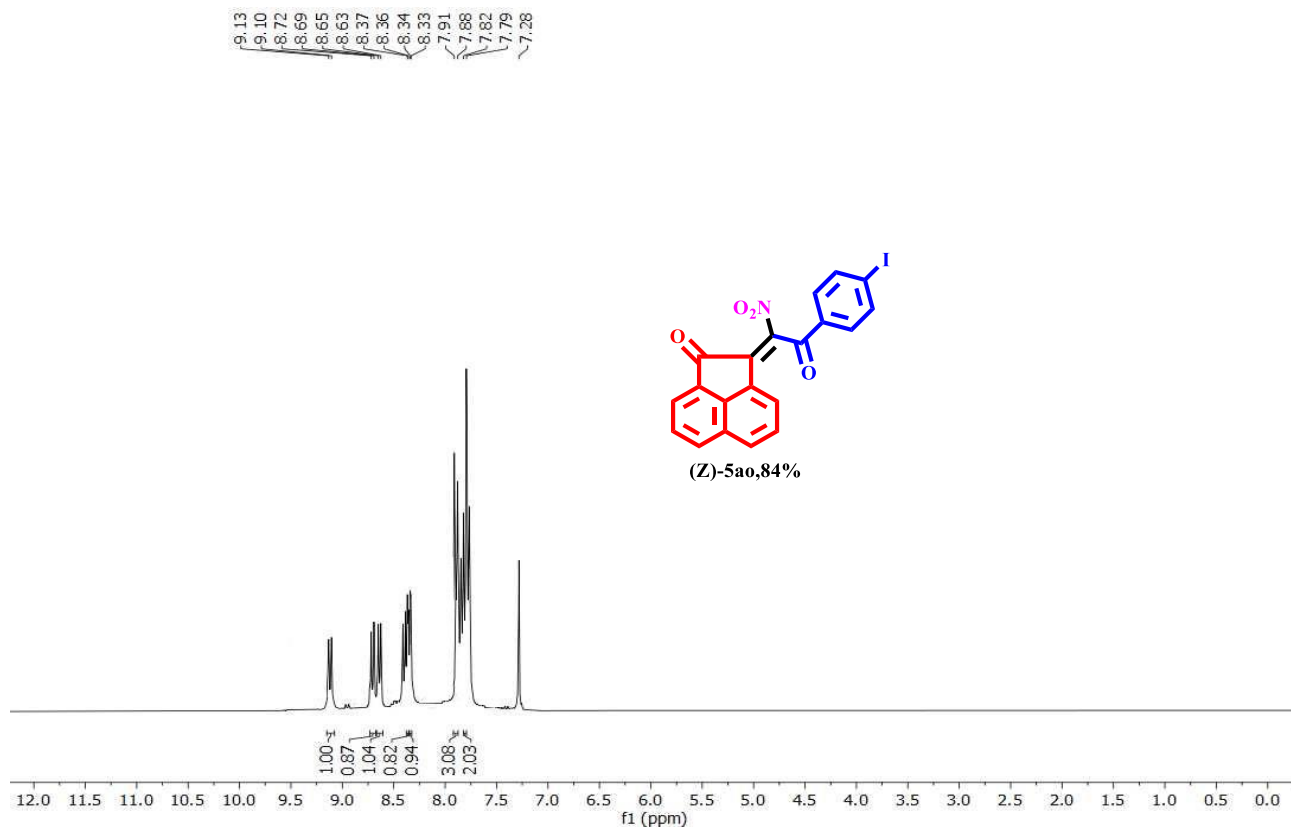

**<sup>1</sup>H NMR Spectrum of (Z)-5ao**

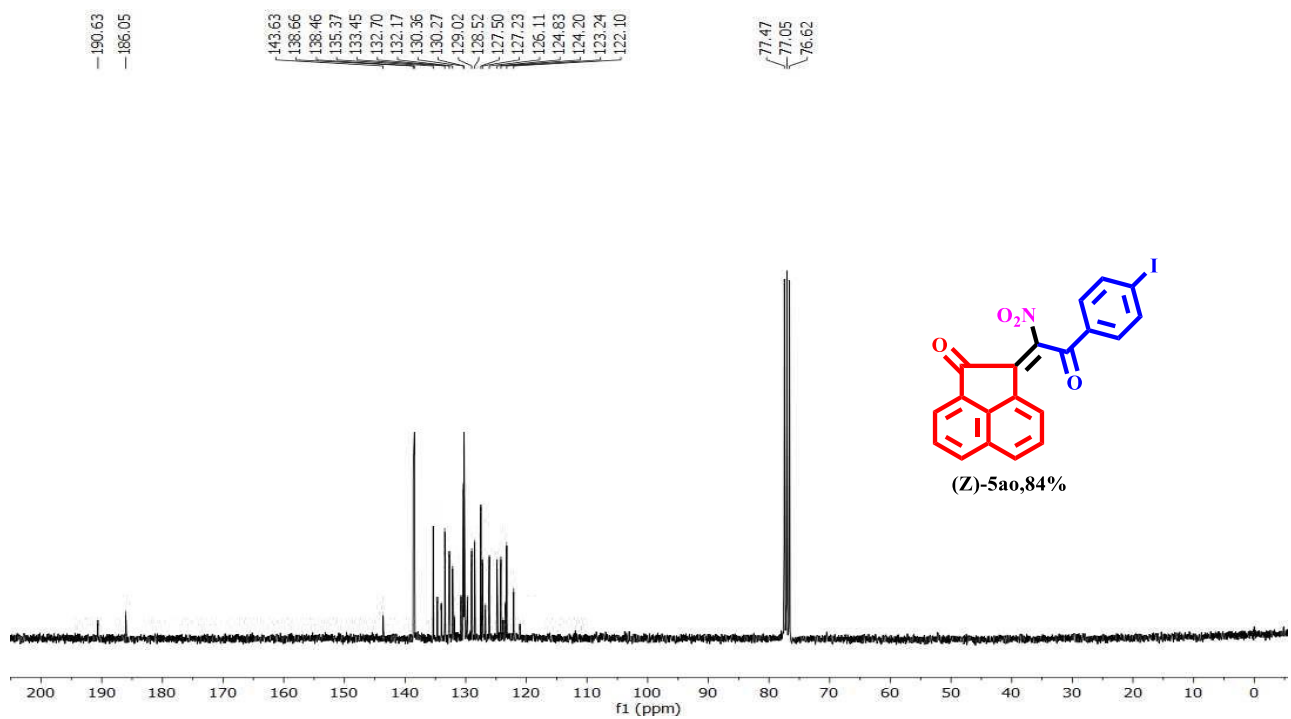

**<sup>13</sup>C NMR Spectrum of (Z)-5ao**



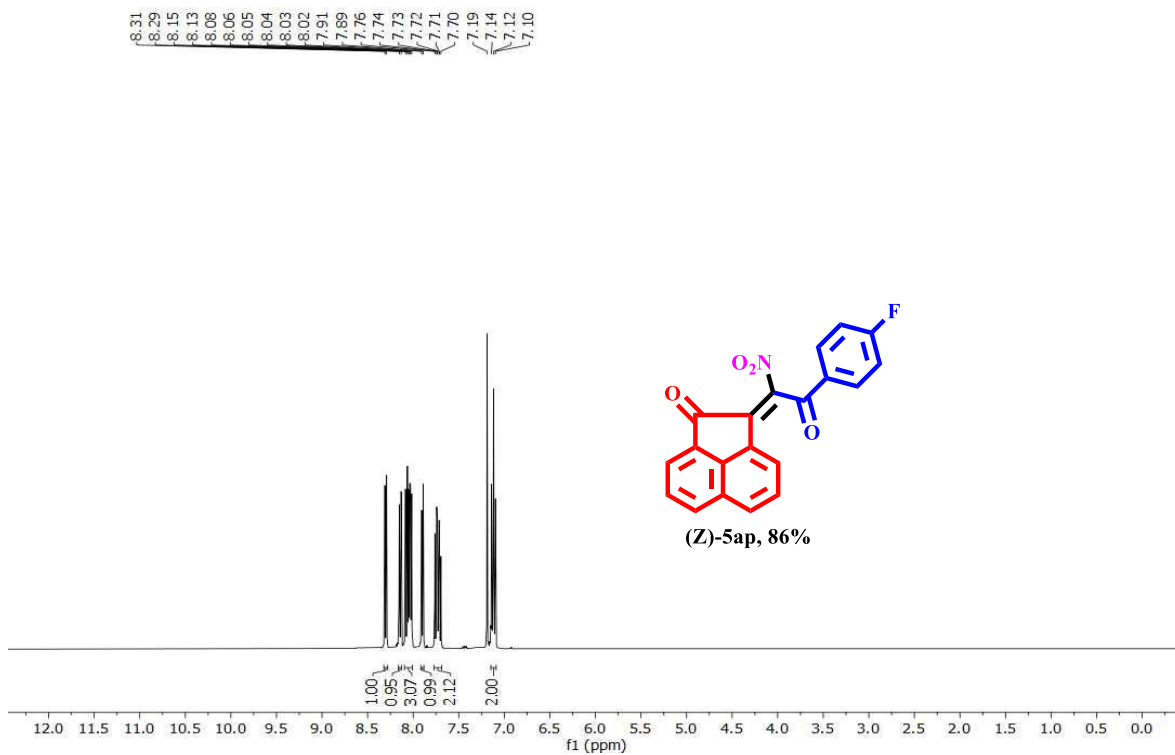

**<sup>1</sup>H NMR Spectrum of (Z)-5ap**

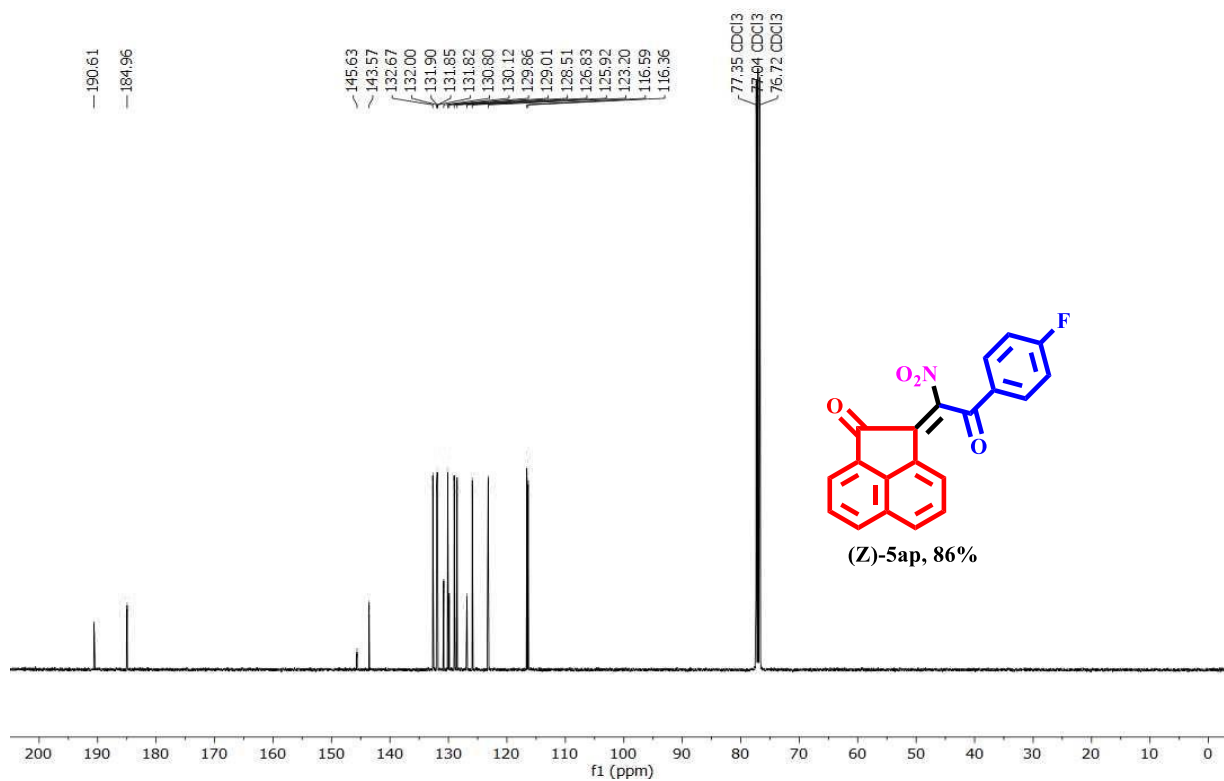

**<sup>13</sup>C NMR Spectrum of (Z)-5ap**

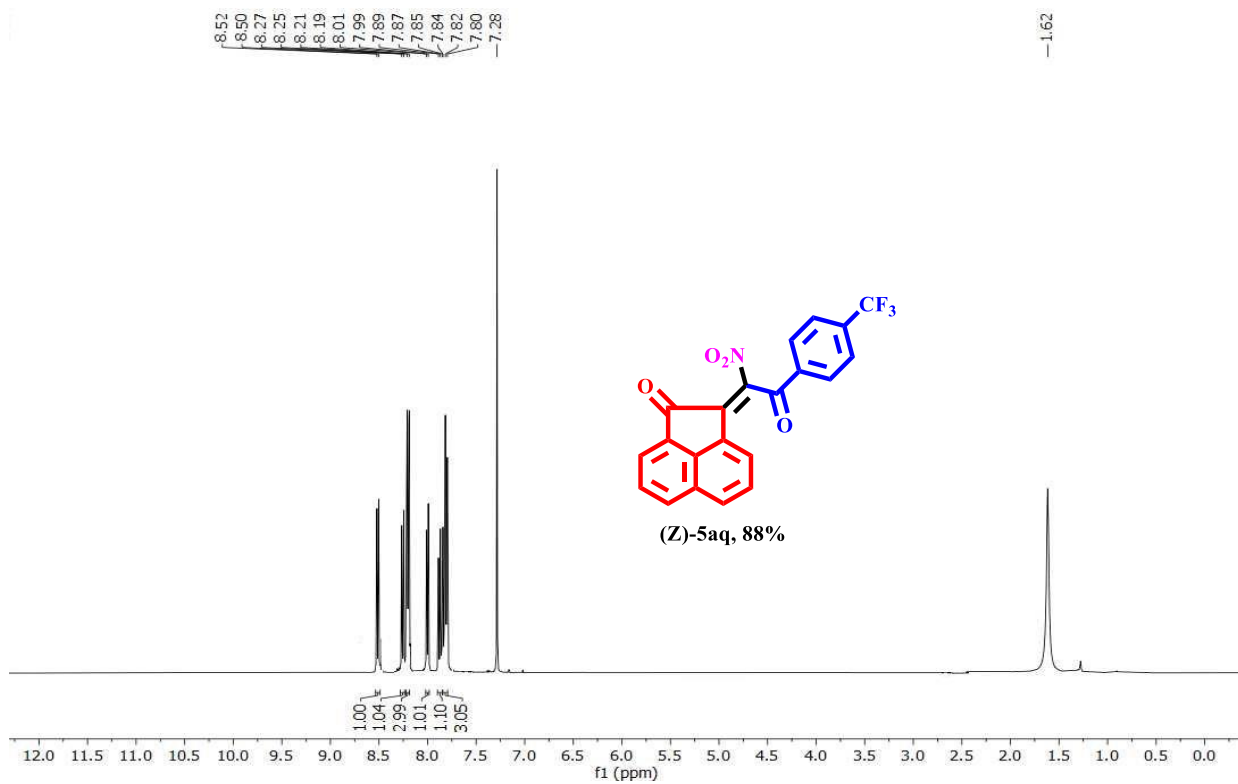

**<sup>1</sup>H NMR Spectrum of (Z)-5aq**

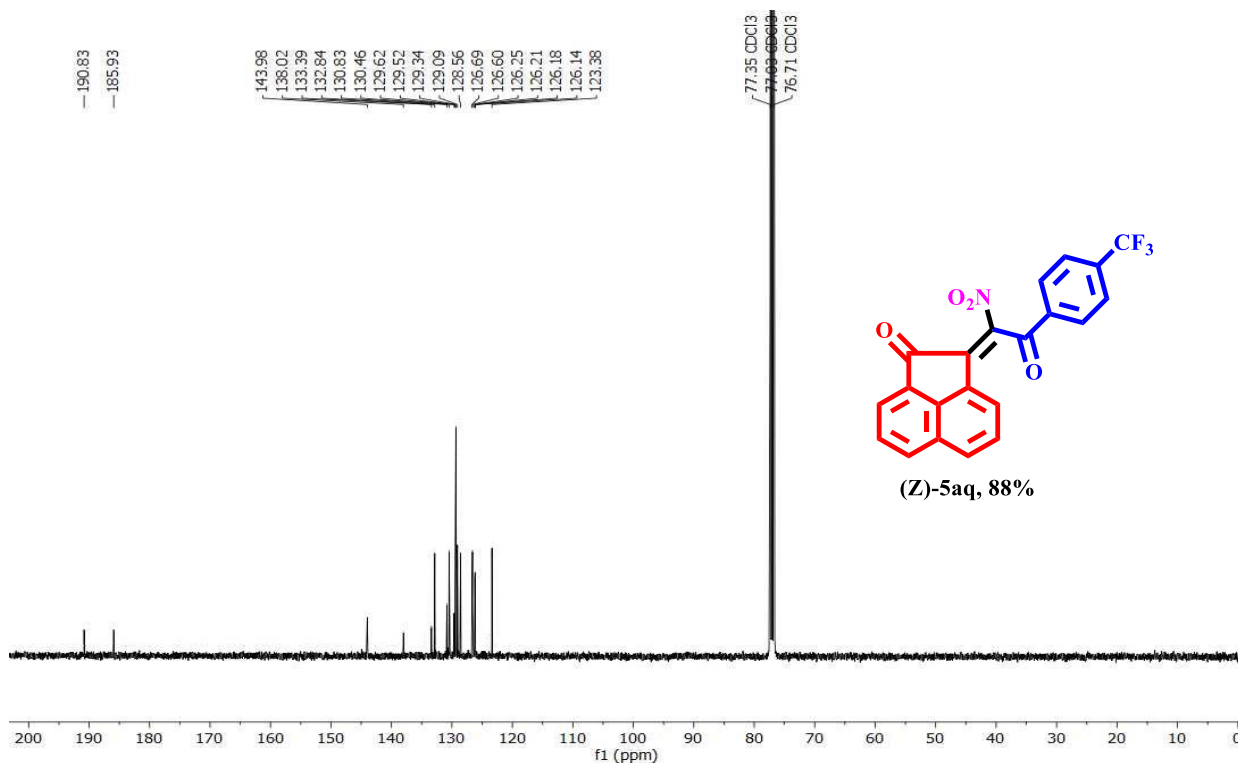

**<sup>13</sup>C NMR Spectrum of (Z)-5aq**

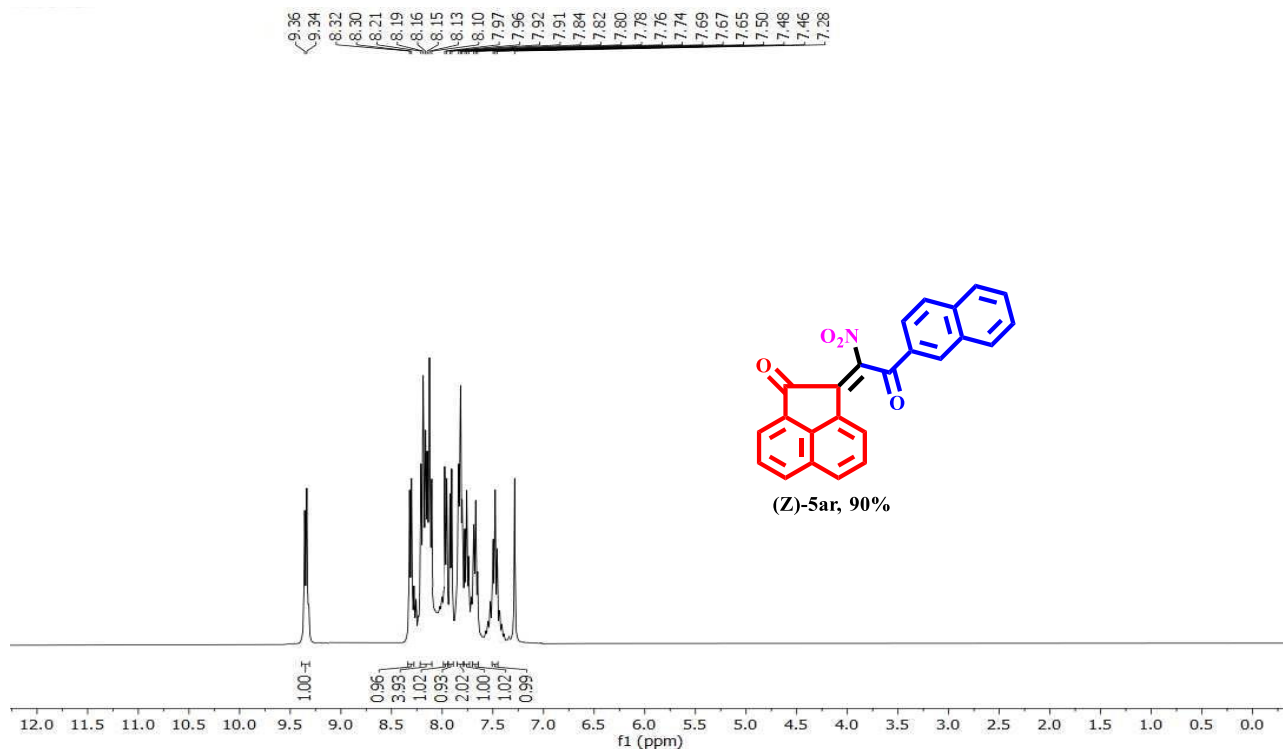

**<sup>1</sup>H NMR Spectrum of (Z)-5ar**

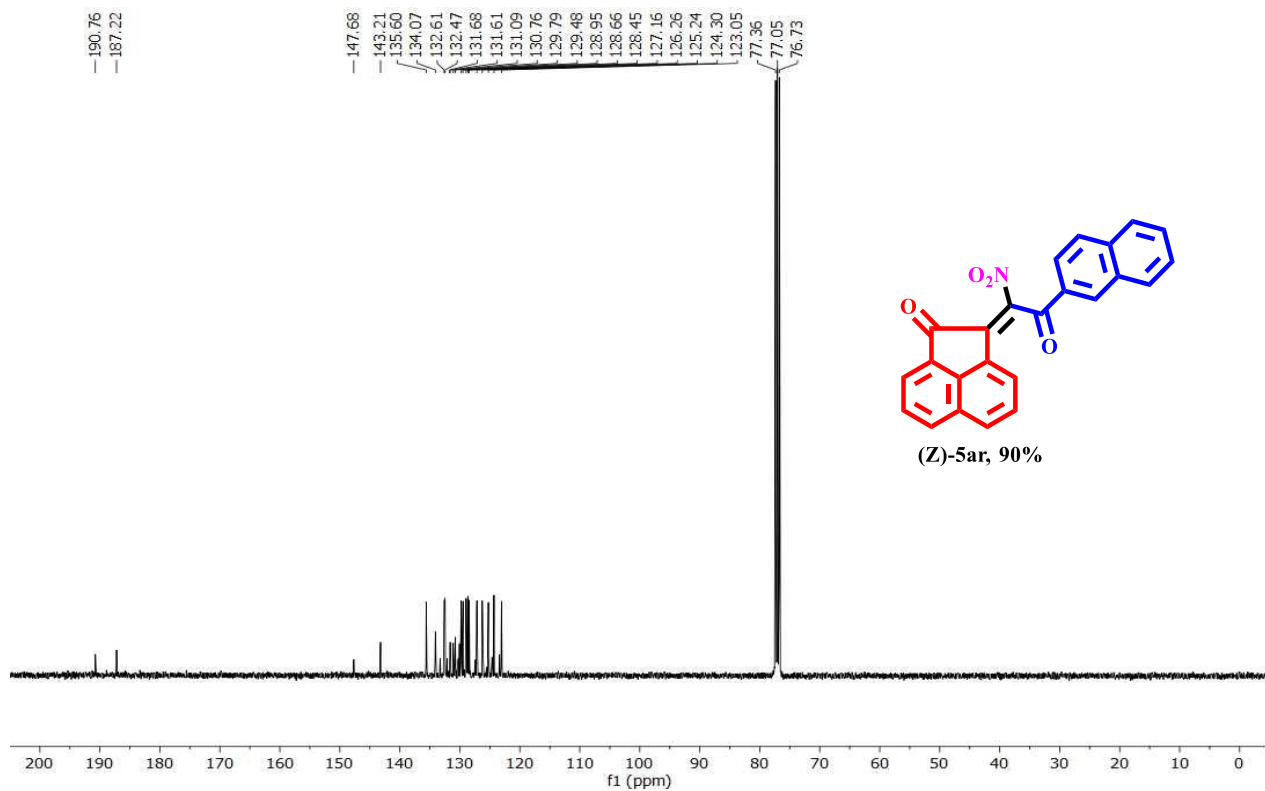

**<sup>13</sup>C NMR Spectrum of (Z)-5ar**

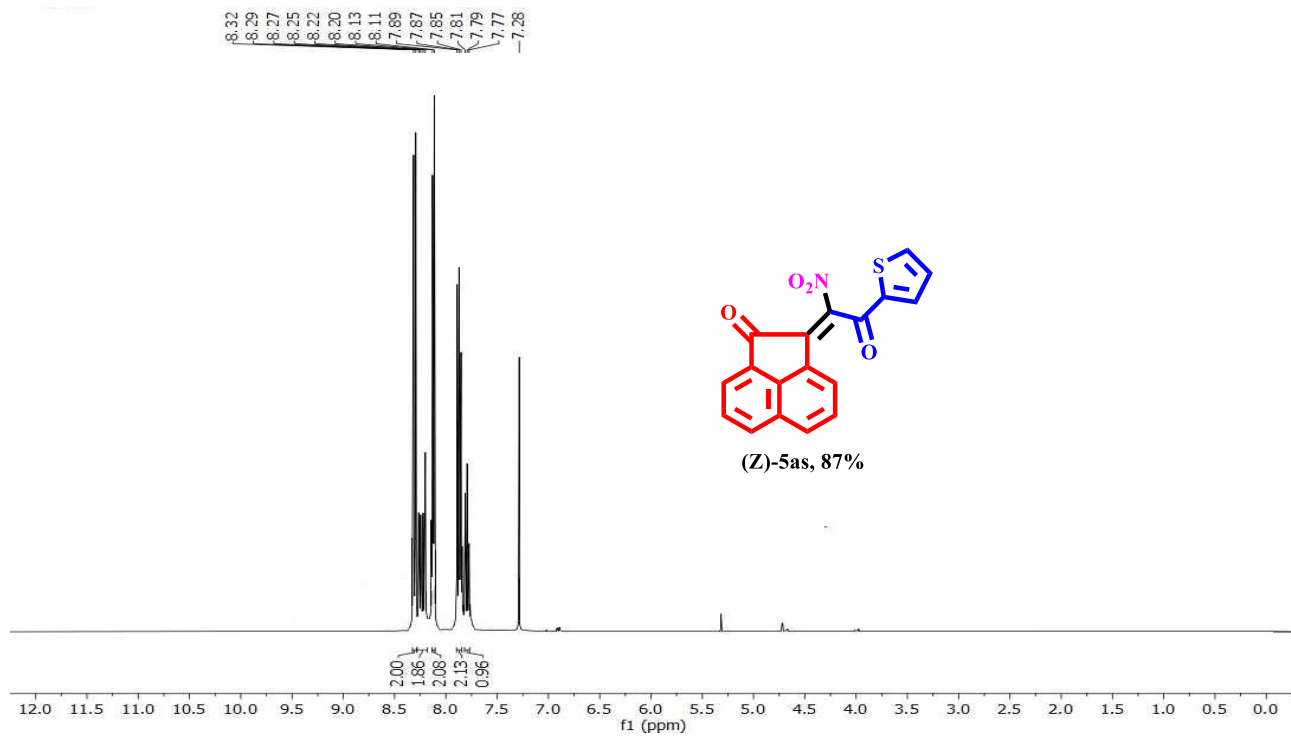

**<sup>1</sup>H NMR Spectrum of (Z)-5as**

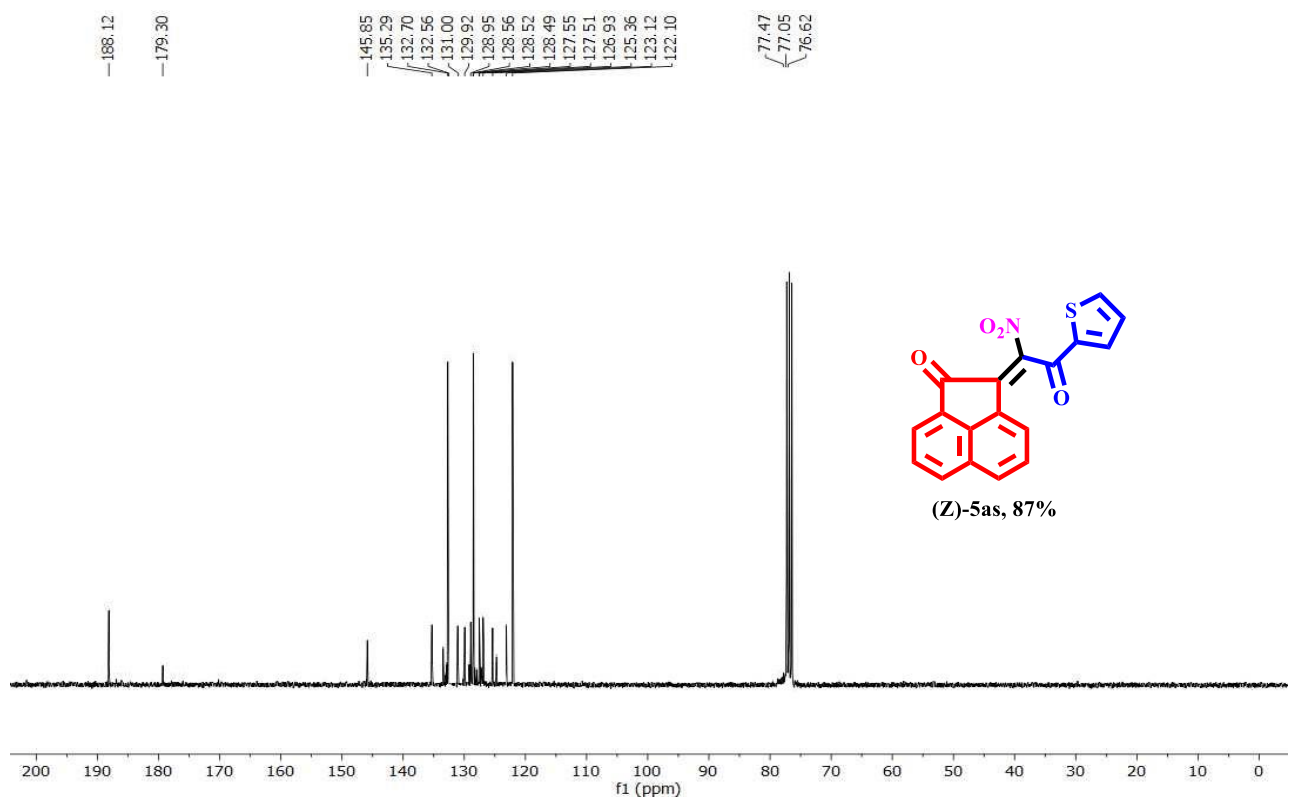

**<sup>13</sup>C NMR Spectrum of (Z)-5as**

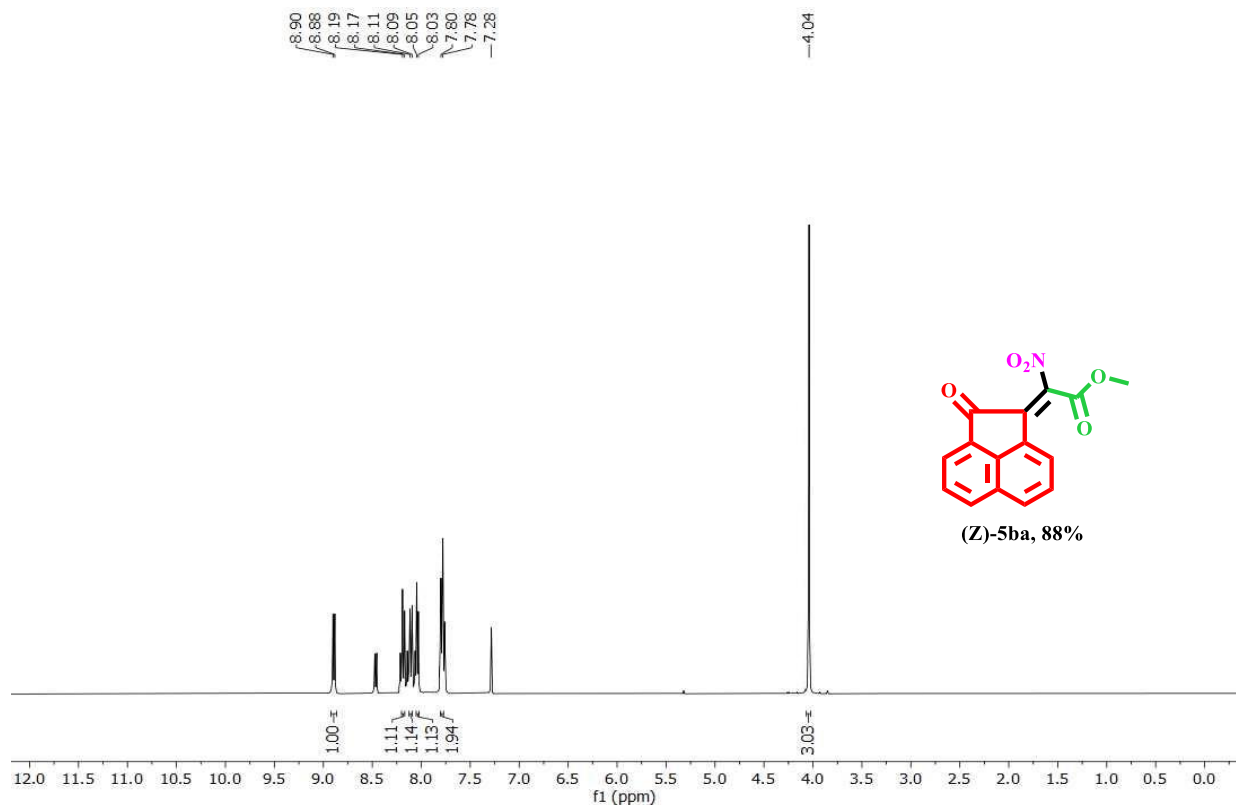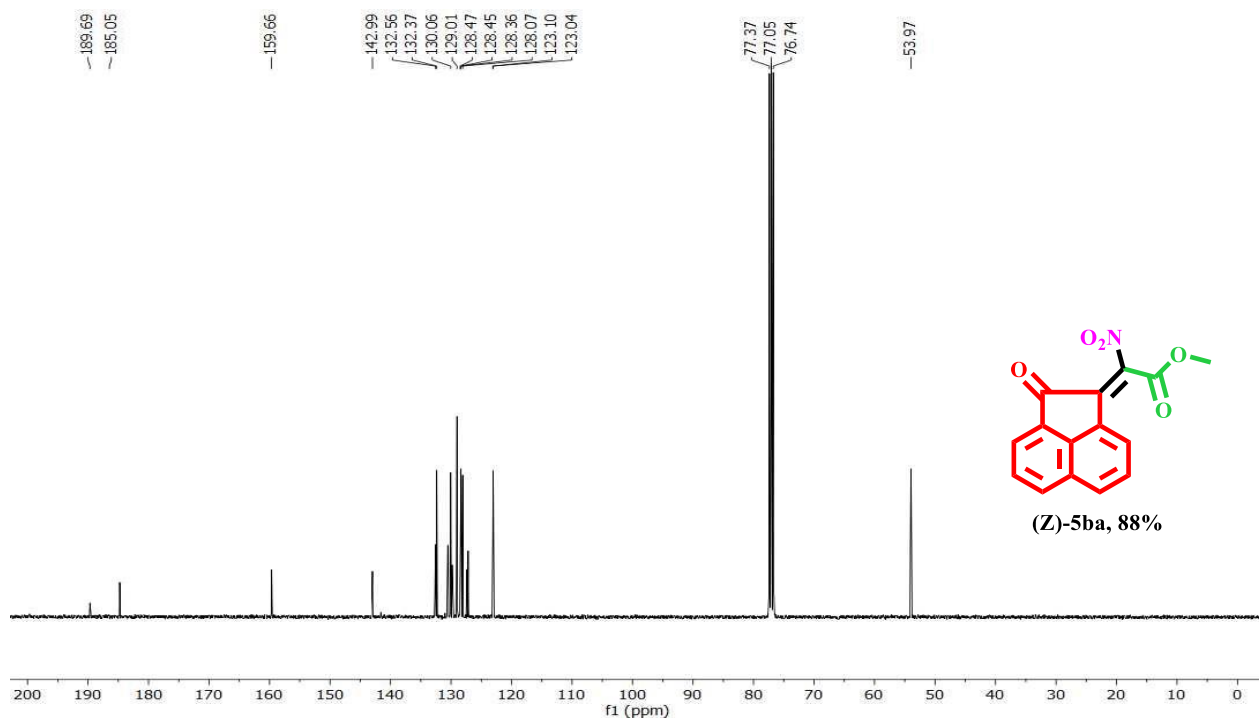

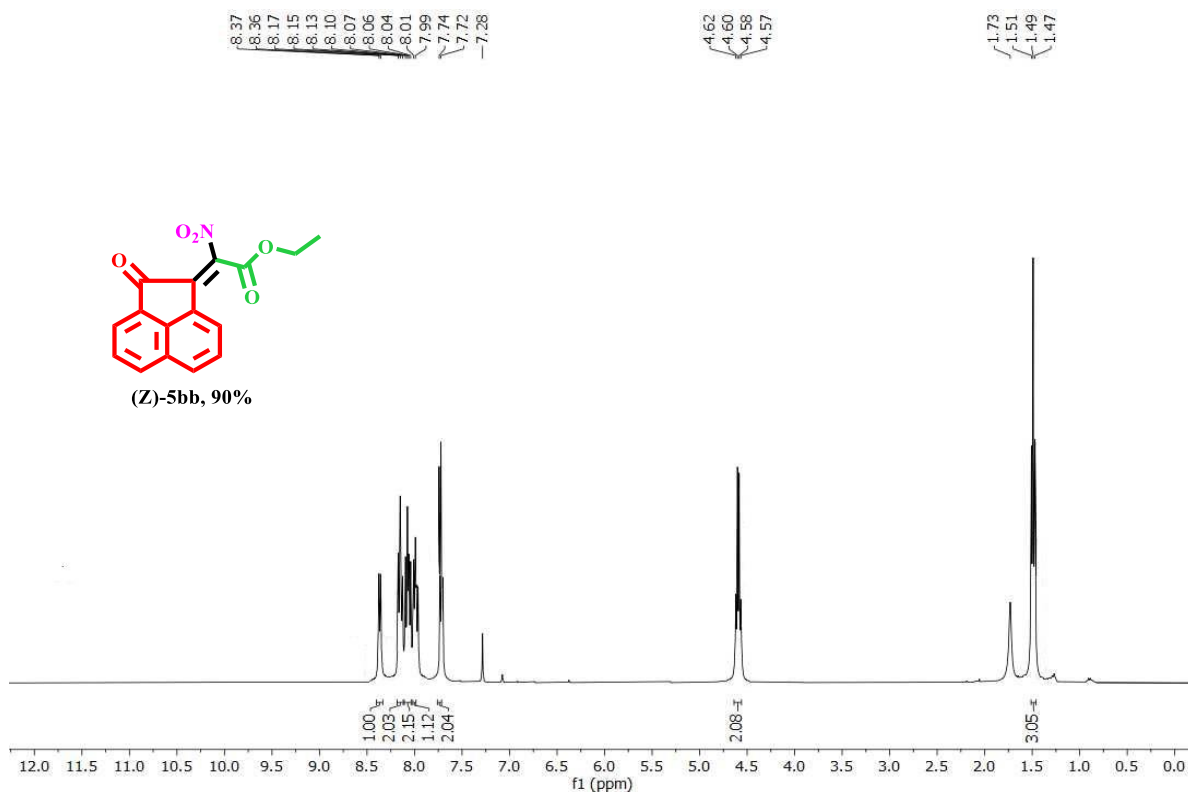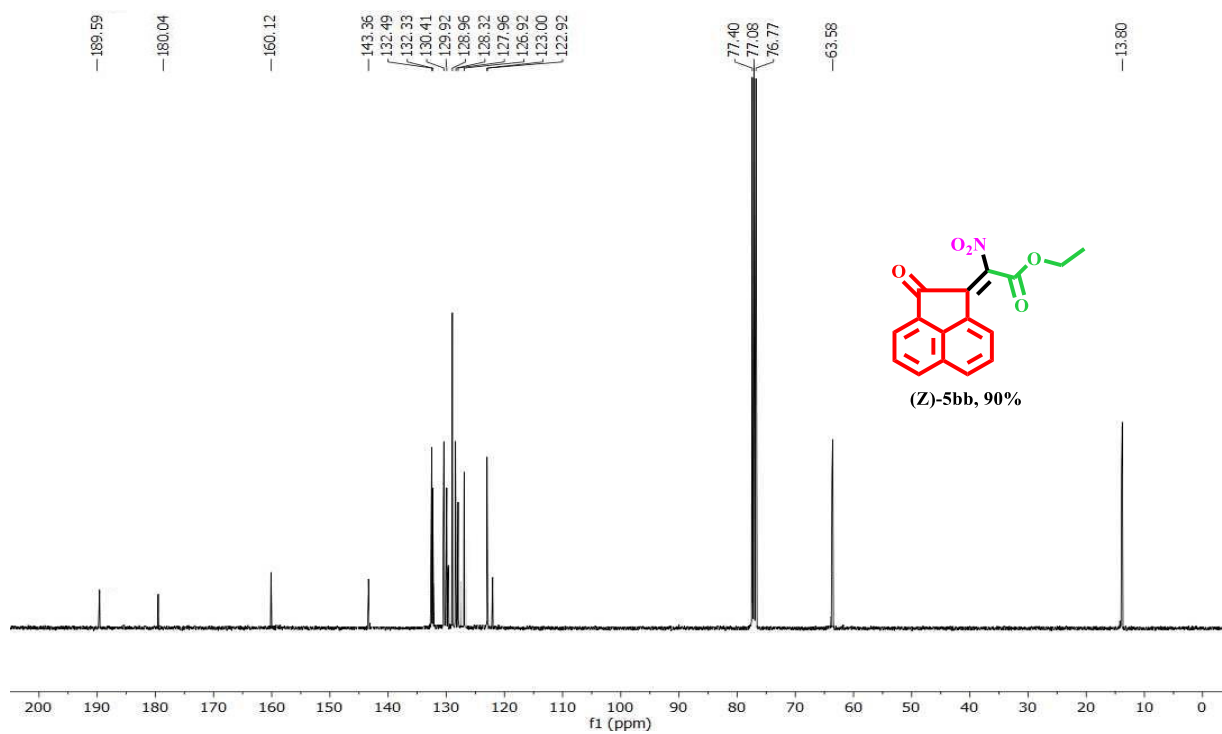

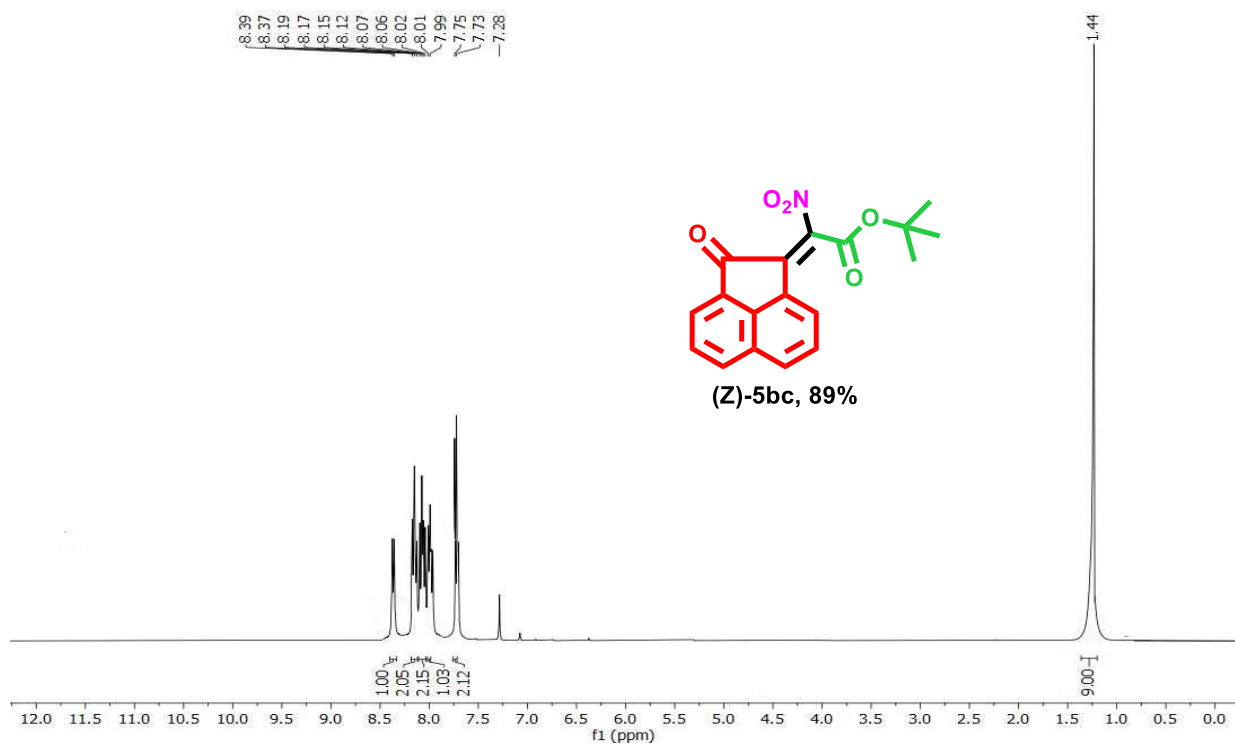

<sup>1</sup>H NMR Spectrum of (Z)-5bc

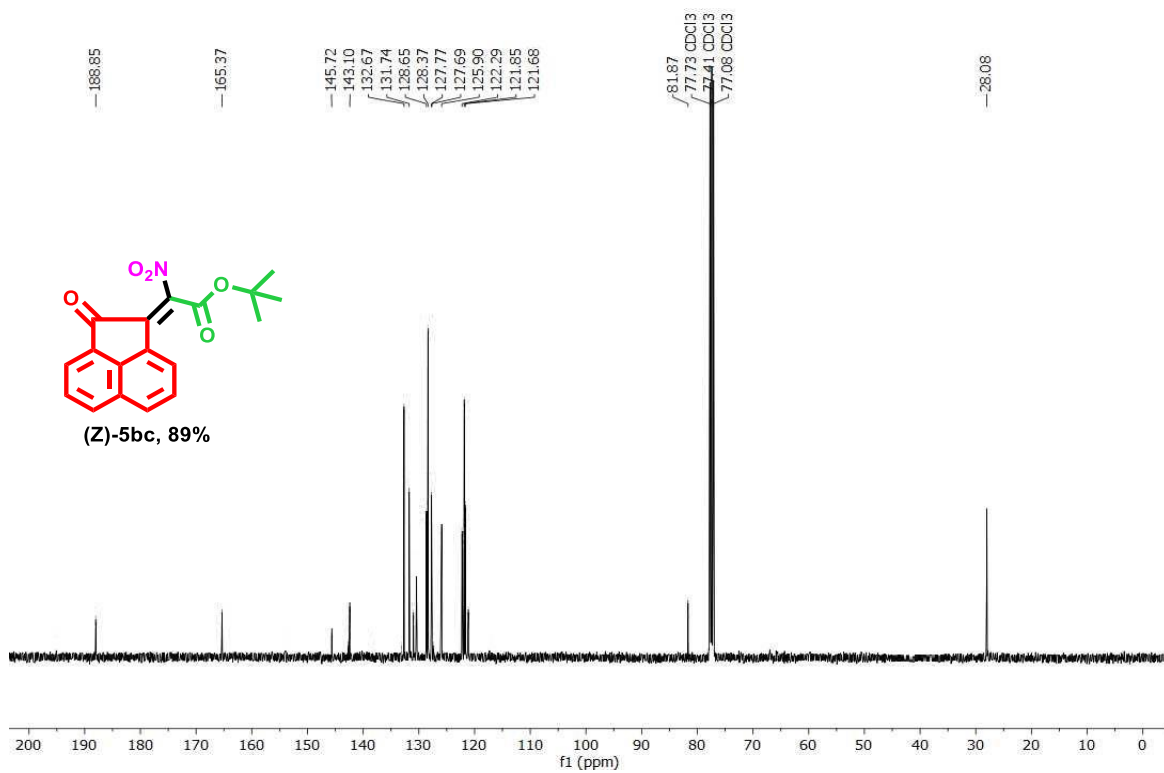

<sup>13</sup>C NMR Spectrum of (Z)-5bc

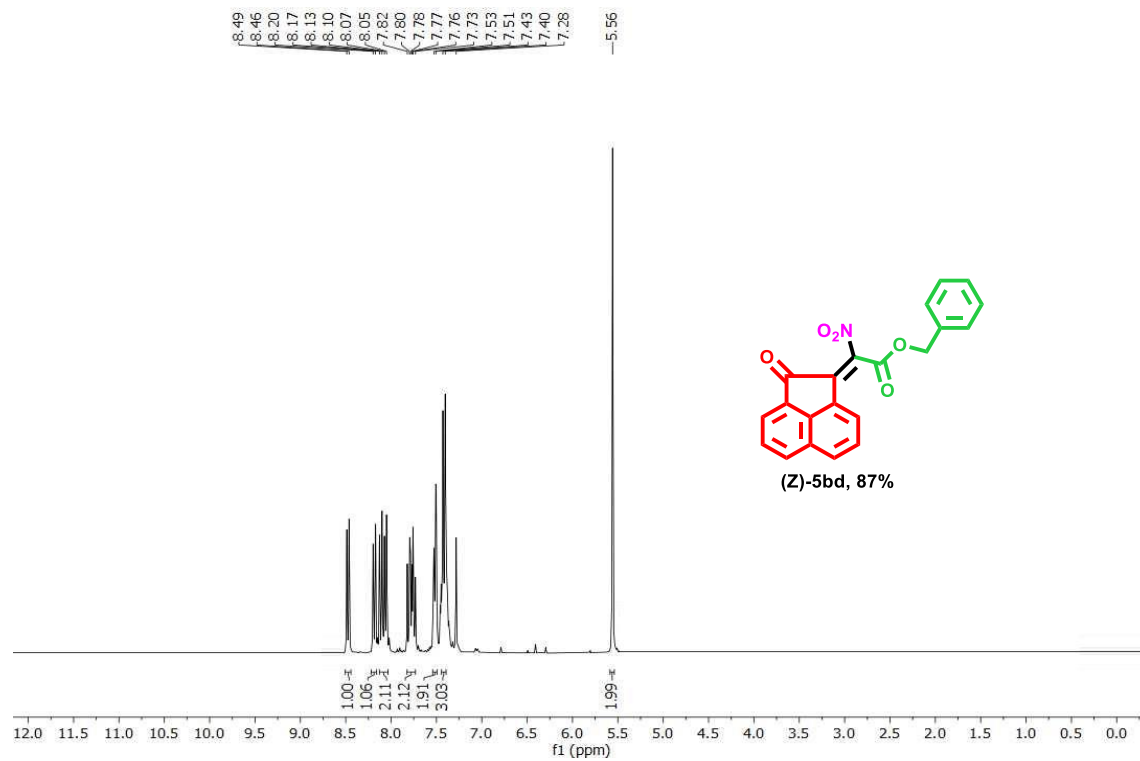

**<sup>1</sup>H NMR Spectrum of (Z)-5bd**

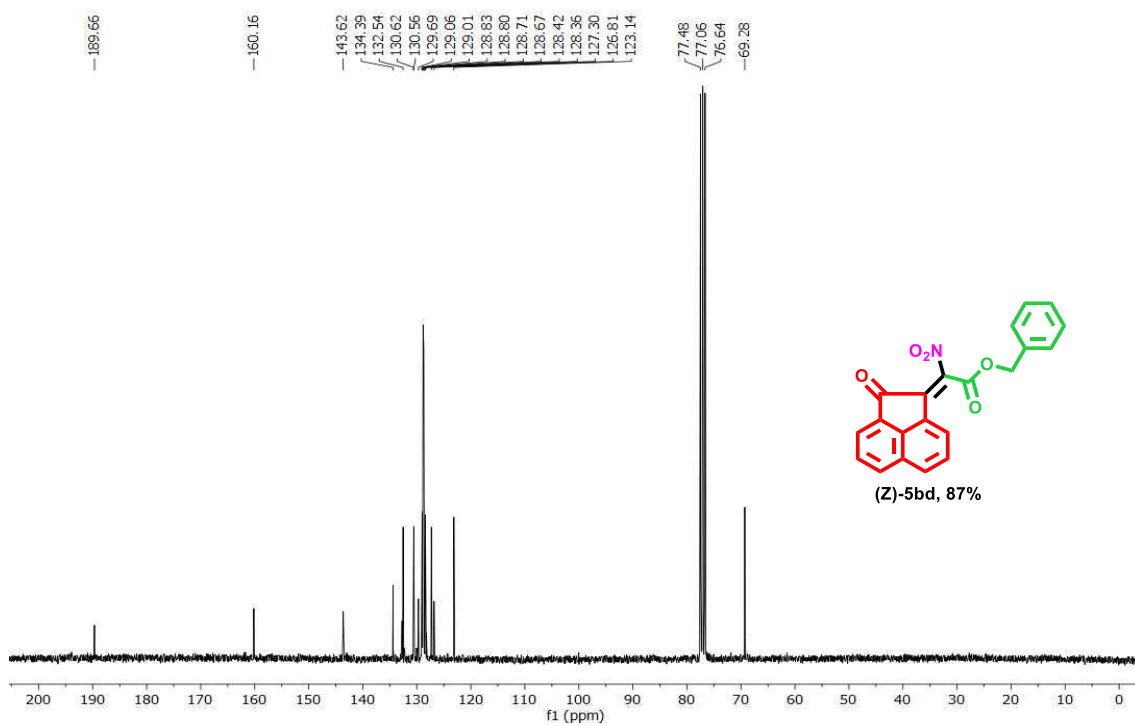

**<sup>13</sup>C NMR Spectrum of (Z)-5bd**



# Mass spectrum of the crude reaction mixture

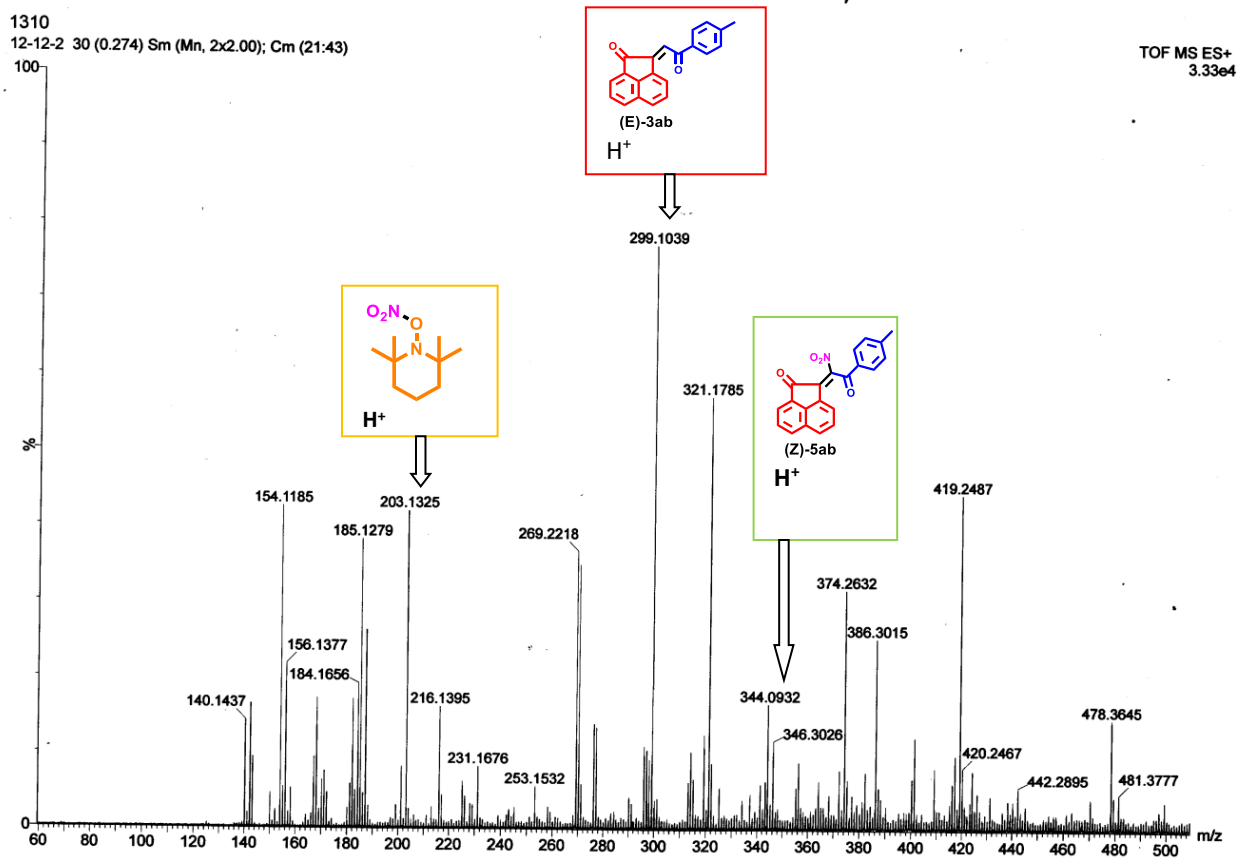

### Experiment to prove the geometry of the synthesized compound (**Z**)-**5ab** :

Initially we took 1.1 equiv. of (**Z**)-**5ab** in a dry 10 ml round bottomed flask in dry  $\text{CH}_2\text{Cl}_2$  (5 ml) in presence of 1 equiv. of anhydrous  $\text{AlCl}_3$ . After 48 hours the reaction was quenched in an aqueous solution of saturated  $\text{NaHCO}_3$ , extracted with  $\text{CH}_2\text{Cl}_2$  and the column chromatography was performed to obtain both the diastereomer of **5ab** in the ratio of 80:20 yield. This is due to the fact that the 2 carbonyl group must have to lie in the same side in order to form chelation with 1.1 equiv. of  $\text{AlCl}_3$ . From the  $^1\text{H}$  NMR spectrum of both the diastereomer we have found out that the NMR spectrum of major diastereomer is different from the  $^1\text{H}$  NMR spectrum of pre- $\text{AlCl}_3$  addition compound i.e; (**Z**)-**5ab**. The  $\text{H}_a$  proton of the major diastereomer ( $\delta$  8.56 ppm) is more deshielded than (**Z**)-**5ab**. This fact indicates that the major diastereomer is in (**E**) configuration. The  $\text{H}_a$  proton of (**E**) diastereomer is more deshielded compare to the (**Z**) diastereomer because the higher paramagnetic deshielding effect of  $\text{NO}_2$  group.

On the other hand the minor one has exactly the same  $^1\text{H}$  NMR spectrum as (**Z**)-**5ab** which implies the minor diastereomer is in (**Z**) configuration. Therefore the starting **5ab** has the (**Z**) configuration.

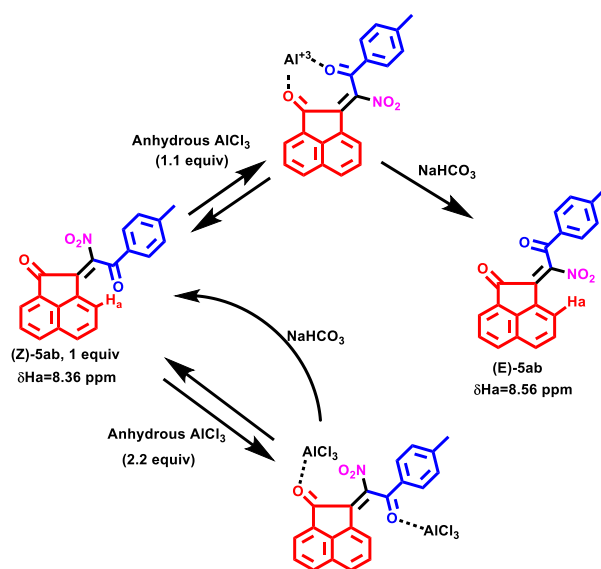

<sup>a</sup>**Reaction conditions:** 1) (**Z**)-**5ab** (1 equiv.) and anhydrous  $\text{AlCl}_3$  (1.1equiv.) in dry  $\text{CH}_2\text{Cl}_2$  (5 ml) at room temperature (25-30 °C) for 48 hours. 2) (**Z**)-**5ab** (1 equiv.) and anhydrous  $\text{AlCl}_3$  (2.2 equiv.) in dry  $\text{CH}_2\text{Cl}_2$  (5 ml) at room temperature (25-30 °C) for 48 hours.

If the same reaction was performed in presence of 2.2 equiv. of anhydrous  $\text{AlCl}_3$  instead of 1.1 equiv. of  $\text{AlCl}_3$ , we obtained (**Z**)-**5ab** as the major diastereomer which was concluded from the  $^1\text{H}$  NMR spectrum of the final compound. From

this experiment we can conclude that the geometry of our final product 5ab is (Z).

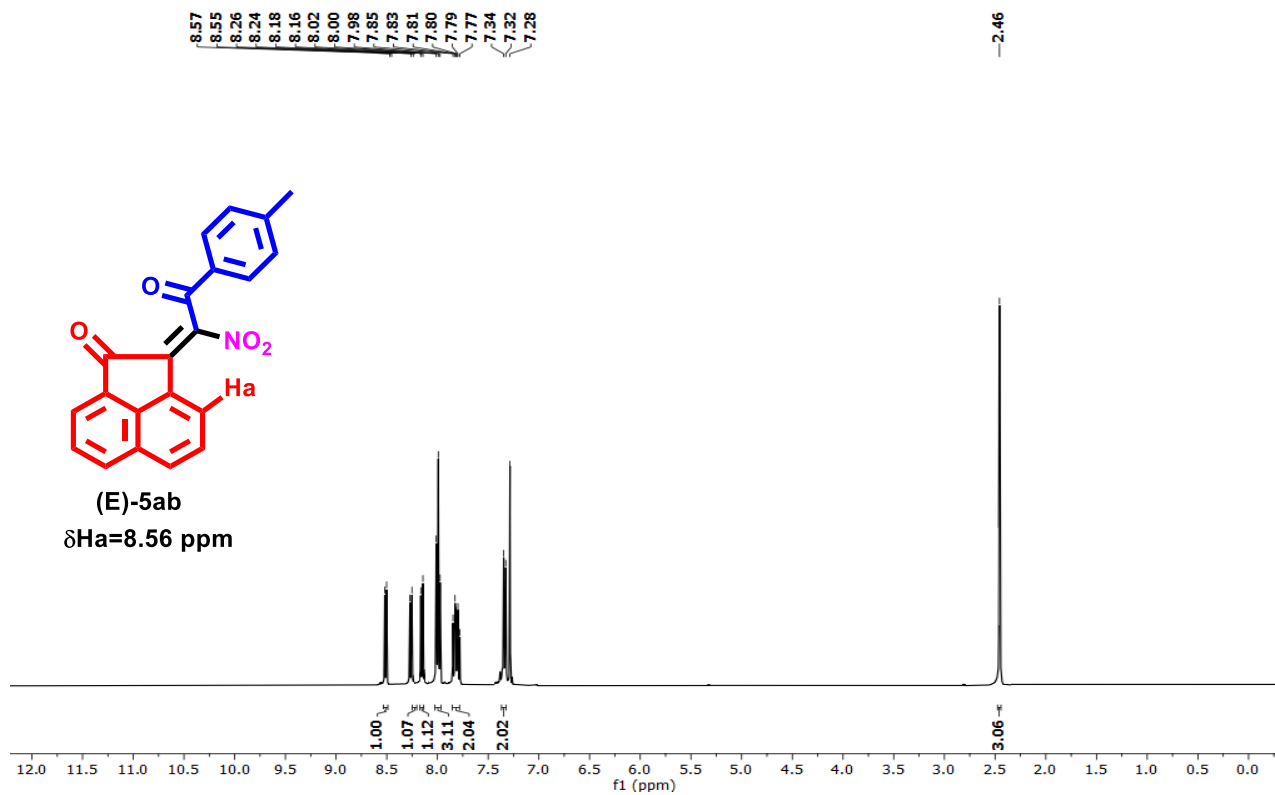

**<sup>1</sup>H NMR spectrum of (E)-5ab**

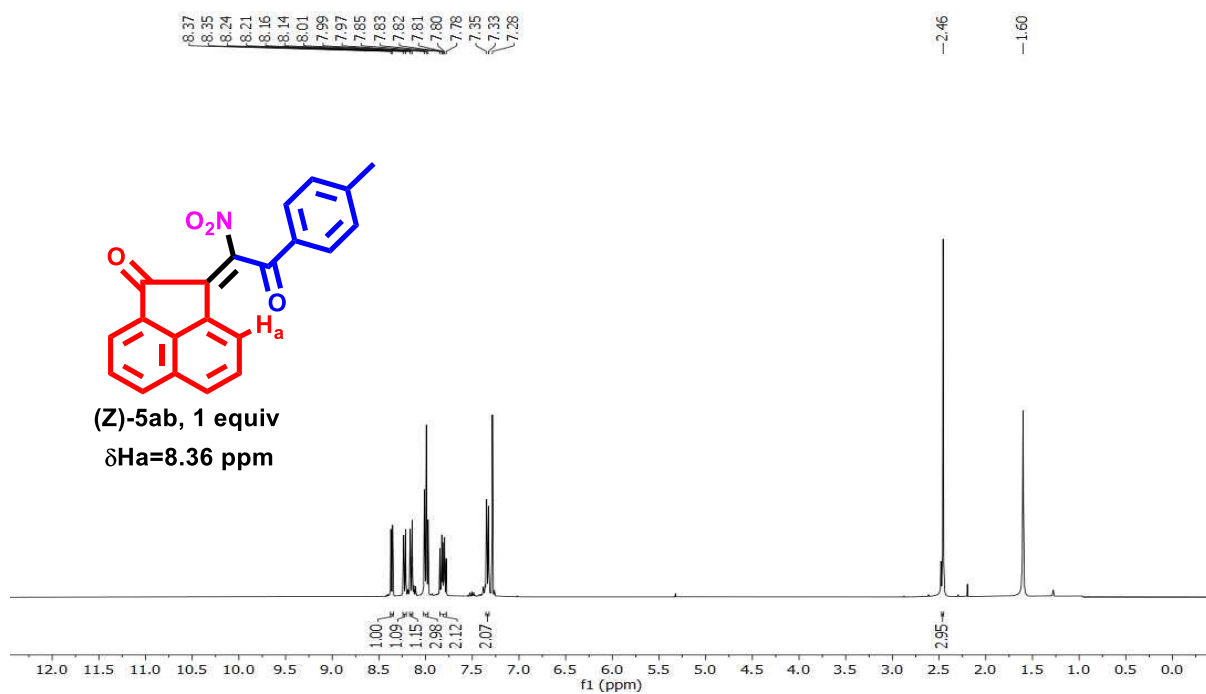

**<sup>1</sup>H NMR spectrum of (Z)-5ab**

Also we have done same experiment with (Z)-5aa and we have observed the changes in  $\delta$  value of H<sub>a</sub> proton of final product (E)-5aa and the experimental <sup>1</sup>H NMR data has been given in.

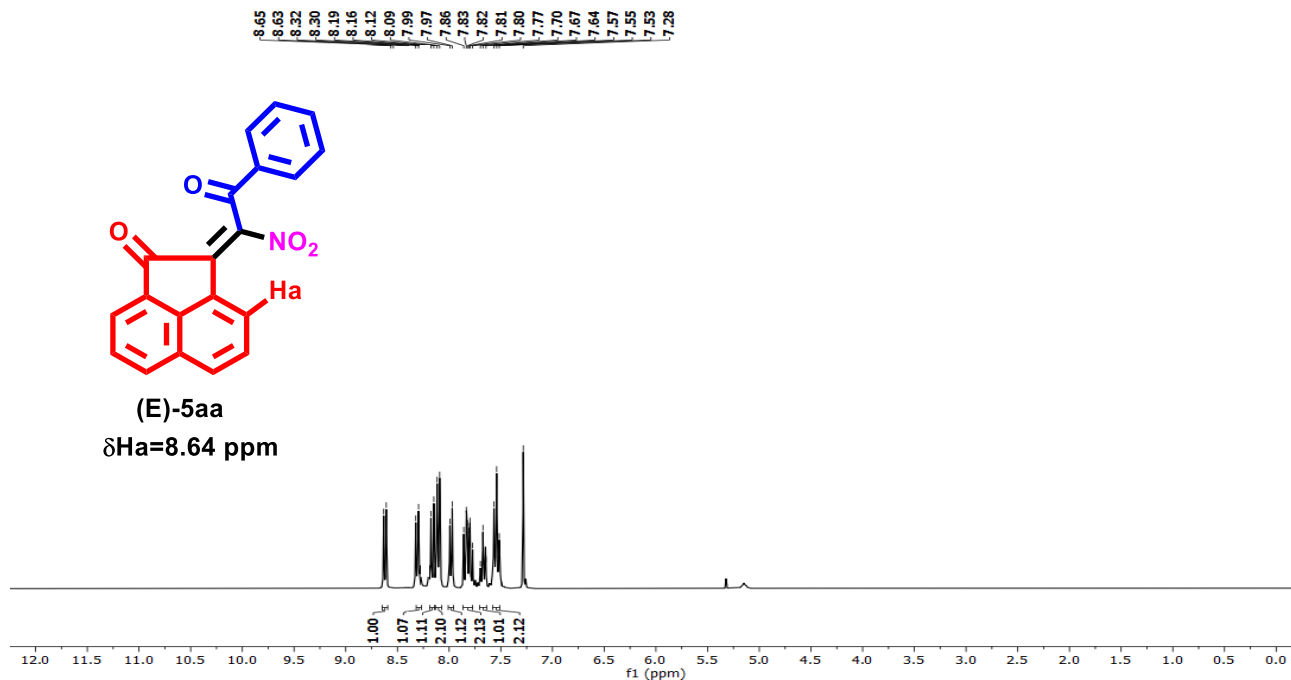

**<sup>1</sup>H NMR spectrum of (E)-5aa**

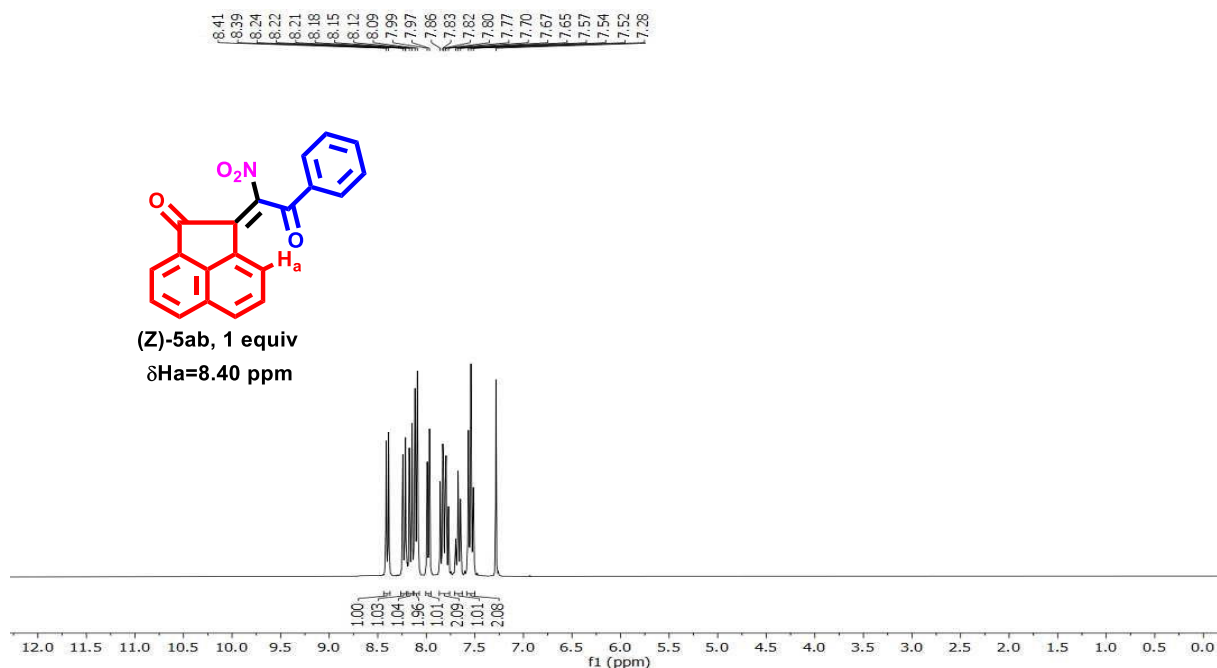

**<sup>1</sup>H NMR spectrum of (Z)-5aa**

## HSQC of compound 3ai and 5ai

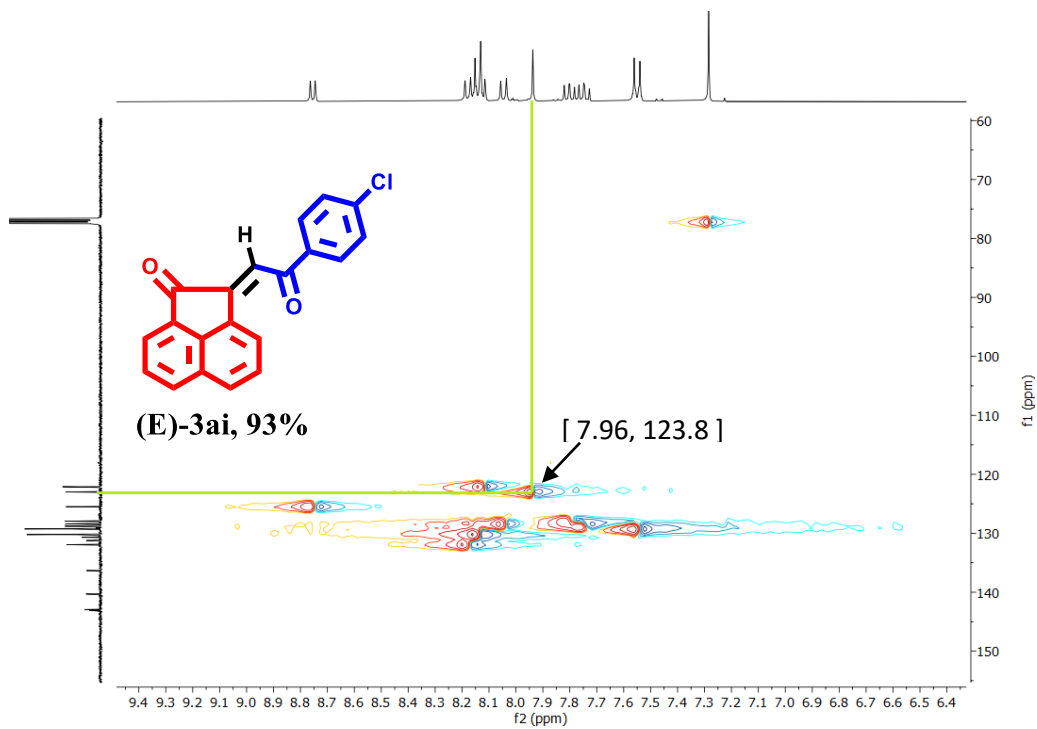

## HSQC of compound 3ai

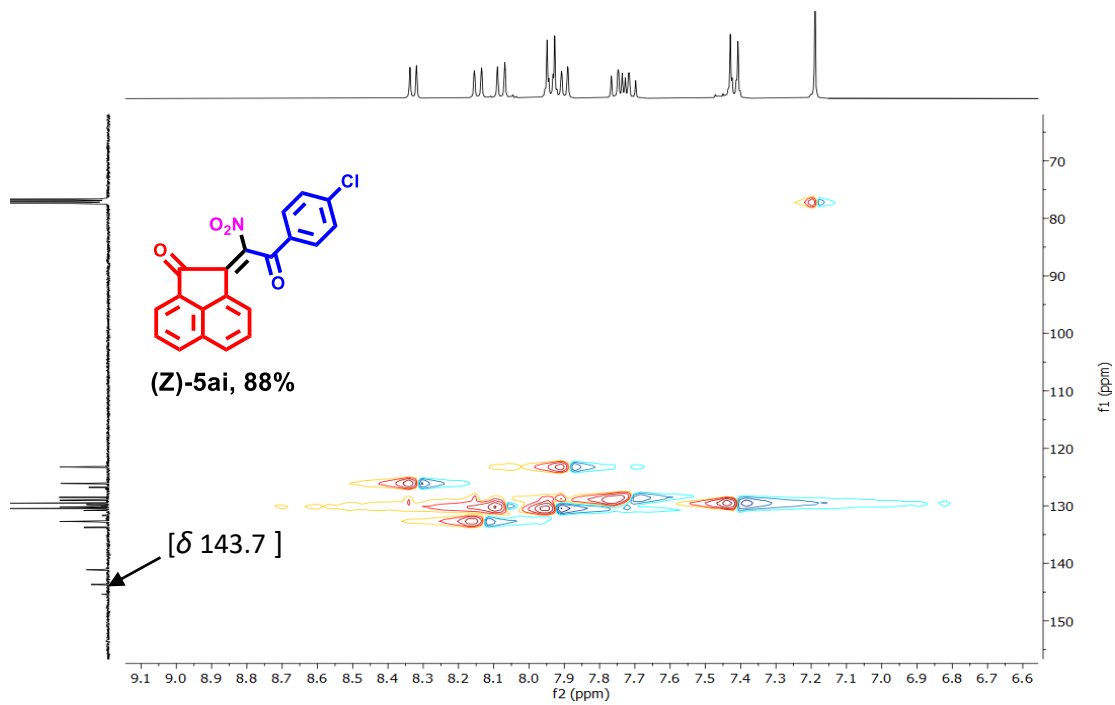

## HSQC of compound 5ai

**Figure 3** represents the 400 MHz HSQC spectra of (E)-3ai and (E)-5ai. The molecule (E)-3ai exhibits a two-bond correlation between its proton and carbon (shown in oval shape) and indicated by the peak ( $\delta$  7.96, 123.8). However, in (E)-5ai, this bond correlation is absent, indicating that the proton that was present in the preceding compound has disappeared. On the other hand, the ipso carbon containing the NO<sub>2</sub> has appeared at  $\delta$  143.7.

**Table 1 : Optimization of reaction condition**

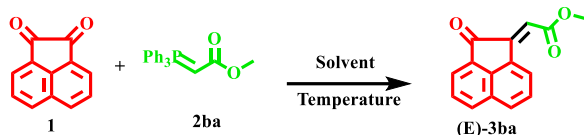

| Entry     | Solvent          | Temperature (°C) | Yield(%) <sup>b</sup> |
|-----------|------------------|------------------|-----------------------|
| 1.        | Neat             | r.t (25)         | nr                    |
| 2.        | PEG 400          | r.t (25)         | nr                    |
| 3.        | PEG 400          | 80               | 70                    |
| <b>4.</b> | <b>PEG 400</b>   | <b>110</b>       | <b>92</b>             |
| 5.        | PEG 400          | 110              | 92 <sup>c</sup>       |
| <b>6.</b> | H <sub>2</sub> O | 110              | nr                    |
| 7.        | EtOH             | 110              | 20                    |
| 8.        | MeOH             | 110              | 18                    |
| 9.        | THF              | 110              | 22                    |
| 10.       | 1,4 dioxane      | 110              | 25                    |
| 11.       | DCM              | 110              | 14                    |
| 12.       | DMSO             | 110              | 21                    |

<sup>a</sup>Reaction condition : A mixture of acenaphthylene 1,2-dione **1**(1mmol) and **2ba** (1 mmol) was reacted in various solvent (1 ml) at different temperature for 2.5 hour. <sup>b</sup>Yield after column purification. <sup>c</sup>Reaction mixture was run for 5 hours.

We examined the following reaction with different solvent at different temperature but it seems that PEG 400 at 110 °C is best suitable to obtain the desired products (**Table 1**).

## Analysis of green chemistry metrics

The following equations have been used for calculating Effective Mass Yield (EMY), Atom Economy (AE), Carbon Efficiency (CE), Reaction Mass Efficiency (RME) and E-factor. Calculated data for compound 3aa ,3ba ,5aa and 5ba have been shown in **Table X**.

$$\text{EMY (\%)} = \frac{\text{Mass of the product}}{\text{Mass of the nonbenign reagents}} \times 100$$

$$\text{AE (\%)} = \frac{\text{Molecular weight of the product}}{\text{Total molecular weight of the reactants}} \times 100$$

$$\text{CE (\%)} = \frac{\text{Amount of carbon in the product}}{\text{Total carbon present in the reactants}} \times 100$$

$$\text{RME (\%)} = \frac{\text{Mass of the isolated product}}{\text{Total mass of the reactants}} \times 100$$

$$\text{E-factor (g/g)} = \frac{\text{Total mass of wastes}}{\text{Mass of the product}} = \frac{(\text{Mass of raw materials} - \text{mass of product})}{\text{Mass of the the product}}$$

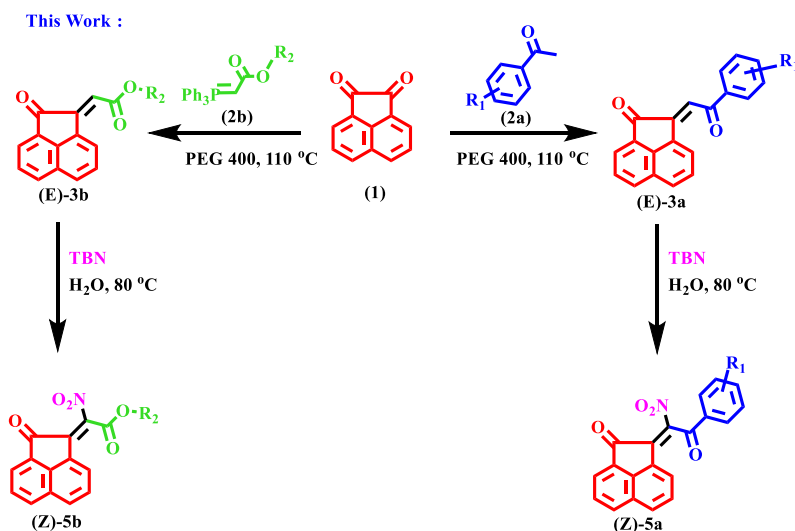



| Reactants                                                                                      | Amount used for reaction (g) (1.00 mmol) | Molecular weight (MW) | No of C-atom present in reactant |
|------------------------------------------------------------------------------------------------|------------------------------------------|-----------------------|----------------------------------|
| 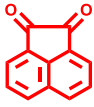<br>(1)       | 0.182                                    | 182.0368              | 12                               |
| <br>(2aa)     | 0.120                                    | 120.0575              | 8                                |
| <br>(2ba)     | 0.348                                    | 348.1279              | 22                               |
| <i>t</i> -BuONO<br>(4)                                                                         | 0.103                                    | 103.0633              | 4                                |
| <br>(E)-3aa   | 0.284                                    | 284.0837              | 20                               |
| <br>(E)-3ba | 0.238                                    | 238.0630              | 15                               |

**Materials and their respective amount used for metrics calculations :**

| Product | Molecular weight (MW) | Yield (%) | Amount of product (g) | No of C-atom present in product | Mole no of product |
|---------|-----------------------|-----------|-----------------------|---------------------------------|--------------------|
| 3aa     | 284.0837              | 95        | 0.270                 | 20                              | 0.0009504241179    |
| 3ba     | 238.0630              | 92        | 0.219                 | 15                              | 0.0009199245577    |
| 5aa     | 329.0688              | 86        | 0.283                 | 20                              | 0.0008600025283    |
| 5ba     | 283.0481              | 88        | 0.249                 | 15                              | 0.0008797091377    |

Representative calculations of green metrics for (E)-2-(2-oxo-2-phenylethylidene)acenaphthylen-1(2H)-one derivative (**3aa**):

$$\text{EMY (\%)} = \frac{\text{Mass of the product}}{\text{Mass of the nonbenign reagents}} \times 100 = \frac{0.270}{0.182 + 0.120} \times 100 = 89.40\%$$

$$\text{AE (\%)} = \frac{\text{Molecular weight of the product}}{\text{Total molecular weight of the reactants}} \times 100 = \frac{284.0837}{182.0368 + 120.0575} \times 100 = 94.03\%$$

$$\text{CE (\%)} = \frac{\text{Amount of carbon in the product}}{\text{Total carbon present in the reactants}} \times 100 = \frac{(0.0009504241179 \times 20)}{(0.001 \times 12) + (0.001 \times 8)} \times 100 = 95.04\%$$

$$\text{RME(\%)} = \frac{\text{Mass of the isolated product}}{\text{Total mass of the reactants}} \times 100 = \frac{284.0837}{182.0368 + 120.0575} \times 100 = 94.03\%$$

$$\text{E-factor (g/g)} = \frac{\text{Total mass of wastes}}{\text{Mass of the product}} = \frac{(\text{Mass of raw materials} - \text{mass of product})}{\text{Mass of the the product}} = \frac{(0.302 - 0.270)}{0.302} = 0.11$$

**Table X.** Green Metrics (EMY, AE, CE, RME and E-factor) for 3aa, 3ba , 5aa and 5ba compound :

| Product | Yield (%) | EMY (%) | AE (%) | CE (%) | RME (%) | E-factor (g/g) |
|---------|-----------|---------|--------|--------|---------|----------------|
| 3aa     | 95        | 89.40   | 94.03  | 95.04  | 94.03   | 0.11           |
| 3ba     | 92        | 41.32   | 44.90  | 40.58  | 44.90   | 0.59           |
| 5aa     | 86        | 73.13   | 85.00  | 71.67  | 85.00   | 0.27           |
| 5ba     | 88        | 73.02   | 67.38  | 69.45  | 67.38   | 0.27           |
